# Supplementary material for: MicroRNA Expression and Regulation in Human Ovarian Carcinoma Cells by Luteinizing Hormone
Source: PLoS One. 2011 Jul 12;6(7):e21730. doi: 10.1371/journal.pone.0021730 (PMC3134471; doi:10.1371/journal.pone.0021730)
Supplement: Table S2 — 14 pairs of closest neighbors from the differentially expressed microRNAs identified in our data. (XLSX) [file pone.0021730.s002.xlsx]

## Sheet: Sheet1
# Table S2. 14 pairs of closest neighbors from the differentially expressed microRNAs identified in our data.
Distance	Chr.	miRNA-A		miRNA-B
(kb)		hsa-*	Overlapping region	hsa-*	Overlapping region
151.1	chr12	mir-613	intron (APOLD3)	mir-614	intergenic
205.3	chr17	mir-497	intron (AC027763)	mir-324	intron (ACADVL)
690	chr17	mir-301a	intron (SKA4)	mir-21	intergenic
1023.7	chr7	mir-592	intron (GRM8)	mir-593	intron (SND4)
1153.1	chr3	mir-425	intron (DALRD3)	mir-566	intron (SEMA3F)
1219	chr5	mir-581	intron (ARL15)	mir-449b	intron (DALRD3)
1582.1	chr9	mir-600	intron (STRBP)	mir-181b-2	intron (RP11-348K3)
3102.9	chr17	mir-21	intergenic	mir-633	intergenic
3276.6	chr8	mir-151	intron (PTK2)	mir-661	intron (PLEC1)
3550.9	chr9	mir-181b-2	intron (RP11-348K3)	mir-199b	intron (DNM1)
3797.8	chr1	mir-554	intron (RTCD2)	mir-555	intron (ASH1L)
4053.2	chr22	mir-659	intergenic	mir-33a	intron (SREBF3)
4154.1	chr3	mir-564	intron (KIF15)	mir-425	intron (DALRD3)
4532.9	chr5	mir-449b	intron (CDC20B)	mir-582	intron (PDE4D)
