# Supplementary material for: MicroRNA Expression and Regulation in Human Ovarian Carcinoma Cells by Luteinizing Hormone
Source: PLoS One. 2011 Jul 12;6(7):e21730. doi: 10.1371/journal.pone.0021730 (PMC3134471; doi:10.1371/journal.pone.0021730)
Supplement: Table S3 — Correlated groups of microRNAs and their host genes. (XLSX) [file pone.0021730.s003.xlsx]

## Sheet: Sheet1
# Table S3. Correlated groups of microRNAs and their host genes.
	Group	miRNA/host gene
Positive pairs	highly correlated (cc>0.77, p-value <=0.05)	mir-555/ASH1L, mir-22/C17orf93, mir-198/FSTL1, mir-561/GULP1, mir-564/KIF15, mir-301b/TOP3B, mir-199b/DNM1 (anti-sense)
	Moderately correlated	mir-611/C11orf10, mir-339/C7orf50, mir-582/PDE4D, mir-661/PLEC1, mir-597/TNKS, mir-301b/TOP3B
	(0.6<cc<0.77, p-value <0.1)
	Poorly correlated (0<cc<0.6)	mir-449b/CDC20B, mir-425/DALRD3, mir-625/FUT8, mir-642/GIPR, mir-149/GPC1, mir-592/GRM8, mir-103-2/PANK3, mir-139/PDE2A, mir-301B/PPIL4 (anti-sense), mir-151/PTK2, mir-548C/RASSF7, mir-101-2/RCL1, mir-576/SEC24B, mir-566/SEMA3F, mir-600/STRBP, mir-604/SVIL, mir-569/TNIK
Reverse pairs		mir-581/ARL15, mir-7-1/HNRNPK, mir-93/MCM9, mir-30E/NFYC
