# Supplementary material for: MicroRNA Expression and Regulation in Human Ovarian Carcinoma Cells by Luteinizing Hormone
Source: PLoS One. 2011 Jul 12;6(7):e21730. doi: 10.1371/journal.pone.0021730 (PMC3134471; doi:10.1371/journal.pone.0021730)
Supplement: Table S4 — Predicted gene targets for each microRNA by both MiRanda and TargetScan. (XLSX) [file pone.0021730.s004.xlsx]

## Sheet: Sheet1
# Table S4 Predicted gene targets for each microRNA by both MiRanda and TargetScan
miRNA	Transcript_id	Gene Symble	Name
hsa-miR-199b-5p	NM_000333	ATXN7	ataxin 7
hsa-miR-199b-5p	NM_015904	EIF5B	eukaryotic translation initiation factor 5B
hsa-miR-199b-5p	NM_018287	ARHGAP12	Rho GTPase activating protein 12
hsa-miR-199b-5p	NM_019084	CCNJ	cyclin J
hsa-miR-199b-5p	NM_020307	CCNL1	cyclin L1
hsa-miR-199b-5p	NM_020689	SLC24A3	solute carrier family 24 (sodium/potassium/calcium exchanger), member 3
hsa-miR-199b-5p	NM_020713	ZNF512B	zinc finger protein 512B
hsa-miR-199b-5p	NM_020824	ARHGAP21	Rho GTPase activating protein 21
hsa-miR-199b-5p	NM_020919	ALS2	amyotrophic lateral sclerosis 2 (juvenile)
hsa-miR-199b-5p	NM_022474	MPP5	membrane protein, palmitoylated 5 (MAGUK p55 subfamily member 5)
hsa-miR-199b-5p	NM_022781	RNF38	ring finger protein 38
hsa-miR-199b-5p	NM_024529	CDC73	cell division cycle 73, Paf1/RNA polymerase II complex component, homolog (S. cerevisiae)
hsa-miR-199b-5p	NM_024771	NAT11	N-acetyltransferase 11
hsa-miR-199b-5p	NM_025154	UNC84A	unc-84 homolog A (C. elegans)
hsa-miR-199b-5p	NM_031935	HMCN1	hemicentin 1
hsa-miR-199b-5p	NM_153810	C10orf46	chromosome 10 open reading frame 46
hsa-miR-199b-5p	NM_175854	PAN3	PAN3 polyA specific ribonuclease subunit homolog (S. cerevisiae)
hsa-miR-199b-5p	NM_181054	HIF1A	hypoxia-inducible factor 1, alpha subunit (basic helix-loop-helix transcription factor)
hsa-miR-199b-5p	NM_014363	SACS	spastic ataxia of Charlevoix-Saguenay (sacsin)
hsa-miR-199b-5p	NM_014246	CELSR1	cadherin, EGF LAG seven-pass G-type receptor 1 (flamingo homolog, Drosophila)
hsa-miR-199b-5p	NM_013281	FLRT3	fibronectin leucine rich transmembrane protein 3
hsa-miR-199b-5p	NM_001001549	GRB10	growth factor receptor-bound protein 10
hsa-miR-199b-5p	NM_001002243	AFTPH	aftiphilin
hsa-miR-199b-5p	NM_002355	M6PR	mannose-6-phosphate receptor (cation dependent)
hsa-miR-199b-5p	NM_002419	MAP3K11	mitogen-activated protein kinase kinase kinase 11
hsa-miR-199b-5p	NM_002874	RAD23B	RAD23 homolog B (S. cerevisiae)
hsa-miR-199b-5p	NM_003204	NFE2L1	nuclear factor (erythroid-derived 2)-like 1
hsa-miR-199b-5p	NM_003270	TSPAN6	tetraspanin 6
hsa-miR-199b-5p	NM_003488	AKAP1	A kinase (PRKA) anchor protein 1
hsa-miR-199b-5p	NM_004440	EPHA7	EPH receptor A7
hsa-miR-199b-5p	NM_004795	KL	klotho
hsa-miR-199b-5p	NM_005347	HSPA5	heat shock 70kDa protein 5 (glucose-regulated protein, 78kDa)
hsa-miR-199b-5p	NM_005562	LAMC2	laminin, gamma 2
hsa-miR-199b-5p	NM_005898	CAPRIN1	cell cycle associated protein 1
hsa-miR-199b-5p	NM_006282	STK4	serine/threonine kinase 4
hsa-miR-199b-5p	NM_006352	ZNF238	zinc finger protein 238
hsa-miR-199b-5p	NM_012238	SIRT1	sirtuin (silent mating type information regulation 2 homolog) 1 (S. cerevisiae)
hsa-miR-199b-5p	NM_013279	C11orf9	chromosome 11 open reading frame 9
hsa-miR-199b-5p	NM_181459	PAX3	paired box 3
hsa-miR-101	NM_005378	MYCN	v-myc myelocytomatosis viral related oncogene, neuroblastoma derived (avian)
hsa-miR-101	NM_152998	EZH2	enhancer of zeste homolog 2 (Drosophila)
hsa-miR-101	NM_015460	MYRIP	myosin VIIA and Rab interacting protein
hsa-miR-101	NM_015711	GLTSCR1	glioma tumor suppressor candidate region gene 1
hsa-miR-101	NM_016231	NLK	nemo-like kinase
hsa-miR-101	NM_017582	UBE2Q1	ubiquitin-conjugating enzyme E2Q family member 1
hsa-miR-101	NM_017680	ASPN	asporin
hsa-miR-101	NM_017742	ZCCHC2	zinc finger, CCHC domain containing 2
hsa-miR-101	NM_017944	USP47	ubiquitin specific peptidase 47
hsa-miR-101	NM_018181	ZNF532	zinc finger protein 532
hsa-miR-101	NM_007350	PHLDA1	pleckstrin homology-like domain, family A, member 1
hsa-miR-101	NM_015215	CAMTA1	calmodulin binding transcription activator 1
hsa-miR-101	NM_012193	FZD4	frizzled homolog 4 (Drosophila)
hsa-miR-101	NM_013231	FLRT2	fibronectin leucine rich transmembrane protein 2
hsa-miR-101	NM_013281	FLRT3	fibronectin leucine rich transmembrane protein 3
hsa-miR-101	NM_014011	SOCS5	suppressor of cytokine signaling 5
hsa-miR-101	NM_014016	SACM1L	SAC1 suppressor of actin mutations 1-like (yeast)
hsa-miR-101	NM_014615	KIAA0182	KIAA0182
hsa-miR-101	NM_014962	BTBD3	BTB (POZ) domain containing 3
hsa-miR-101	NM_015032	PDS5B	PDS5, regulator of cohesion maintenance, homolog B (S. cerevisiae)
hsa-miR-101	NM_018970	GPR85	G protein-coupled receptor 85
hsa-miR-101	NM_019084	CCNJ	cyclin J
hsa-miR-101	NM_020856	TSHZ3	teashirt zinc finger homeobox 3
hsa-miR-101	NM_052911	ESCO1	establishment of cohesion 1 homolog 1 (S. cerevisiae)
hsa-miR-101	NM_080927	DCBLD2	discoidin, CUB and LCCL domain containing 2
hsa-miR-101	NM_133496	SLC30A7	solute carrier family 30 (zinc transporter), member 7
hsa-miR-101	NM_152557	ZNF746	zinc finger protein 746
hsa-miR-101	NM_152991	EED	embryonic ectoderm development
hsa-miR-101	NM_153207	AEBP2	AE binding protein 2
hsa-miR-101	NM_173552	C3orf58	chromosome 3 open reading frame 58
hsa-miR-101	NM_199324	OTUD4	OTU domain containing 4
hsa-miR-101	NM_033387	FAM78A	family with sequence similarity 78, member A
hsa-miR-101	NM_033337	CAV3	caveolin 3
hsa-miR-101	NM_021943	ZFAND3	zinc finger, AN1-type domain 3
hsa-miR-101	NM_023075	MPPE1	metallophosphoesterase 1
hsa-miR-101	NM_025191	EDEM3	ER degradation enhancer, mannosidase alpha-like 3
hsa-miR-101	NM_025195	TRIB1	tribbles homolog 1 (Drosophila)
hsa-miR-101	NM_030571	NDFIP1	Nedd4 family interacting protein 1
hsa-miR-101	NM_032217	ANKRD17	ankyrin repeat domain 17
hsa-miR-101	NM_032505	KBTBD8	kelch repeat and BTB (POZ) domain containing 8
hsa-miR-101	NM_033224	PURB	purine-rich element binding protein B
hsa-miR-101	NM_213589	RAPH1	Ras association (RalGDS/AF-6) and pleckstrin homology domains 1
hsa-miR-101	NM_006996	SLC19A2	solute carrier family 19 (thiamine transporter), member 2
hsa-miR-101	NM_000248	MITF	microphthalmia-associated transcription factor
hsa-miR-101	NM_001795	CDH5	cadherin 5, type 2, VE-cadherin (vascular epithelium)
hsa-miR-101	NM_001797	CDH11	cadherin 11, type 2, OB-cadherin (osteoblast)
hsa-miR-101	NM_001829	CLCN3	chloride channel 3
hsa-miR-101	NM_001999	FBN2	fibrillin 2 (congenital contractural arachnodactyly)
hsa-miR-101	NM_002074	GNB1	guanine nucleotide binding protein (G protein), beta polypeptide 1
hsa-miR-101	NM_002265	KPNB1	karyopherin (importin) beta 1
hsa-miR-101	NM_002515	NOVA1	neuro-oncological ventral antigen 1
hsa-miR-101	NM_002912	REV3L	REV3-like, catalytic subunit of DNA polymerase zeta (yeast)
hsa-miR-101	NM_001423	EMP1	epithelial membrane protein 1
hsa-miR-101	NM_001001331	ATP2B2	ATPase, Ca++ transporting, plasma membrane 2
hsa-miR-101	NM_000332	ATXN1	ataxin 1
hsa-miR-101	NM_000346	SOX9	SRY (sex determining region Y)-box 9 (campomelic dysplasia, autosomal sex-reversal)
hsa-miR-101	NM_000430	PAFAH1B1	platelet-activating factor acetylhydrolase, isoform Ib, alpha subunit 45kDa
hsa-miR-101	NM_000493	COL10A1	collagen, type X, alpha 1(Schmid metaphyseal chondrodysplasia)
hsa-miR-101	NM_000503	EYA1	eyes absent homolog 1 (Drosophila)
hsa-miR-101	NM_000508	FGA	fibrinogen alpha chain
hsa-miR-101	NM_000724	CACNB2	calcium channel, voltage-dependent, beta 2 subunit
hsa-miR-101	NM_000963	PTGS2	prostaglandin-endoperoxide synthase 2 (prostaglandin G/H synthase and cyclooxygenase)
hsa-miR-101	NM_003069	SMARCA1	SWI/SNF related, matrix associated, actin dependent regulator of chromatin, subfamily a, member 1
hsa-miR-101	NM_003155	STC1	stanniocalcin 1
hsa-miR-101	NM_003338	UBE2D1	ubiquitin-conjugating enzyme E2D 1 (UBC4/5 homolog, yeast)
hsa-miR-101	NM_005493	RANBP9	RAN binding protein 9
hsa-miR-101	NM_005688	ABCC5	ATP-binding cassette, sub-family C (CFTR/MRP), member 5
hsa-miR-101	NM_006015	ARID1A	AT rich interactive domain 1A (SWI-like)
hsa-miR-101	NM_006022	TSC22D1	TSC22 domain family, member 1
hsa-miR-101	NM_006203	PDE4D	phosphodiesterase 4D, cAMP-specific (phosphodiesterase E3 dunce homolog, Drosophila)
hsa-miR-101	NM_006251	PRKAA1	protein kinase, AMP-activated, alpha 1 catalytic subunit
hsa-miR-101	NM_006544	EXOC5	exocyst complex component 5
hsa-miR-101	NM_006565	CTCF	CCCTC-binding factor (zinc finger protein)
hsa-miR-101	NM_005475	SH2B3	SH2B adaptor protein 3
hsa-miR-101	NM_005252	FOS	v-fos FBJ murine osteosarcoma viral oncogene homolog
hsa-miR-101	NM_003339	UBE2D2	ubiquitin-conjugating enzyme E2D 2 (UBC4/5 homolog, yeast)
hsa-miR-101	NM_003506	FZD6	frizzled homolog 6 (Drosophila)
hsa-miR-101	NM_003885	CDK5R1	cyclin-dependent kinase 5, regulatory subunit 1 (p35)
hsa-miR-101	NM_004161	RAB1A	RAB1A, member RAS oncogene family
hsa-miR-101	NM_004170	SLC1A1	solute carrier family 1 (neuronal/epithelial high affinity glutamate transporter, system Xag), member 1
hsa-miR-101	NM_004393	DAG1	dystroglycan 1 (dystrophin-associated glycoprotein 1)
hsa-miR-101	NM_004417	DUSP1	dual specificity phosphatase 1
hsa-miR-101	NM_004612	TGFBR1	transforming growth factor, beta receptor I (activin A receptor type II-like kinase, 53kDa)
hsa-miR-101	NM_006777	ZBTB33	zinc finger and BTB domain containing 33
hsa-miR-29c	NM_000089	COL1A2	collagen, type I, alpha 2
hsa-miR-29c	NM_000090	COL3A1	collagen, type III, alpha 1 (Ehlers-Danlos syndrome type IV, autosomal dominant)
hsa-miR-29c	NM_000088	COL1A1	collagen, type I, alpha 1
hsa-miR-29c	NM_001846	COL4A2	collagen, type IV, alpha 2
hsa-miR-29c	NM_003211	TDG	thymine-DNA glycosylase
hsa-miR-29c	NM_015457	ZDHHC5	zinc finger, DHHC-type containing 5
hsa-miR-29c	NM_018910	PCDHA7	protocadherin alpha 7
hsa-miR-29c	NM_014918	CHSY1	chondroitin sulfate synthase 1
hsa-miR-29c	NM_018911	PCDHA8	protocadherin alpha 8
hsa-miR-29c	NM_020133	AGPAT4	1-acylglycerol-3-phosphate O-acyltransferase 4 (lysophosphatidic acid acyltransferase, delta)
hsa-miR-29c	NM_020443	NAV1	neuron navigator 1
hsa-miR-29c	NM_020801	ARRDC3	arrestin domain containing 3
hsa-miR-29c	NM_021101	CLDN1	claudin 1
hsa-miR-29c	NM_021159	RAP1GDS1	RAP1, GTP-GDP dissociation stimulator 1
hsa-miR-29c	NM_021643	TRIB2	tribbles homolog 2 (Drosophila)
hsa-miR-29c	NM_022443	MLF1	myeloid leukemia factor 1
hsa-miR-29c	NM_022462	HIF3A	hypoxia inducible factor 3, alpha subunit
hsa-miR-29c	NM_018909	PCDHA6	protocadherin alpha 6
hsa-miR-29c	NM_018906	PCDHA3	protocadherin alpha 3
hsa-miR-29c	NM_015719	COL5A3	collagen, type V, alpha 3
hsa-miR-29c	NM_017544	NKRF	NFKB repressing factor
hsa-miR-29c	NM_017635	SUV420H1	suppressor of variegation 4-20 homolog 1 (Drosophila)
hsa-miR-29c	NM_018416	FOXJ2	forkhead box J2
hsa-miR-29c	NM_018667	SMPD3	sphingomyelin phosphodiesterase 3, neutral membrane (neutral sphingomyelinase II)
hsa-miR-29c	NM_018898	PCDHAC1	protocadherin alpha subfamily C, 1
hsa-miR-29c	NM_018899	PCDHAC2	protocadherin alpha subfamily C, 2
hsa-miR-29c	NM_018900	PCDHA1	protocadherin alpha 1
hsa-miR-29c	NM_018901	PCDHA10	protocadherin alpha 10
hsa-miR-29c	NM_015435	RNF19A	ring finger protein 19A
hsa-miR-29c	NM_018905	PCDHA2	protocadherin alpha 2
hsa-miR-29c	NM_018903	PCDHA12	protocadherin alpha 12
hsa-miR-29c	NM_022552	DNMT3A	DNA (cytosine-5-)-methyltransferase 3 alpha
hsa-miR-29c	NM_022780	RMND5A	required for meiotic nuclear division 5 homolog A (S. cerevisiae)
hsa-miR-29c	NM_152527	SLC16A14	solute carrier family 16, member 14 (monocarboxylic acid transporter 14)
hsa-miR-29c	NM_152624	DCP2	DCP2 decapping enzyme homolog (S. cerevisiae)
hsa-miR-29c	NM_152678	FAM116A	family with sequence similarity 116, member A
hsa-miR-29c	NM_152835	PDIK1L	PDLIM1 interacting kinase 1 like
hsa-miR-29c	NM_152910	DGKH	diacylglycerol kinase, eta
hsa-miR-29c	NM_153252	BRWD3	bromodomain and WD repeat domain containing 3
hsa-miR-29c	NM_173683	XKR6	XK, Kell blood group complex subunit-related family, member 6
hsa-miR-29c	NM_178123	SESTD1	SEC14 and spectrin domains 1
hsa-miR-29c	NM_181354	OXR1	oxidation resistance 1
hsa-miR-29c	NM_182920	ADAMTS9	ADAM metallopeptidase with thrombospondin type 1 motif, 9
hsa-miR-29c	NM_198337	INSIG1	insulin induced gene 1
hsa-miR-29c	NM_152523	CCNYL1	cyclin Y-like 1
hsa-miR-29c	NM_152493	ZNF362	zinc finger protein 362
hsa-miR-29c	NM_152424	FAM123B	family with sequence similarity 123B
hsa-miR-29c	NM_022893	BCL11A	B-cell CLL/lymphoma 11A (zinc finger protein)
hsa-miR-29c	NM_024771	NAT11	N-acetyltransferase 11
hsa-miR-29c	NM_030625	TET1	tet oncogene 1
hsa-miR-29c	NM_030816	ANKRD13C	ankyrin repeat domain 13C
hsa-miR-29c	NM_032701	SUV420H2	suppressor of variegation 4-20 homolog 2 (Drosophila)
hsa-miR-29c	NM_032822	FAM136A	family with sequence similarity 136, member A
hsa-miR-29c	NM_052818	N4BP2L1	NEDD4 binding protein 2-like 1
hsa-miR-29c	NM_053002	MED12L	mediator complex subunit 12-like
hsa-miR-29c	NM_138390	TMEM169	transmembrane protein 169
hsa-miR-29c	NM_138391	TMEM183A	transmembrane protein 183A
hsa-miR-29c	NM_152400	C4orf32	chromosome 4 open reading frame 32
hsa-miR-29c	NM_198935	SS18L1	synovial sarcoma translocation gene on chromosome 18-like 1
hsa-miR-29c	NM_000092	COL4A4	collagen, type IV, alpha 4
hsa-miR-29c	NM_001844	COL2A1	collagen, type II, alpha 1
hsa-miR-29c	NM_001845	COL4A1	collagen, type IV, alpha 1
hsa-miR-29c	NM_001854	COL11A1	collagen, type XI, alpha 1
hsa-miR-29c	NM_001855	COL15A1	collagen, type XV, alpha 1
hsa-miR-29c	NM_001858	COL19A1	collagen, type XIX, alpha 1
hsa-miR-29c	NM_001918	DBT	dihydrolipoamide branched chain transacylase E2
hsa-miR-29c	NM_002039	GAB1	GRB2-associated binding protein 1
hsa-miR-29c	NM_002130	HMGCS1	3-hydroxy-3-methylglutaryl-Coenzyme A synthase 1 (soluble)
hsa-miR-29c	NM_002202	ISL1	ISL LIM homeobox 1
hsa-miR-29c	NM_002293	LAMC1	laminin, gamma 1 (formerly LAMB2)
hsa-miR-29c	NM_002482	NASP	nuclear autoantigenic sperm protein (histone-binding)
hsa-miR-29c	NM_001621	AHR	aryl hydrocarbon receptor
hsa-miR-29c	NM_001241	CCNT2	cyclin T2
hsa-miR-29c	NM_001233	CAV2	caveolin 2
hsa-miR-29c	NM_000138	FBN1	fibrillin 1
hsa-miR-29c	NM_000237	LPL	lipoprotein lipase
hsa-miR-29c	NM_000304	PMP22	peripheral myelin protein 22
hsa-miR-29c	NM_000314	PTEN	phosphatase and tensin homolog (mutated in multiple advanced cancers 1)
hsa-miR-29c	NM_000386	BLMH	bleomycin hydrolase
hsa-miR-29c	NM_000393	COL5A2	collagen, type V, alpha 2
hsa-miR-29c	NM_000555	DCX	doublecortex; lissencephaly, X-linked (doublecortin)
hsa-miR-29c	NM_000793	DIO2	deiodinase, iodothyronine, type II
hsa-miR-29c	NM_000859	HMGCR	3-hydroxy-3-methylglutaryl-Coenzyme A reductase
hsa-miR-29c	NM_000943	PPIC	peptidylprolyl isomerase C (cyclophilin C)
hsa-miR-29c	NM_001222	CAMK2G	calcium/calmodulin-dependent protein kinase (CaM kinase) II gamma
hsa-miR-29c	NM_002556	OSBP	oxysterol binding protein
hsa-miR-29c	NM_003074	SMARCC1	SWI/SNF related, matrix associated, actin dependent regulator of chromatin, subfamily c, member 1
hsa-miR-29c	NM_005627	SGK1	serum/glucocorticoid regulated kinase 1
hsa-miR-29c	NM_005841	SPRY1	sprouty homolog 1, antagonist of FGF signaling (Drosophila)
hsa-miR-29c	NM_005927	MFAP3	microfibrillar-associated protein 3
hsa-miR-29c	NM_006037	HDAC4	histone deacetylase 4
hsa-miR-29c	NM_006332	IFI30	interferon, gamma-inducible protein 30
hsa-miR-29c	NM_006738	AKAP13	A kinase (PRKA) anchor protein 13
hsa-miR-29c	NM_006791	MORF4L1	mortality factor 4 like 1
hsa-miR-29c	NM_006874	ELF2	E74-like factor 2 (ets domain transcription factor)
hsa-miR-29c	NM_006892	DNMT3B	DNA (cytosine-5-)-methyltransferase 3 beta
hsa-miR-29c	NM_007162	TFEB	transcription factor EB
hsa-miR-29c	NM_014035	SNX24	sorting nexin 24
hsa-miR-29c	NM_005595	NFIA	nuclear factor I/A
hsa-miR-29c	NM_005399	PRKAB2	protein kinase, AMP-activated, beta 2 non-catalytic subunit
hsa-miR-29c	NM_005378	MYCN	v-myc myelocytomatosis viral related oncogene, neuroblastoma derived (avian)
hsa-miR-29c	NM_003222	TFAP2C	transcription factor AP-2 gamma (activating enhancer binding protein 2 gamma)
hsa-miR-29c	NM_003463	PTP4A1	protein tyrosine phosphatase type IVA, member 1
hsa-miR-29c	NM_003575	ZNF282	zinc finger protein 282
hsa-miR-29c	NM_003620	PPM1D	protein phosphatase 1D magnesium-dependent, delta isoform
hsa-miR-29c	NM_003794	SNX4	sorting nexin 4
hsa-miR-29c	NM_004136	IREB2	iron-responsive element binding protein 2
hsa-miR-29c	NM_004369	COL6A3	collagen, type VI, alpha 3
hsa-miR-29c	NM_004772	C5orf13	chromosome 5 open reading frame 13
hsa-miR-29c	NM_004926	ZFP36L1	zinc finger protein 36, C3H type-like 1
hsa-miR-29c	NM_005302	GPR37	G protein-coupled receptor 37 (endothelin receptor type B-like)
hsa-miR-29c	NM_005329	HAS3	hyaluronan synthase 3
hsa-miR-29c	NM_014903	NAV3	neuron navigator 3
hsa-miR-103	NM_199324	OTUD4	OTU domain containing 4
hsa-miR-103	NM_018120	ARMC1	armadillo repeat containing 1
hsa-miR-103	NM_017719	SNRK	SNF related kinase
hsa-miR-103	NM_017629	EIF2C4	eukaryotic translation initiation factor 2C, 4
hsa-miR-103	NM_016436	PHF20	PHD finger protein 20
hsa-miR-103	NM_016289	CAB39	calcium binding protein 39
hsa-miR-103	NM_016169	SUFU	suppressor of fused homolog (Drosophila)
hsa-miR-103	NM_015879	ST8SIA3	ST8 alpha-N-acetyl-neuraminide alpha-2,8-sialyltransferase 3
hsa-miR-103	NM_015640	SERBP1	SERPINE1 mRNA binding protein 1
hsa-miR-103	NM_015374	UNC84B	unc-84 homolog B (C. elegans)
hsa-miR-103	NM_015236	LPHN3	latrophilin 3
hsa-miR-103	NM_015216	HISPPD1	histidine acid phosphatase domain containing 1
hsa-miR-103	NM_015094	HIC2	hypermethylated in cancer 2
hsa-miR-103	NM_014912	CPEB3	cytoplasmic polyadenylation element binding protein 3
hsa-miR-103	NM_018413	CHST11	carbohydrate (chondroitin 4) sulfotransferase 11
hsa-miR-103	NM_020475	ANK1	ankyrin 1, erythrocytic
hsa-miR-103	NM_178450	2011-03-03	membrane-associated ring finger (C3HC4) 3
hsa-miR-103	NM_153226	TMEM20	transmembrane protein 20
hsa-miR-103	NM_153029	N4BP1	NEDD4 binding protein 1
hsa-miR-103	NM_152450	FAM81A	family with sequence similarity 81, member A
hsa-miR-103	NM_147128	ZNRF2	zinc and ring finger 2
hsa-miR-103	NM_033645	FBXW11	F-box and WD repeat domain containing 11
hsa-miR-103	NM_033224	PURB	purine-rich element binding protein B
hsa-miR-103	NM_032784	RSPO3	R-spondin 3 homolog (Xenopus laevis)
hsa-miR-103	NM_032440	LCOR	ligand dependent nuclear receptor corepressor
hsa-miR-103	NM_032439	PHYHIPL	phytanoyl-CoA 2-hydroxylase interacting protein-like
hsa-miR-103	NM_032181	TMEM166	transmembrane protein 166
hsa-miR-103	NM_022893	BCL11A	B-cell CLL/lymphoma 11A (zinc finger protein)
hsa-miR-103	NM_022781	RNF38	ring finger protein 38
hsa-miR-103	NM_014904	RAB11FIP2	RAB11 family interacting protein 2 (class I)
hsa-miR-103	NM_014790	JAKMIP2	janus kinase and microtubule interacting protein 2
hsa-miR-103	NM_014678	SAPS2	SAPS domain family, member 2
hsa-miR-103	NM_004440	EPHA7	EPH receptor A7
hsa-miR-103	NM_004349	RUNX1T1	runt-related transcription factor 1; translocated to, 1 (cyclin D-related)
hsa-miR-103	NM_003453	ZMYM2	zinc finger, MYM-type 2
hsa-miR-103	NM_003405	YWHAH	tyrosine 3-monooxygenase/tryptophan 5-monooxygenase activation protein, eta polypeptide
hsa-miR-103	NM_002687	PNN	pinin, desmosome associated protein
hsa-miR-103	NM_002515	NOVA1	neuro-oncological ventral antigen 1
hsa-miR-103	NM_002006	FGF2	fibroblast growth factor 2 (basic)
hsa-miR-103	NM_001969	EIF5	eukaryotic translation initiation factor 5
hsa-miR-103	NM_001709	BDNF	brain-derived neurotrophic factor
hsa-miR-103	NM_001408	CELSR2	cadherin, EGF LAG seven-pass G-type receptor 2 (flamingo homolog, Drosophila)
hsa-miR-103	NM_001259	CDK6	cyclin-dependent kinase 6
hsa-miR-103	NM_001002909	GPATCH8	G patch domain containing 8
hsa-miR-103	NM_000722	CACNA2D1	calcium channel, voltage-dependent, alpha 2/delta subunit 1
hsa-miR-103	NM_004475	FLOT2	flotillin 2
hsa-miR-103	NM_004504	HRB	HIV-1 Rev binding protein
hsa-miR-103	NM_014572	LATS2	LATS, large tumor suppressor, homolog 2 (Drosophila)
hsa-miR-103	NM_013449	BAZ2A	bromodomain adjacent to zinc finger domain, 2A
hsa-miR-103	NM_012395	PFTK1	PFTAIRE protein kinase 1
hsa-miR-103	NM_012199	EIF2C1	eukaryotic translation initiation factor 2C, 1
hsa-miR-103	NM_012082	ZFPM2	zinc finger protein, multitype 2
hsa-miR-103	NM_006763	BTG2	BTG family, member 2
hsa-miR-103	NM_006141	DYNC1LI2	dynein, cytoplasmic 1, light intermediate chain 2
hsa-miR-103	NM_006136	CAPZA2	capping protein (actin filament) muscle Z-line, alpha 2
hsa-miR-103	NM_005708	GPC6	glypican 6
hsa-miR-103	NM_005271	GLUD1	glutamate dehydrogenase 1
hsa-miR-103	NM_004984	KIF5A	kinesin family member 5A
hsa-miR-103	NM_004856	KIF23	kinesin family member 23
hsa-miR-103	NM_004667	HERC2	hect domain and RLD 2
hsa-miR-103	NM_000267	NF1	neurofibromin 1 (neurofibromatosis, von Recklinghausen disease, Watson disease)
hsa-miR-129-5p	NM_177422	EIF2C3	eukaryotic translation initiation factor 2C, 3
hsa-miR-129-5p	NM_015215	CAMTA1	calmodulin binding transcription activator 1
hsa-miR-129-5p	NM_020182	PMEPA1	prostate transmembrane protein, androgen induced 1
hsa-miR-129-5p	NM_018834	MATR3	matrin 3
hsa-miR-129-5p	NM_018584	CAMK2N1	calcium/calmodulin-dependent protein kinase II inhibitor 1
hsa-miR-129-5p	NM_016281	TAOK3	TAO kinase 3
hsa-miR-129-5p	NM_015508	TIPARP	TCDD-inducible poly(ADP-ribose) polymerase
hsa-miR-129-5p	NM_015481	ZNF385A	zinc finger protein 385A
hsa-miR-129-5p	NM_015200	PDS5A	PDS5, regulator of cohesion maintenance, homolog A (S. cerevisiae)
hsa-miR-129-5p	NM_015094	HIC2	hypermethylated in cancer 2
hsa-miR-129-5p	NM_015080	NRXN2	neurexin 2
hsa-miR-129-5p	NM_014729	TOX	thymocyte selection-associated high mobility group box
hsa-miR-129-5p	NM_020772	NUFIP2	nuclear fragile X mental retardation protein interacting protein 2
hsa-miR-129-5p	NM_020346	SLC17A6	solute carrier family 17 (sodium-dependent inorganic phosphate cotransporter), member 6
hsa-miR-129-5p	NM_021809	TGIF2	TGFB-induced factor homeobox 2
hsa-miR-129-5p	NM_175709	CBX7	chromobox homolog 7
hsa-miR-129-5p	NM_170675	MEIS2	Meis homeobox 2
hsa-miR-129-5p	NM_144723	ZMAT2	zinc finger, matrin type 2
hsa-miR-129-5p	NM_133433	NIPBL	Nipped-B homolog (Drosophila)
hsa-miR-129-5p	NM_033285	TP53INP1	tumor protein p53 inducible nuclear protein 1
hsa-miR-129-5p	NM_032320	BTBD10	BTB (POZ) domain containing 10
hsa-miR-129-5p	NM_024496	C14orf4	chromosome 14 open reading frame 4
hsa-miR-129-5p	NM_023929	ZBTB10	zinc finger and BTB domain containing 10
hsa-miR-129-5p	NM_022771	TBC1D15	TBC1 domain family, member 15
hsa-miR-129-5p	NM_021813	BACH2	BTB and CNC homology 1, basic leucine zipper transcription factor 2
hsa-miR-129-5p	NM_014620	HOXC4	homeobox C4
hsa-miR-129-5p	NM_012448	STAT5B	signal transducer and activator of transcription 5B
hsa-miR-129-5p	NM_003107	SOX4	SRY (sex determining region Y)-box 4
hsa-miR-129-5p	NM_002897	RBMS1	RNA binding motif, single stranded interacting protein 1
hsa-miR-129-5p	NM_002851	PTPRZ1	protein tyrosine phosphatase, receptor-type, Z polypeptide 1
hsa-miR-129-5p	NM_002480	PPP1R12A	protein phosphatase 1, regulatory (inhibitor) subunit 12A
hsa-miR-129-5p	NM_002024	FMR1	fragile X mental retardation 1
hsa-miR-129-5p	NM_001429	EP300	E1A binding protein p300
hsa-miR-129-5p	NM_001204	BMPR2	bone morphogenetic protein receptor, type II (serine/threonine kinase)
hsa-miR-129-5p	NM_001003792	RBMS3	RNA binding motif, single stranded interacting protein
hsa-miR-129-5p	NM_001001890	RUNX1	runt-related transcription factor 1 (acute myeloid leukemia 1; aml1 oncogene)
hsa-miR-129-5p	NM_000901	NR3C2	nuclear receptor subfamily 3, group C, member 2
hsa-miR-129-5p	NM_000214	JAG1	jagged 1 (Alagille syndrome)
hsa-miR-129-5p	NM_003760	EIF4G3	eukaryotic translation initiation factor 4 gamma, 3
hsa-miR-129-5p	NM_004458	ACSL4	acyl-CoA synthetase long-chain family member 4
hsa-miR-129-5p	NM_006527	SLBP	stem-loop binding protein
hsa-miR-129-5p	NM_006449	CDC42EP3	CDC42 effector protein (Rho GTPase binding) 3
hsa-miR-129-5p	NM_006383	CIB2	calcium and integrin binding family member 2
hsa-miR-129-5p	NM_006310	NPEPPS	aminopeptidase puromycin sensitive
hsa-miR-129-5p	NM_006186	NR4A2	nuclear receptor subfamily 4, group A, member 2
hsa-miR-129-5p	NM_006078	CACNG2	calcium channel, voltage-dependent, gamma subunit 2
hsa-miR-129-5p	NM_005786	TSHZ1	teashirt zinc finger homeobox 1
hsa-miR-129-5p	NM_005458	GABBR2	gamma-aminobutyric acid (GABA) B receptor, 2
hsa-miR-129-5p	NM_005238	ETS1	v-ets erythroblastosis virus E26 oncogene homolog 1 (avian)
hsa-miR-129-5p	NM_004926	ZFP36L1	zinc finger protein 36, C3H type-like 1
hsa-miR-129-5p	NM_004745	DLGAP2	discs, large (Drosophila) homolog-associated protein 2
hsa-miR-129-5p	NM_000038	APC	adenomatous polyposis coli
hsa-miR-146b-5p	NM_001005366	FBXL10	F-box and leucine-rich repeat protein 10
hsa-miR-146b-5p	NM_024567	HMBOX1	homeobox containing 1
hsa-miR-146b-5p	NM_021946	BCORL1	BCL6 co-repressor-like 1
hsa-miR-146b-5p	NM_018387	STRBP	spermatid perinuclear RNA binding protein
hsa-miR-146b-5p	NM_006537	USP3	ubiquitin specific peptidase 3
hsa-miR-146b-5p	NM_006275	SFRS6	splicing factor, arginine/serine-rich 6
hsa-miR-146b-5p	NM_005639	SYT1	synaptotagmin I
hsa-miR-146b-5p	NM_005359	SMAD4	SMAD family member 4
hsa-miR-146b-5p	NM_004620	TRAF6	TNF receptor-associated factor 6
hsa-miR-146b-5p	NM_004349	RUNX1T1	runt-related transcription factor 1; translocated to, 1 (cyclin D-related)
hsa-miR-146b-5p	NM_002515	NOVA1	neuro-oncological ventral antigen 1
hsa-miR-146b-5p	NM_001390	DTNA	dystrobrevin, alpha
hsa-miR-146b-5p	NM_173510	CCDC117	coiled-coil domain containing 117
hsa-miR-21	NM_006915	RP2	retinitis pigmentosa 2 (X-linked recessive)
hsa-miR-21	NM_000214	JAG1	jagged 1 (Alagille syndrome)
hsa-miR-21	NM_006940	SOX5	SRY (sex determining region Y)-box 5
hsa-miR-21	NM_014319	LEMD3	LEM domain containing 3
hsa-miR-21	NM_014939	KIAA1012	KIAA1012
hsa-miR-21	NM_014952	BAHD1	bromo adjacent homology domain containing 1
hsa-miR-21	NM_015339	ADNP	activity-dependent neuroprotector homeobox
hsa-miR-21	NM_017680	ASPN	asporin
hsa-miR-21	NM_017780	CHD7	chromodomain helicase DNA binding protein 7
hsa-miR-21	NM_020651	PELI1	pellino homolog 1 (Drosophila)
hsa-miR-21	NM_024052	C17orf39	chromosome 17 open reading frame 39
hsa-miR-21	NM_031420	MRPL9	mitochondrial ribosomal protein L9
hsa-miR-21	NM_138426	GLCCI1	glucocorticoid induced transcript 1
hsa-miR-21	NM_145735	ARHGEF7	Rho guanine nucleotide exchange factor (GEF) 7
hsa-miR-21	NM_152903	KBTBD6	kelch repeat and BTB (POZ) domain containing 6
hsa-miR-21	NM_175854	PAN3	PAN3 polyA specific ribonuclease subunit homolog (S. cerevisiae)
hsa-miR-21	NM_006751	SSFA2	sperm specific antigen 2
hsa-miR-21	NM_006106	YAP1	Yes-associated protein 1, 65kDa
hsa-miR-21	NM_000358	TGFBI	transforming growth factor, beta-induced, 68kDa
hsa-miR-21	NM_000362	TIMP3	TIMP metallopeptidase inhibitor 3 (Sorsby fundus dystrophy, pseudoinflammatory)
hsa-miR-21	NM_001001974	PLEKHA1	pleckstrin homology domain containing, family A (phosphoinositide binding specific) member 1
hsa-miR-21	NM_002380	MATN2	matrilin 2
hsa-miR-21	NM_002527	NTF3	neurotrophin 3
hsa-miR-21	NM_002570	PCSK6	proprotein convertase subtilisin/kexin type 6
hsa-miR-21	NM_002655	PLAG1	pleiomorphic adenoma gene 1
hsa-miR-21	NM_002711	PPP1R3A	protein phosphatase 1, regulatory (inhibitor) subunit 3A
hsa-miR-21	NM_002971	SATB1	SATB homeobox 1
hsa-miR-21	NM_003036	SKI	v-ski sarcoma viral oncogene homolog (avian)
hsa-miR-21	NM_003150	STAT3	signal transducer and activator of transcription 3 (acute-phase response factor)
hsa-miR-21	NM_005596	NFIB	nuclear factor I/B
hsa-miR-21	NM_005739	RASGRP1	RAS guanyl releasing protein 1 (calcium and DAG-regulated)
hsa-miR-21	NM_005841	SPRY1	sprouty homolog 1, antagonist of FGF signaling (Drosophila)
hsa-miR-21	NM_005904	SMAD7	SMAD family member 7
hsa-miR-21	NM_178140	PDZD2	PDZ domain containing 2
hsa-miR-210	NM_004952	EFNA3	ephrin-A3
hsa-miR-210	NM_152678	FAM116A	family with sequence similarity 116, member A
hsa-miR-30e	NM_022552	DNMT3A	DNA (cytosine-5-)-methyltransferase 3 alpha
hsa-miR-30e	NM_020474	GALNT1	UDP-N-acetyl-alpha-D-galactosamine:polypeptide N-acetylgalactosaminyltransferase 1 (GalNAc-T1)
hsa-miR-30e	NM_020440	PTGFRN	prostaglandin F2 receptor negative regulator
hsa-miR-30e	NM_020438	DOLPP1	dolichyl pyrophosphate phosphatase 1
hsa-miR-30e	NM_020432	PHTF2	putative homeodomain transcription factor 2
hsa-miR-30e	NM_020423	SCYL3	SCY1-like 3 (S. cerevisiae)
hsa-miR-30e	NM_020390	EIF5A2	eukaryotic translation initiation factor 5A2
hsa-miR-30e	NM_019074	DLL4	delta-like 4 (Drosophila)
hsa-miR-30e	NM_019058	DDIT4	DNA-damage-inducible transcript 4
hsa-miR-30e	NM_019045	WDR44	WD repeat domain 44
hsa-miR-30e	NM_020673	RAB22A	RAB22A, member RAS oncogene family
hsa-miR-30e	NM_020791	TAOK1	TAO kinase 1
hsa-miR-30e	NM_020870	SH3RF1	SH3 domain containing ring finger 1
hsa-miR-30e	NM_022337	RAB38	RAB38, member RAS oncogene family
hsa-miR-30e	NM_022133	SNX16	sorting nexin 16
hsa-miR-30e	NM_022037	TIA1	TIA1 cytotoxic granule-associated RNA binding protein
hsa-miR-30e	NM_021958	HLX	H2.0-like homeobox
hsa-miR-30e	NM_021914	CFL2	cofilin 2 (muscle)
hsa-miR-30e	NM_021183	RAP2C	RAP2C, member of RAS oncogene family
hsa-miR-30e	NM_021012	KCNJ12	potassium inwardly-rectifying channel, subfamily J, member 12
hsa-miR-30e	NM_020935	USP37	ubiquitin specific peptidase 37
hsa-miR-30e	NM_020927	KIAA1576	KIAA1576 protein
hsa-miR-30e	NM_018976	SLC38A2	solute carrier family 38, member 2
hsa-miR-30e	NM_018388	MBNL3	muscleblind-like 3 (Drosophila)
hsa-miR-30e	NM_018325	C9orf72	chromosome 9 open reading frame 72
hsa-miR-30e	NM_016084	RASD1	RAS, dexamethasone-induced 1
hsa-miR-30e	NM_016021	UBE2J1	ubiquitin-conjugating enzyme E2, J1 (UBC6 homolog, yeast)
hsa-miR-30e	NM_015630	EPC2	enhancer of polycomb homolog 2 (Drosophila)
hsa-miR-30e	NM_015575	GIGYF2	GRB10 interacting GYF protein 2
hsa-miR-30e	NM_015554	GLCE	glucuronic acid epimerase
hsa-miR-30e	NM_015527	TBC1D10B	TBC1 domain family, member 10B
hsa-miR-30e	NM_015509	NECAP1	NECAP endocytosis associated 1
hsa-miR-30e	NM_015375	RIPK5	receptor interacting protein kinase 5
hsa-miR-30e	NM_015361	R3HDM1	R3H domain containing 1
hsa-miR-30e	NM_016131	RAB10	RAB10, member RAS oncogene family
hsa-miR-30e	NM_016133	INSIG2	insulin induced gene 2
hsa-miR-30e	NM_016374	ARID4B	AT rich interactive domain 4B (RBP1-like)
hsa-miR-30e	NM_018231	SLC38A7	solute carrier family 38, member 7
hsa-miR-30e	NM_018113	LMBR1L	limb region 1 homolog (mouse)-like
hsa-miR-30e	NM_018103	LRRC8D	leucine rich repeat containing 8 family, member D
hsa-miR-30e	NM_017913	CDC37L1	cell division cycle 37 homolog (S. cerevisiae)-like 1
hsa-miR-30e	NM_017780	CHD7	chromodomain helicase DNA binding protein 7
hsa-miR-30e	NM_017747	ANKHD1	ankyrin repeat and KH domain containing 1
hsa-miR-30e	NM_017742	ZCCHC2	zinc finger, CCHC domain containing 2
hsa-miR-30e	NM_017714	TASP1	taspase, threonine aspartase, 1
hsa-miR-30e	NM_017423	GALNT7	UDP-N-acetyl-alpha-D-galactosamine:polypeptide N-acetylgalactosaminyltransferase 7 (GalNAc-T7)
hsa-miR-30e	NM_015285	WDR7	WD repeat domain 7
hsa-miR-30e	NM_207015	NAALADL2	N-acetylated alpha-linked acidic dipeptidase-like 2
hsa-miR-30e	NM_152991	EED	embryonic ectoderm development
hsa-miR-30e	NM_152758	YTHDF3	YTH domain family, member 3
hsa-miR-30e	NM_152622	MIER3	mesoderm induction early response 1, family member 3
hsa-miR-30e	NM_152522	ARL6IP6	ADP-ribosylation-like factor 6 interacting protein 6
hsa-miR-30e	NM_147189	FAM110B	family with sequence similarity 110, member B
hsa-miR-30e	NM_145893	A2BP1	ataxin 2-binding protein 1
hsa-miR-30e	NM_133263	PPARGC1B	peroxisome proliferator-activated receptor gamma, coactivator 1 beta
hsa-miR-30e	NM_080836	STK35	serine/threonine kinase 35
hsa-miR-30e	NM_080821	C20orf108	chromosome 20 open reading frame 108
hsa-miR-30e	NM_153634	CPNE8	copine VIII
hsa-miR-30e	NM_153690	FAM43A	family with sequence similarity 43, member A
hsa-miR-30e	NM_153702	ELMOD2	ELMO/CED-12 domain containing 2
hsa-miR-30e	NM_199324	OTUD4	OTU domain containing 4
hsa-miR-30e	NM_198686	RAB15	RAB15, member RAS onocogene family
hsa-miR-30e	NM_198353	KCTD8	potassium channel tetramerisation domain containing 8
hsa-miR-30e	NM_178826	TMEM16D	transmembrane protein 16D
hsa-miR-30e	NM_178812	MTDH	metadherin
hsa-miR-30e	NM_173517	VKORC1L1	vitamin K epoxide reductase complex, subunit 1-like 1
hsa-miR-30e	NM_173510	CCDC117	coiled-coil domain containing 117
hsa-miR-30e	NM_173475	DCUN1D3	DCN1, defective in cullin neddylation 1, domain containing 3 (S. cerevisiae)
hsa-miR-30e	NM_172128	CAMK2D	calcium/calmodulin-dependent protein kinase (CaM kinase) II delta
hsa-miR-30e	NM_080678	UBE2F	ubiquitin-conjugating enzyme E2F (putative)
hsa-miR-30e	NM_054111	IHPK3	inositol hexaphosphate kinase 3
hsa-miR-30e	NM_052911	ESCO1	establishment of cohesion 1 homolog 1 (S. cerevisiae)
hsa-miR-30e	NM_030797	FAM49A	family with sequence similarity 49, member A
hsa-miR-30e	NM_024953	C12orf30	chromosome 12 open reading frame 30
hsa-miR-30e	NM_024704	KIF16B	kinesin family member 16B
hsa-miR-30e	NM_024674	LIN28	lin-28 homolog (C. elegans)
hsa-miR-30e	NM_024513	FYCO1	FYVE and coiled-coil domain containing 1
hsa-miR-30e	NM_023039	ANKRA2	ankyrin repeat, family A (RFXANK-like), 2
hsa-miR-30e	NM_023018	NADK	NAD kinase
hsa-miR-30e	NM_022898	BCL11B	B-cell CLL/lymphoma 11B (zinc finger protein)
hsa-miR-30e	NM_022765	MICAL1	microtubule associated monoxygenase, calponin and LIM domain containing 1
hsa-miR-30e	NM_031442	TMEM47	transmembrane protein 47
hsa-miR-30e	NM_032047	B3GNT5	UDP-GlcNAc:betaGal beta-1,3-N-acetylglucosaminyltransferase 5
hsa-miR-30e	NM_032217	ANKRD17	ankyrin repeat domain 17
hsa-miR-30e	NM_052848	CCDC97	coiled-coil domain containing 97
hsa-miR-30e	NM_033626	CCDC120	coiled-coil domain containing 120
hsa-miR-30e	NM_033389	SSH2	slingshot homolog 2 (Drosophila)
hsa-miR-30e	NM_033274	ADAM19	ADAM metallopeptidase domain 19 (meltrin beta)
hsa-miR-30e	NM_032961	PCDH10	protocadherin 10
hsa-miR-30e	NM_032632	PAPOLA	poly(A) polymerase alpha
hsa-miR-30e	NM_032373	PCGF5	polycomb group ring finger 5
hsa-miR-30e	NM_032246	MEX3B	mex-3 homolog B (C. elegans)
hsa-miR-30e	NM_032233	SETD3	SET domain containing 3
hsa-miR-30e	NM_022728	NEUROD6	neurogenic differentiation 6
hsa-miR-30e	NM_004663	RAB11A	RAB11A, member RAS oncogene family
hsa-miR-30e	NM_003615	SLC4A7	solute carrier family 4, sodium bicarbonate cotransporter, member 7
hsa-miR-30e	NM_003591	CUL2	cullin 2
hsa-miR-30e	NM_003489	NRIP1	nuclear receptor interacting protein 1
hsa-miR-30e	NM_003463	PTP4A1	protein tyrosine phosphatase type IVA, member 1
hsa-miR-30e	NM_003406	YWHAZ	tyrosine 3-monooxygenase/tryptophan 5-monooxygenase activation protein, zeta polypeptide
hsa-miR-30e	NM_003112	SP4	Sp4 transcription factor
hsa-miR-30e	NM_002892	ARID4A	AT rich interactive domain 4A (RBP1-like)
hsa-miR-30e	NM_002874	RAD23B	RAD23 homolog B (S. cerevisiae)
hsa-miR-30e	NM_002811	PSMD7	proteasome (prosome, macropain) 26S subunit, non-ATPase, 7
hsa-miR-30e	NM_003654	CHST1	carbohydrate (keratan sulfate Gal-6) sulfotransferase 1
hsa-miR-30e	NM_003728	UNC5C	unc-5 homolog C (C. elegans)
hsa-miR-30e	NM_003766	BECN1	beclin 1, autophagy related
hsa-miR-30e	NM_004481	GALNT2	UDP-N-acetyl-alpha-D-galactosamine:polypeptide N-acetylgalactosaminyltransferase 2 (GalNAc-T2)
hsa-miR-30e	NM_004472	FOXD1	forkhead box D1
hsa-miR-30e	NM_004460	FAP	fibroblast activation protein, alpha
hsa-miR-30e	NM_004449	ERG	v-ets erythroblastosis virus E26 oncogene homolog (avian)
hsa-miR-30e	NM_004331	BNIP3L	BCL2/adenovirus E1B 19kDa interacting protein 3-like
hsa-miR-30e	NM_004209	SYNGR3	synaptogyrin 3
hsa-miR-30e	NM_004171	SLC1A2	solute carrier family 1 (glial high affinity glutamate transporter), member 2
hsa-miR-30e	NM_004165	RRAD	Ras-related associated with diabetes
hsa-miR-30e	NM_004040	RHOB	ras homolog gene family, member B
hsa-miR-30e	NM_002544	OMG	oligodendrocyte myelin glycoprotein
hsa-miR-30e	NM_002526	NT5E	5"-nucleotidase, ecto (CD73)
hsa-miR-30e	NM_002480	PPP1R12A	protein phosphatase 1, regulatory (inhibitor) subunit 12A
hsa-miR-30e	NM_001001549	GRB10	growth factor receptor-bound protein 10
hsa-miR-30e	NM_001001331	ATP2B2	ATPase, Ca++ transporting, plasma membrane 2
hsa-miR-30e	NM_000966	RARG	retinoic acid receptor, gamma
hsa-miR-30e	NM_000965	RARB	retinoic acid receptor, beta
hsa-miR-30e	NM_000842	GRM5	glutamate receptor, metabotropic 5
hsa-miR-30e	NM_000724	CACNB2	calcium channel, voltage-dependent, beta 2 subunit
hsa-miR-30e	NM_000555	DCX	doublecortex; lissencephaly, X-linked (doublecortin)
hsa-miR-30e	NM_000346	SOX9	SRY (sex determining region Y)-box 9 (campomelic dysplasia, autosomal sex-reversal)
hsa-miR-30e	NM_000210	ITGA6	integrin, alpha 6
hsa-miR-30e	NM_001001933	LHX8	LIM homeobox 8
hsa-miR-30e	NM_001002257	LYCAT	lysocardiolipin acyltransferase
hsa-miR-30e	NM_001198	PRDM1	PR domain containing 1, with ZNF domain
hsa-miR-30e	NM_002460	IRF4	interferon regulatory factor 4
hsa-miR-30e	NM_001717	BNC1	basonuclin 1
hsa-miR-30e	NM_001682	ATP2B1	ATPase, Ca++ transporting, plasma membrane 1
hsa-miR-30e	NM_001660	ARF4	ADP-ribosylation factor 4
hsa-miR-30e	NM_001407	CELSR3	cadherin, EGF LAG seven-pass G-type receptor 3 (flamingo homolog, Drosophila)
hsa-miR-30e	NM_001386	DPYSL2	dihydropyrimidinase-like 2
hsa-miR-30e	NM_001332	CTNND2	catenin (cadherin-associated protein), delta 2 (neural plakophilin-related arm-repeat protein)
hsa-miR-30e	NM_001241	CCNT2	cyclin T2
hsa-miR-30e	NM_001206	KLF9	Kruppel-like factor 9
hsa-miR-30e	NM_000170	GLDC	glycine dehydrogenase (decarboxylating)
hsa-miR-30e	NM_015277	NEDD4L	neural precursor cell expressed, developmentally down-regulated 4-like
hsa-miR-30e	NM_013233	STK39	serine threonine kinase 39 (STE20/SPS1 homolog, yeast)
hsa-miR-30e	NM_012465	TLL2	tolloid-like 2
hsa-miR-30e	NM_012287	CENTB2	centaurin, beta 2
hsa-miR-30e	NM_012238	SIRT1	sirtuin (silent mating type information regulation 2 homolog) 1 (S. cerevisiae)
hsa-miR-30e	NM_012137	DDAH1	dimethylarginine dimethylaminohydrolase 1
hsa-miR-30e	NM_012081	ELL2	elongation factor, RNA polymerase II, 2
hsa-miR-30e	NM_007185	TNRC4	trinucleotide repeat containing 4
hsa-miR-30e	NM_007023	RAPGEF4	Rap guanine nucleotide exchange factor (GEF) 4
hsa-miR-30e	NM_007007	CPSF6	cleavage and polyadenylation specific factor 6, 68kDa
hsa-miR-30e	NM_014021	SSX2IP	synovial sarcoma, X breakpoint 2 interacting protein
hsa-miR-30e	NM_014043	CHMP2B	chromatin modifying protein 2B
hsa-miR-30e	NM_014191	SCN8A	sodium channel, voltage gated, type VIII, alpha subunit
hsa-miR-30e	NM_015236	LPHN3	latrophilin 3
hsa-miR-30e	NM_015215	CAMTA1	calmodulin binding transcription activator 1
hsa-miR-30e	NM_015008	TMCC1	transmembrane and coiled-coil domain family 1
hsa-miR-30e	NM_014876	JOSD1	Josephin domain containing 1
hsa-miR-30e	NM_014757	MAML1	mastermind-like 1 (Drosophila)
hsa-miR-30e	NM_014577	BRD1	bromodomain containing 1
hsa-miR-30e	NM_014494	TNRC6A	trinucleotide repeat containing 6A
hsa-miR-30e	NM_014458	KLHL20	kelch-like 20 (Drosophila)
hsa-miR-30e	NM_014243	ADAMTS3	ADAM metallopeptidase with thrombospondin type 1 motif, 3
hsa-miR-30e	NM_006943	SOX12	SRY (sex determining region Y)-box 12
hsa-miR-30e	NM_006834	RAB32	RAB32, member RAS oncogene family
hsa-miR-30e	NM_006754	SYPL1	synaptophysin-like 1
hsa-miR-30e	NM_005736	ACTR1A	ARP1 actin-related protein 1 homolog A, centractin alpha (yeast)
hsa-miR-30e	NM_005668	ST8SIA4	ST8 alpha-N-acetyl-neuraminide alpha-2,8-sialyltransferase 4
hsa-miR-30e	NM_005596	NFIB	nuclear factor I/B
hsa-miR-30e	NM_005522	HOXA1	homeobox A1
hsa-miR-30e	NM_005316	GTF2H1	general transcription factor IIH, polypeptide 1, 62kDa
hsa-miR-30e	NM_005159	ACTC1	actin, alpha, cardiac muscle 1
hsa-miR-30e	NM_004898	CLOCK	clock homolog (mouse)
hsa-miR-30e	NM_004849	ATG5	ATG5 autophagy related 5 homolog (S. cerevisiae)
hsa-miR-30e	NM_004737	LARGE	like-glycosyltransferase
hsa-miR-30e	NM_005911	MAT2A	methionine adenosyltransferase II, alpha
hsa-miR-30e	NM_006007	ZFAND5	zinc finger, AN1-type domain 5
hsa-miR-30e	NM_006080	SEMA3A	sema domain, immunoglobulin domain (Ig), short basic domain, secreted, (semaphorin) 3A
hsa-miR-30e	NM_006699	MAN1A2	mannosidase, alpha, class 1A, member 2
hsa-miR-30e	NM_006599	NFAT5	nuclear factor of activated T-cells 5, tonicity-responsive
hsa-miR-30e	NM_006459	ERLIN1	ER lipid raft associated 1
hsa-miR-30e	NM_006375	ENOX2	ecto-NOX disulfide-thiol exchanger 2
hsa-miR-30e	NM_006373	VAT1	vesicle amine transport protein 1 homolog (T. californica)
hsa-miR-30e	NM_006352	ZNF238	zinc finger protein 238
hsa-miR-30e	NM_006264	PTPN13	protein tyrosine phosphatase, non-receptor type 13 (APO-1/CD95 (Fas)-associated phosphatase)
hsa-miR-30e	NM_006186	NR4A2	nuclear receptor subfamily 4, group A, member 2
hsa-miR-30e	NM_006135	CAPZA1	capping protein (actin filament) muscle Z-line, alpha 1
hsa-miR-30e	NM_004736	XPR1	xenotropic and polytropic retrovirus receptor
hsa-miR-324-5p	NM_001419	ELAVL1	ELAV (embryonic lethal, abnormal vision, Drosophila)-like 1 (Hu antigen R)
hsa-miR-324-5p	NM_173078	SLITRK4	SLIT and NTRK-like family, member 4
hsa-miR-324-5p	NM_133433	NIPBL	Nipped-B homolog (Drosophila)
hsa-miR-324-5p	NM_053023	ZFP91	zinc finger protein 91 homolog (mouse)
hsa-miR-324-5p	NM_025133	FBXO11	F-box protein 11
hsa-miR-324-5p	NM_020235	BBX	bobby sox homolog (Drosophila)
hsa-miR-324-5p	NM_019106	2011-09-03	septin 3
hsa-miR-324-5p	NM_015008	TMCC1	transmembrane and coiled-coil domain family 1
hsa-miR-324-5p	NM_006325	RAN	RAN, member RAS oncogene family
hsa-miR-324-5p	NM_003618	MAP4K3	mitogen-activated protein kinase kinase kinase kinase 3
hsa-miR-324-5p	NM_003374	VDAC1	voltage-dependent anion channel 1
hsa-miR-324-5p	NM_002585	PBX1	pre-B-cell leukemia homeobox 1
hsa-miR-324-5p	NM_181491	MED22	mediator complex subunit 22
hsa-miR-7	NM_000168	GLI3	GLI-Kruppel family member GLI3 (Greig cephalopolysyndactyly syndrome)
hsa-miR-7	NM_015455	CNOT6	CCR4-NOT transcription complex, subunit 6
hsa-miR-7	NM_016338	IPO11	importin 11
hsa-miR-7	NM_016376	ANKFY1	ankyrin repeat and FYVE domain containing 1
hsa-miR-7	NM_016422	RNF141	ring finger protein 141
hsa-miR-7	NM_017423	GALNT7	UDP-N-acetyl-alpha-D-galactosamine:polypeptide N-acetylgalactosaminyltransferase 7 (GalNAc-T7)
hsa-miR-7	NM_018364	RSBN1	round spermatid basic protein 1
hsa-miR-7	NM_018660	ZNF395	zinc finger protein 395
hsa-miR-7	NM_018976	SLC38A2	solute carrier family 38, member 2
hsa-miR-7	NM_019058	DDIT4	DNA-damage-inducible transcript 4
hsa-miR-7	NM_019896	POLE4	polymerase (DNA-directed), epsilon 4 (p12 subunit)
hsa-miR-7	NM_020382	SETD8	SET domain containing (lysine methyltransferase) 8
hsa-miR-7	NM_022373	HERPUD2	HERPUD family member 2
hsa-miR-7	NM_030625	TET1	tet oncogene 1
hsa-miR-7	NM_032436	ZNF828	zinc finger protein 828
hsa-miR-7	NM_052900	CSMD3	CUB and Sushi multiple domains 3
hsa-miR-7	NM_138473	SP1	Sp1 transcription factor
hsa-miR-7	NM_145049	UBLCP1	ubiquitin-like domain containing CTD phosphatase 1
hsa-miR-7	NM_014319	LEMD3	LEM domain containing 3
hsa-miR-7	NM_006825	CKAP4	cytoskeleton-associated protein 4
hsa-miR-7	NM_006038	SPATA2	spermatogenesis associated 2
hsa-miR-7	NM_000321	RB1	retinoblastoma 1 (including osteosarcoma)
hsa-miR-7	NM_000891	KCNJ2	potassium inwardly-rectifying channel, subfamily J, member 2
hsa-miR-7	NM_001001331	ATP2B2	ATPase, Ca++ transporting, plasma membrane 2
hsa-miR-7	NM_001219	CALU	calumenin
hsa-miR-7	NM_001438	ESRRG	estrogen-related receptor gamma
hsa-miR-7	NM_001660	ARF4	ADP-ribosylation factor 4
hsa-miR-7	NM_001844	COL2A1	collagen, type II, alpha 1
hsa-miR-7	NM_002264	KPNA1	karyopherin alpha 1 (importin alpha 5)
hsa-miR-7	NM_002668	PLP2	proteolipid protein 2 (colonic epithelium-enriched)
hsa-miR-7	NM_002880	RAF1	v-raf-1 murine leukemia viral oncogene homolog 1
hsa-miR-7	NM_002892	ARID4A	AT rich interactive domain 4A (RBP1-like)
hsa-miR-7	NM_002971	SATB1	SATB homeobox 1
hsa-miR-7	NM_003374	VDAC1	voltage-dependent anion channel 1
hsa-miR-7	NM_003684	MKNK1	MAP kinase interacting serine/threonine kinase 1
hsa-miR-7	NM_004235	KLF4	Kruppel-like factor 4 (gut)
hsa-miR-7	NM_004779	CNOT8	CCR4-NOT transcription complex, subunit 8
hsa-miR-7	NM_005789	PSME3	proteasome (prosome, macropain) activator subunit 3 (PA28 gamma; Ki)
hsa-miR-7	NM_170679	SKP1	S-phase kinase-associated protein 1
hsa-miR-93	NM_199420	POLQ	polymerase (DNA directed), theta
hsa-miR-93	NM_024554	PGBD5	piggyBac transposable element derived 5
hsa-miR-93	NM_023067	FOXL2	forkhead box L2
hsa-miR-93	NM_022898	BCL11B	B-cell CLL/lymphoma 11B (zinc finger protein)
hsa-miR-93	NM_021964	ZNF148	zinc finger protein 148
hsa-miR-93	NM_021945	SLC22A23	solute carrier family 22, member 23
hsa-miR-93	NM_021914	CFL2	cofilin 2 (muscle)
hsa-miR-93	NM_021229	NTN4	netrin 4
hsa-miR-93	NM_021137	TNFAIP1	tumor necrosis factor, alpha-induced protein 1 (endothelial)
hsa-miR-93	NM_021090	MTMR3	myotubularin related protein 3
hsa-miR-93	NM_021035	ZNFX1	zinc finger, NFX1-type containing 1
hsa-miR-93	NM_020673	RAB22A	RAB22A, member RAS oncogene family
hsa-miR-93	NM_020211	RGMA	RGM domain family, member A
hsa-miR-93	NM_018646	TRPV6	transient receptor potential cation channel, subfamily V, member 6
hsa-miR-93	NM_018584	CAMK2N1	calcium/calmodulin-dependent protein kinase II inhibitor 1
hsa-miR-93	NM_018364	RSBN1	round spermatid basic protein 1
hsa-miR-93	NM_024692	CLIP4	CAP-GLY domain containing linker protein family, member 4
hsa-miR-93	NM_025235	TNKS2	tankyrase, TRF1-interacting ankyrin-related ADP-ribose polymerase 2
hsa-miR-93	NM_199324	OTUD4	OTU domain containing 4
hsa-miR-93	NM_199160	LHX6	LIM homeobox 6
hsa-miR-93	NM_198990	NAPEPLD	N-acyl phosphatidylethanolamine phospholipase D
hsa-miR-93	NM_198215	FAM13C1	family with sequence similarity 13, member C1
hsa-miR-93	NM_182763	MCL1	myeloid cell leukemia sequence 1 (BCL2-related)
hsa-miR-93	NM_182501	MTERFD2	MTERF domain containing 2
hsa-miR-93	NM_176814	ZNF800	zinc finger protein 800
hsa-miR-93	NM_152758	YTHDF3	YTH domain family, member 3
hsa-miR-93	NM_152735	ZBTB9	zinc finger and BTB domain containing 9
hsa-miR-93	NM_145166	ZBTB47	zinc finger and BTB domain containing 47
hsa-miR-93	NM_139280	ORMDL3	ORM1-like 3 (S. cerevisiae)
hsa-miR-93	NM_053023	ZFP91	zinc finger protein 91 homolog (mouse)
hsa-miR-93	NM_032505	KBTBD8	kelch repeat and BTB (POZ) domain containing 8
hsa-miR-93	NM_031942	CDCA7	cell division cycle associated 7
hsa-miR-93	NM_030637	DDHD1	DDHD domain containing 1
hsa-miR-93	NM_017637	BNC2	basonuclin 2
hsa-miR-93	NM_017635	SUV420H1	suppressor of variegation 4-20 homolog 1 (Drosophila)
hsa-miR-93	NM_017553	INOC1	INO80 complex homolog 1 (S. cerevisiae)
hsa-miR-93	NM_006186	NR4A2	nuclear receptor subfamily 4, group A, member 2
hsa-miR-93	NM_005378	MYCN	v-myc myelocytomatosis viral related oncogene, neuroblastoma derived (avian)
hsa-miR-93	NM_004956	ETV1	ets variant gene 1
hsa-miR-93	NM_004755	RPS6KA5	ribosomal protein S6 kinase, 90kDa, polypeptide 5
hsa-miR-93	NM_004418	DUSP2	dual specificity phosphatase 2
hsa-miR-93	NM_003565	ULK1	unc-51-like kinase 1 (C. elegans)
hsa-miR-93	NM_003337	UBE2B	ubiquitin-conjugating enzyme E2B (RAD6 homolog)
hsa-miR-93	NM_002892	ARID4A	AT rich interactive domain 4A (RBP1-like)
hsa-miR-93	NM_002752	MAPK9	mitogen-activated protein kinase 9
hsa-miR-93	NM_002628	PFN2	profilin 2
hsa-miR-93	NM_002214	ITGB8	integrin, beta 8
hsa-miR-93	NM_002126	HLF	hepatic leukemia factor
hsa-miR-93	NM_001002265	2011-03-08	membrane-associated ring finger (C3HC4) 8
hsa-miR-93	NM_001001481	UBE2W	ubiquitin-conjugating enzyme E2W (putative)
hsa-miR-93	NM_000945	PPP3R1	protein phosphatase 3 (formerly 2B), regulatory subunit B, alpha isoform
hsa-miR-93	NM_006352	ZNF238	zinc finger protein 238
hsa-miR-93	NM_006981	NR4A3	nuclear receptor subfamily 4, group A, member 3
hsa-miR-93	NM_016374	ARID4B	AT rich interactive domain 4B (RBP1-like)
hsa-miR-93	NM_016339	RAPGEFL1	Rap guanine nucleotide exchange factor (GEF)-like 1
hsa-miR-93	NM_016041	DERL2	Der1-like domain family, member 2
hsa-miR-93	NM_015898	ZBTB7A	zinc finger and BTB domain containing 7A
hsa-miR-93	NM_015215	CAMTA1	calmodulin binding transcription activator 1
hsa-miR-93	NM_015075	IQSEC2	IQ motif and Sec7 domain 2
hsa-miR-93	NM_014109	ATAD2	ATPase family, AAA domain containing 2
hsa-miR-93	NM_014023	WDR37	WD repeat domain 37
hsa-miR-93	NM_013446	MKRN1	makorin, ring finger protein, 1
hsa-miR-93	NM_012342	BAMBI	BMP and activin membrane-bound inhibitor homolog (Xenopus laevis)
hsa-miR-93	NM_012308	FBXL11	F-box and leucine-rich repeat protein 11
hsa-miR-93	NM_012199	EIF2C1	eukaryotic translation initiation factor 2C, 1
hsa-miR-93	NM_012082	ZFPM2	zinc finger protein, multitype 2
hsa-miR-93	NM_007275	TUSC2	tumor suppressor candidate 2
hsa-miR-93	NM_007249	KLF12	Kruppel-like factor 12
hsa-miR-93	NM_000125	ESR1	estrogen receptor 1
hsa-miR-181b	NM_014293	NPTXR	neuronal pentraxin receptor
hsa-miR-181b	NM_015630	EPC2	enhancer of polycomb homolog 2 (Drosophila)
hsa-miR-181b	NM_015635	GAPVD1	GTPase activating protein and VPS9 domains 1
hsa-miR-181b	NM_016217	HECA	headcase homolog (Drosophila)
hsa-miR-181b	NM_016603	FAM13B1	family with sequence similarity 13, member B1
hsa-miR-181b	NM_017632	CDKN2AIP	CDKN2A interacting protein
hsa-miR-181b	NM_017893	SEMA4G	sema domain, immunoglobulin domain (Ig), transmembrane domain (TM) and short cytoplasmic domain, (semaphorin) 4G
hsa-miR-181b	NM_018043	TMEM16A	transmembrane protein 16A
hsa-miR-181b	NM_018323	PI4K2B	phosphatidylinositol 4-kinase type 2 beta
hsa-miR-181b	NM_018704	CTTNBP2NL	CTTNBP2 N-terminal like
hsa-miR-181b	NM_018898	PCDHAC1	protocadherin alpha subfamily C, 1
hsa-miR-181b	NM_018899	PCDHAC2	protocadherin alpha subfamily C, 2
hsa-miR-181b	NM_018900	PCDHA1	protocadherin alpha 1
hsa-miR-181b	NM_018901	PCDHA10	protocadherin alpha 10
hsa-miR-181b	NM_018903	PCDHA12	protocadherin alpha 12
hsa-miR-181b	NM_018906	PCDHA3	protocadherin alpha 3
hsa-miR-181b	NM_018907	PCDHA4	protocadherin alpha 4
hsa-miR-181b	NM_018908	PCDHA5	protocadherin alpha 5
hsa-miR-181b	NM_015550	OSBPL3	oxysterol binding protein-like 3
hsa-miR-181b	NM_015429	ABI3BP	ABI gene family, member 3 (NESH) binding protein
hsa-miR-181b	NM_015282	CLASP1	cytoplasmic linker associated protein 1
hsa-miR-181b	NM_014319	LEMD3	LEM domain containing 3
hsa-miR-181b	NM_014504	RABGEF1	RAB guanine nucleotide exchange factor (GEF) 1
hsa-miR-181b	NM_014517	UBP1	upstream binding protein 1 (LBP-1a)
hsa-miR-181b	NM_014729	TOX	thymocyte selection-associated high mobility group box
hsa-miR-181b	NM_014764	DAZAP2	DAZ associated protein 2
hsa-miR-181b	NM_014779	TSC22D2	TSC22 domain family, member 2
hsa-miR-181b	NM_014802	KIAA0528	KIAA0528
hsa-miR-181b	NM_014905	GLS	glutaminase
hsa-miR-181b	NM_014962	BTBD3	BTB (POZ) domain containing 3
hsa-miR-181b	NM_015091	KIAA0423	KIAA0423
hsa-miR-181b	NM_015094	HIC2	hypermethylated in cancer 2
hsa-miR-181b	NM_015141	GPD1L	glycerol-3-phosphate dehydrogenase 1-like
hsa-miR-181b	NM_015153	PHF3	PHD finger protein 3
hsa-miR-181b	NM_015158	KANK1	KN motif and ankyrin repeat domains 1
hsa-miR-181b	NM_015173	TBC1D1	TBC1 (tre-2/USP6, BUB2, cdc16) domain family, member 1
hsa-miR-181b	NM_015216	HISPPD1	histidine acid phosphatase domain containing 1
hsa-miR-181b	NM_015271	TRIM2	tripartite motif-containing 2
hsa-miR-181b	NM_018909	PCDHA6	protocadherin alpha 6
hsa-miR-181b	NM_018911	PCDHA8	protocadherin alpha 8
hsa-miR-181b	NM_019006	ZFAND6	zinc finger, AN1-type domain 6
hsa-miR-181b	NM_144642	SYNPR	synaptoporin
hsa-miR-181b	NM_144778	MBNL2	muscleblind-like 2 (Drosophila)
hsa-miR-181b	NM_145735	ARHGEF7	Rho guanine nucleotide exchange factor (GEF) 7
hsa-miR-181b	NM_152271	LONRF1	LON peptidase N-terminal domain and ring finger 1
hsa-miR-181b	NM_152737	RNF182	ring finger protein 182
hsa-miR-181b	NM_152991	EED	embryonic ectoderm development
hsa-miR-181b	NM_153267	MAMDC2	MAM domain containing 2
hsa-miR-181b	NM_153689	FLJ38973	hypothetical protein FLJ38973
hsa-miR-181b	NM_170662	CBLB	Cas-Br-M (murine) ecotropic retroviral transforming sequence b
hsa-miR-181b	NM_176814	ZNF800	zinc finger protein 800
hsa-miR-181b	NM_178496	C3orf59	chromosome 3 open reading frame 59
hsa-miR-181b	NM_178565	RSPO2	R-spondin 2 homolog (Xenopus laevis)
hsa-miR-181b	NM_197941	ADAMTS6	ADAM metallopeptidase with thrombospondin type 1 motif, 6
hsa-miR-181b	NM_198581	ZC3H6	zinc finger CCCH-type containing 6
hsa-miR-181b	NM_198935	SS18L1	synovial sarcoma translocation gene on chromosome 18-like 1
hsa-miR-181b	NM_198963	DHX57	DEAH (Asp-Glu-Ala-Asp/His) box polypeptide 57
hsa-miR-181b	NM_199324	OTUD4	OTU domain containing 4
hsa-miR-181b	NM_052910	SLITRK1	SLIT and NTRK-like family, member 1
hsa-miR-181b	NM_033407	DOCK7	dedicator of cytokinesis 7
hsa-miR-181b	NM_033224	PURB	purine-rich element binding protein B
hsa-miR-181b	NM_020357	PCNP	PEST proteolytic signal containing nuclear protein
hsa-miR-181b	NM_020873	LRRN1	leucine rich repeat neuronal 1
hsa-miR-181b	NM_020899	ZBTB4	zinc finger and BTB domain containing 4
hsa-miR-181b	NM_022062	PKNOX2	PBX/knotted 1 homeobox 2
hsa-miR-181b	NM_022658	HOXC8	homeobox C8
hsa-miR-181b	NM_022894	PAPOLG	poly(A) polymerase gamma
hsa-miR-181b	NM_024295	DERL1	Der1-like domain family, member 1
hsa-miR-181b	NM_024590	ARSJ	arylsulfatase family, member J
hsa-miR-181b	NM_025126	RNF34	ring finger protein 34
hsa-miR-181b	NM_030627	CPEB4	cytoplasmic polyadenylation element binding protein 4
hsa-miR-181b	NM_030939	C6orf62	chromosome 6 open reading frame 62
hsa-miR-181b	NM_030964	SPRY4	sprouty homolog 4 (Drosophila)
hsa-miR-181b	NM_032105	PPP1R12B	protein phosphatase 1, regulatory (inhibitor) subunit 12B
hsa-miR-181b	NM_032547	SCOC	short coiled-coil protein
hsa-miR-181b	NM_032682	FOXP1	forkhead box P1
hsa-miR-181b	NM_032804	ADO	2-aminoethanethiol (cysteamine) dioxygenase
hsa-miR-181b	NM_033071	SYNE1	spectrin repeat containing, nuclear envelope 1
hsa-miR-181b	NM_203394	E2F7	E2F transcription factor 7
hsa-miR-181b	NM_013437	LRP12	low density lipoprotein-related protein 12
hsa-miR-181b	NM_000176	NR3C1	nuclear receptor subfamily 3, group C, member 1 (glucocorticoid receptor)
hsa-miR-181b	NM_001677	ATP1B1	ATPase, Na+/K+ transporting, beta 1 polypeptide
hsa-miR-181b	NM_001682	ATP2B1	ATPase, Ca++ transporting, plasma membrane 1
hsa-miR-181b	NM_001704	BAI3	brain-specific angiogenesis inhibitor 3
hsa-miR-181b	NM_001967	EIF4A2	eukaryotic translation initiation factor 4A, isoform 2
hsa-miR-181b	NM_001987	ETV6	ets variant gene 6 (TEL oncogene)
hsa-miR-181b	NM_001995	ACSL1	acyl-CoA synthetase long-chain family member 1
hsa-miR-181b	NM_002126	HLF	hepatic leukemia factor
hsa-miR-181b	NM_002204	ITGA3	integrin, alpha 3 (antigen CD49C, alpha 3 subunit of VLA-3 receptor)
hsa-miR-181b	NM_002214	ITGB8	integrin, beta 8
hsa-miR-181b	NM_002265	KPNB1	karyopherin (importin) beta 1
hsa-miR-181b	NM_002296	LBR	lamin B receptor
hsa-miR-181b	NM_002390	ADAM11	ADAM metallopeptidase domain 11
hsa-miR-181b	NM_002515	NOVA1	neuro-oncological ventral antigen 1
hsa-miR-181b	NM_002583	PAWR	PRKC, apoptosis, WT1, regulator
hsa-miR-181b	NM_002655	PLAG1	pleiomorphic adenoma gene 1
hsa-miR-181b	NM_002833	PTPN9	protein tyrosine phosphatase, non-receptor type 9
hsa-miR-181b	NM_003155	STC1	stanniocalcin 1
hsa-miR-181b	NM_001616	ACVR2A	activin A receptor, type IIA
hsa-miR-181b	NM_001497	B4GALT1	UDP-Gal:betaGlcNAc beta 1,4- galactosyltransferase, polypeptide 1
hsa-miR-181b	NM_001427	EN2	engrailed homeobox 2
hsa-miR-181b	NM_000332	ATXN1	ataxin 1
hsa-miR-181b	NM_000358	TGFBI	transforming growth factor, beta-induced, 68kDa
hsa-miR-181b	NM_000362	TIMP3	TIMP metallopeptidase inhibitor 3 (Sorsby fundus dystrophy, pseudoinflammatory)
hsa-miR-181b	NM_000575	IL1A	interleukin 1, alpha
hsa-miR-181b	NM_000616	CD4	CD4 molecule
hsa-miR-181b	NM_000724	CACNB2	calcium channel, voltage-dependent, beta 2 subunit
hsa-miR-181b	NM_000801	FKBP1A	FK506 binding protein 1A, 12kDa
hsa-miR-181b	NM_000806	GABRA1	gamma-aminobutyric acid (GABA) A receptor, alpha 1
hsa-miR-181b	NM_000842	GRM5	glutamate receptor, metabotropic 5
hsa-miR-181b	NM_000919	PAM	peptidylglycine alpha-amidating monooxygenase
hsa-miR-181b	NM_000945	PPP3R1	protein phosphatase 3 (formerly 2B), regulatory subunit B, alpha isoform
hsa-miR-181b	NM_001001331	ATP2B2	ATPase, Ca++ transporting, plasma membrane 2
hsa-miR-181b	NM_001001395	LMO3	LIM domain only 3 (rhombotin-like 2)
hsa-miR-181b	NM_001002257	LYCAT	lysocardiolipin acyltransferase
hsa-miR-181b	NM_001004317	LIN28B	lin-28 homolog B (C. elegans)
hsa-miR-181b	NM_001304	CPD	carboxypeptidase D
hsa-miR-181b	NM_001386	DPYSL2	dihydropyrimidinase-like 2
hsa-miR-181b	NM_003337	UBE2B	ubiquitin-conjugating enzyme E2B (RAD6 homolog)
hsa-miR-181b	NM_003590	CUL3	cullin 3
hsa-miR-181b	NM_003607	CDC42BPA	CDC42 binding protein kinase alpha (DMPK-like)
hsa-miR-181b	NM_006206	PDGFRA	platelet-derived growth factor receptor, alpha polypeptide
hsa-miR-181b	NM_006254	PRKCD	protein kinase C, delta
hsa-miR-181b	NM_006265	RAD21	RAD21 homolog (S. pombe)
hsa-miR-181b	NM_006310	NPEPPS	aminopeptidase puromycin sensitive
hsa-miR-181b	NM_006420	ARFGEF2	ADP-ribosylation factor guanine nucleotide-exchange factor 2 (brefeldin A-inhibited)
hsa-miR-181b	NM_006540	NCOA2	nuclear receptor coactivator 2
hsa-miR-181b	NM_006599	NFAT5	nuclear factor of activated T-cells 5, tonicity-responsive
hsa-miR-181b	NM_006726	LRBA	LPS-responsive vesicle trafficking, beach and anchor containing
hsa-miR-181b	NM_006940	SOX5	SRY (sex determining region Y)-box 5
hsa-miR-181b	NM_006981	NR4A3	nuclear receptor subfamily 4, group A, member 3
hsa-miR-181b	NM_007246	KLHL2	kelch-like 2, Mayven (Drosophila)
hsa-miR-181b	NM_007375	TARDBP	TAR DNA binding protein
hsa-miR-181b	NM_012238	SIRT1	sirtuin (silent mating type information regulation 2 homolog) 1 (S. cerevisiae)
hsa-miR-181b	NM_012287	CENTB2	centaurin, beta 2
hsa-miR-181b	NM_012297	G3BP2	GTPase activating protein (SH3 domain) binding protein 2
hsa-miR-181b	NM_012421	RLF	rearranged L-myc fusion
hsa-miR-181b	NM_012479	YWHAG	tyrosine 3-monooxygenase/tryptophan 5-monooxygenase activation protein, gamma polypeptide
hsa-miR-181b	NM_006141	DYNC1LI2	dynein, cytoplasmic 1, light intermediate chain 2
hsa-miR-181b	NM_005911	MAT2A	methionine adenosyltransferase II, alpha
hsa-miR-181b	NM_005668	ST8SIA4	ST8 alpha-N-acetyl-neuraminide alpha-2,8-sialyltransferase 4
hsa-miR-181b	NM_003629	PIK3R3	phosphoinositide-3-kinase, regulatory subunit 3 (gamma)
hsa-miR-181b	NM_003670	BHLHB2	basic helix-loop-helix domain containing, class B, 2
hsa-miR-181b	NM_003749	IRS2	insulin receptor substrate 2
hsa-miR-181b	NM_004274	AKAP6	A kinase (PRKA) anchor protein 6
hsa-miR-181b	NM_004663	RAB11A	RAB11A, member RAS oncogene family
hsa-miR-181b	NM_004801	NRXN1	neurexin 1
hsa-miR-181b	NM_004808	NMT2	N-myristoyltransferase 2
hsa-miR-181b	NM_004849	ATG5	ATG5 autophagy related 5 homolog (S. cerevisiae)
hsa-miR-181b	NM_004922	SEC24C	SEC24 related gene family, member C (S. cerevisiae)
hsa-miR-181b	NM_004926	ZFP36L1	zinc finger protein 36, C3H type-like 1
hsa-miR-181b	NM_005065	SEL1L	sel-1 suppressor of lin-12-like (C. elegans)
hsa-miR-181b	NM_005257	GATA6	GATA binding protein 6
hsa-miR-181b	NM_005400	PRKCE	protein kinase C, epsilon
hsa-miR-181b	NM_005512	LRRC32	leucine rich repeat containing 32
hsa-miR-181b	NM_005523	HOXA11	homeobox A11
hsa-miR-181b	NM_005539	INPP5A	inositol polyphosphate-5-phosphatase, 40kDa
hsa-miR-181b	NM_005578	LPP	LIM domain containing preferred translocation partner in lipoma
hsa-miR-181b	NM_013372	GREM1	gremlin 1, cysteine knot superfamily, homolog (Xenopus laevis)
