# Supplementary material for: MicroRNA Expression and Regulation in Human Ovarian Carcinoma Cells by Luteinizing Hormone
Source: PLoS One. 2011 Jul 12;6(7):e21730. doi: 10.1371/journal.pone.0021730 (PMC3134471; doi:10.1371/journal.pone.0021730)
Supplement: Table S5 — Correlation between microRNAs and cancer genes. (XLSX) [file pone.0021730.s005.xlsx]

## Sheet: Sheet1
# Table S5 Correlation between microRNA and cancer genes
			Fold change				Fold change
miRNA	Gene Symbol	Target Description	LHR	LH	Cancer gene	Gene Symbol	LHR	LH	RefSeq Transcript ID	Target Description	rho
OC3SNGnh.7187_at	MIRN554	microRNA 554		1.76	OC3P.5320.C1_s_at	VHL		1.54	NM_198156.1	von Hippel-Lindau tumor suppressor	0.984
OC3SNGnh.14368_at	MIRN614	microRNA 614		-1.76	OC3P.7402.C1_s_at	VHL		-1.79	NM_198156.1	von Hippel-Lindau tumor suppressor	0.949064
OC3SNGnh.13214_at	MIRN101-2	microRNA 101-2	1.95404	-1.79	OC3P.7402.C2_x_at	VHL			NM_198156.1	von Hippel-Lindau tumor suppressor	0.942958
OCADNP.15201_s_at	MIRN661	microRNA 661		-1.86	OC3P.7402.C1_s_at	VHL		-1.79	NM_198156.1	von Hippel-Lindau tumor suppressor	0.937847
OC3SNGnh.5613_x_at	GPR162	microRNA 200c		2.05	OC3P.5320.C1_s_at	VHL		1.54	NM_198156.1	von Hippel-Lindau tumor suppressor	0.930163
OCRS2.551_x_at	MIRN129-1	microRNA 129-1			OC3P.5320.C1_s_at	VHL		1.54	NM_198156.1	von Hippel-Lindau tumor suppressor	0.908386
OC3P.3864.C1_at	MIRN555	microRNA 555		-1.5	OC3P.7402.C1_s_at	VHL		-1.79	NM_198156.1	von Hippel-Lindau tumor suppressor	0.897697
OCUTR.226_x_at	MIRN301B	microRNA 301b		1.55	OC3P.5320.C1_s_at	VHL		1.54	NM_198156.1	von Hippel-Lindau tumor suppressor	0.892843
OCADNP.1035_s_at	MIRN659	microRNA 659		-1.54	OC3P.5320.C1_s_at	VHL		1.54	NM_198156.1	von Hippel-Lindau tumor suppressor	0.892356
OCADNP.15201_s_at	MIRN661	microRNA 661		-1.86	OC3P.5320.C1_s_at	VHL		1.54	NM_198156.1	von Hippel-Lindau tumor suppressor	0.891175
OC3SNGnh.8370_at	MIRN138-2	microRNA 138-2			OC3P.5320.C1_s_at	VHL		1.54	NM_198156.1	von Hippel-Lindau tumor suppressor	0.881389
OC3SNGnh.8263_at	MIRN449B	microRNA 449b			OC3SNGn.6983-3a_s_at	VHL			NM_198156.1	von Hippel-Lindau tumor suppressor	0.880965
OC3P.11403.C1_s_at	GPR162	microRNA 200c	-1.8663	-1.63	OC3SNGnh.18660_x_at	VHL			NM_198156.1	von Hippel-Lindau tumor suppressor	0.875139
OC3SNGnh.14278_at	MIRN339	microRNA 339		1.64	OC3P.5320.C1_s_at	VHL		1.54	NM_198156.1	von Hippel-Lindau tumor suppressor	0.86615
OCMX.8490.C1_at	MIRN139	microRNA 139		1.55	OC3P.5320.C1_s_at	VHL		1.54	NM_198156.1	von Hippel-Lindau tumor suppressor	0.86018
OC3SNGnh.14368_at	MIRN614	microRNA 614		-1.76	OC3P.5320.C1_s_at	VHL		1.54	NM_198156.1	von Hippel-Lindau tumor suppressor	0.85983
OC3SNGnh.6784_at	MIRN33A	microRNA 33a		1.52	OC3SNGnh.20028_x_at	VHL			NM_198156.1	von Hippel-Lindau tumor suppressor	0.852184
OC3SNGnh.17094_at	MIRN611	microRNA 611		-1.55	OC3P.7402.C1_s_at	VHL		-1.79	NM_198156.1	von Hippel-Lindau tumor suppressor	0.84688
OC3SNGnh.7187_at	MIRN554	microRNA 554		1.76	OC3P.7402.C1_s_at	VHL		-1.79	NM_198156.1	von Hippel-Lindau tumor suppressor	0.845579
OC3SNGnh.5421_at	MIRN561	microRNA 561	-2.17845		OC3SNGn.3973-331a_s_at	VHL			NM_198156.1	von Hippel-Lindau tumor suppressor	0.845006
OC3SNGnh.6176_x_at	MIRN101-1	microRNA 101-1	1.60869		OC3P.7402.C2_x_at	VHL			NM_198156.1	von Hippel-Lindau tumor suppressor	0.844531
OC3SNGnh.16061_x_at	MIRN604	microRNA 604			OC3P.5320.C1_s_at	VHL		1.54	NM_198156.1	von Hippel-Lindau tumor suppressor	0.839633
OC3SNGnh.2542_at	MIRN103-1	microRNA 103-1		1.94	OC3P.5320.C1_s_at	VHL		1.54	NM_198156.1	von Hippel-Lindau tumor suppressor	0.837826
OC3SNGnh.127_x_at	C1orf226	microRNA 556			OC3SNGnh.20028_x_at	VHL			NM_198156.1	von Hippel-Lindau tumor suppressor	0.830805
OCADNP.1035_s_at	MIRN659	microRNA 659		-1.54	OC3P.7402.C1_s_at	VHL		-1.79	NM_198156.1	von Hippel-Lindau tumor suppressor	0.829889
OC3SNGnh.10536_at	MIRN101-1	microRNA 101-1		1.63	OCEM.436_x_at	VHL			NM_198156.1	von Hippel-Lindau tumor suppressor	0.82483
OC3SNGnh.10536_at	MIRN101-1	microRNA 101-1		1.63	OC3P.7402.C1_s_at	VHL		-1.79	NM_198156.1	von Hippel-Lindau tumor suppressor	0.819257
OCADNP.15201_s_at	MIRN661	microRNA 661		-1.86	OC3P.7402.C2_x_at	VHL			NM_198156.1	von Hippel-Lindau tumor suppressor	0.817004
OCMXSNG.4688_x_at	MIRN564	microRNA 564			OC3SNGnh.18660_x_at	VHL			NM_198156.1	von Hippel-Lindau tumor suppressor	0.8168
OC3SNGnh.10216_x_at	MIRN548A2	microRNA 548a-2	-1.5706	2.12	OC3SNGn.6983-3a_s_at	VHL			NM_198156.1	von Hippel-Lindau tumor suppressor	0.813827
OC3SNGnh.13214_at	MIRN101-2	microRNA 101-2	1.95404	-1.79	OC3SNGn.6984-474a_x_at	VHL			NM_198156.1	von Hippel-Lindau tumor suppressor	0.808455
OCRS2.3174_at	MIRN661	microRNA 661		1.54	OC3P.5320.C1_s_at	VHL		1.54	NM_198156.1	von Hippel-Lindau tumor suppressor	0.807559
OCRS2.11871_at	MIRN633	microRNA 633		1.61	OC3P.5320.C1_s_at	VHL		1.54	NM_198156.1	von Hippel-Lindau tumor suppressor	0.805156
OC3SNGnh.17094_at	MIRN611	microRNA 611		-1.55	OC3P.5320.C1_s_at	VHL		1.54	NM_198156.1	von Hippel-Lindau tumor suppressor	0.803662
OC3SNGnh.8192_at	MIRN581	microRNA 581		1.53	OC3SNGnh.20028_x_at	VHL			NM_198156.1	von Hippel-Lindau tumor suppressor	0.801075
OCMX.12930.C1_at	MIRN22	microRNA 22		1.66	OC3SNGn.6983-3a_s_at	VHL			NM_198156.1	von Hippel-Lindau tumor suppressor	0.789933
OC3SNGnh.127_x_at	C1orf226	microRNA 556			OC3SNGn.6983-3a_s_at	VHL			NM_198156.1	von Hippel-Lindau tumor suppressor	0.785782
OC3SNGnh.16168_x_at	MIRN576	microRNA 576		-1.54	OC3SNGnh.18660_x_at	VHL			NM_198156.1	von Hippel-Lindau tumor suppressor	0.785554
OCMXSNG.1606_at	MIRN593	microRNA 593			OC3P.5320.C1_s_at	VHL		1.54	NM_198156.1	von Hippel-Lindau tumor suppressor	0.785108
OCMX.6961.C1_at	MIRN30E	microRNA 30e			OC3SNGnh.20028_x_at	VHL			NM_198156.1	von Hippel-Lindau tumor suppressor	0.784433
OC3SNGnh.10536_at	MIRN101-1	microRNA 101-1		1.63	OC3P.5320.C1_s_at	VHL		1.54	NM_198156.1	von Hippel-Lindau tumor suppressor	0.783031
OCADNP.1035_s_at	MIRN659	microRNA 659		-1.54	OC3P.7402.C2_x_at	VHL			NM_198156.1	von Hippel-Lindau tumor suppressor	0.782679
OC3SNGnh.16168_x_at	MIRN576	microRNA 576		-1.54	OC3SNGn.3973-331a_s_at	VHL			NM_198156.1	von Hippel-Lindau tumor suppressor	0.780806
OC3SNGnh.8263_at	MIRN449B	microRNA 449b			OCEM.436_x_at	VHL			NM_198156.1	von Hippel-Lindau tumor suppressor	0.780795
OC3SNGnh.17336_x_at	MIRN559	microRNA 559			OC3SNGn.6984-474a_x_at	VHL			NM_198156.1	von Hippel-Lindau tumor suppressor	0.774226
OCRS2.11871_at	MIRN633	microRNA 633		1.61	OC3SNGnh.20028_x_at	VHL			NM_198156.1	von Hippel-Lindau tumor suppressor	0.774112
OC3SNGnh.17094_at	MIRN611	microRNA 611		-1.55	OC3SNGn.6983-3a_s_at	VHL			NM_198156.1	von Hippel-Lindau tumor suppressor	0.773532
OC3SNGnh.5613_x_at	GPR162	microRNA 200c		2.05	OC3P.7402.C1_s_at	VHL		-1.79	NM_198156.1	von Hippel-Lindau tumor suppressor	0.771344
OCRS2.551_x_at	MIRN129-1	microRNA 129-1			OC3P.7402.C1_s_at	VHL		-1.79	NM_198156.1	von Hippel-Lindau tumor suppressor	0.771083
OC3SNGnh.8370_at	MIRN138-2	microRNA 138-2			OC3P.7402.C2_x_at	VHL			NM_198156.1	von Hippel-Lindau tumor suppressor	0.770931
OC3P.13017.C1_x_at	MIRN181D	microRNA 181d		1.51	OC3P.5320.C1_s_at	VHL		1.54	NM_198156.1	von Hippel-Lindau tumor suppressor	0.769575
OC3SNGnh.8370_at	MIRN138-2	microRNA 138-2			OC3SNGnh.20028_x_at	VHL			NM_198156.1	von Hippel-Lindau tumor suppressor	0.769066
OCRS2.5520_s_at	MIRN659	microRNA 659			OC3P.5320.C1_s_at	VHL		1.54	NM_198156.1	von Hippel-Lindau tumor suppressor	0.767982
OC3SNGnh.6784_at	MIRN33A	microRNA 33a		1.52	OC3SNGn.6983-3a_s_at	VHL			NM_198156.1	von Hippel-Lindau tumor suppressor	0.767664
OC3P.3864.C1_at	MIRN555	microRNA 555		-1.5	OCEM.436_x_at	VHL			NM_198156.1	von Hippel-Lindau tumor suppressor	0.765376
OC3SNGnh.17094_at	MIRN611	microRNA 611		-1.55	OC3SNGnh.20028_x_at	VHL			NM_198156.1	von Hippel-Lindau tumor suppressor	0.760513
OCRS2.551_x_at	MIRN129-1	microRNA 129-1			OC3SNGnh.20028_x_at	VHL			NM_198156.1	von Hippel-Lindau tumor suppressor	0.759641
OC3SNGnh.8370_at	MIRN138-2	microRNA 138-2			OC3SNGn.6984-474a_x_at	VHL			NM_198156.1	von Hippel-Lindau tumor suppressor	0.759503
OC3SNGnh.331_at	MIRN597	microRNA 597			OC3P.5320.C1_s_at	VHL		1.54	NM_198156.1	von Hippel-Lindau tumor suppressor	0.758115
OC3SNGnh.10536_at	MIRN101-1	microRNA 101-1		1.63	OC3SNGn.6983-3a_s_at	VHL			NM_198156.1	von Hippel-Lindau tumor suppressor	0.756999
OC3SNGnh.17053_at	GPR162	microRNA 200c		-1.55	OC3P.5320.C1_s_at	VHL		1.54	NM_198156.1	von Hippel-Lindau tumor suppressor	0.756147
OC3SNGnh.8192_at	MIRN581	microRNA 581		1.53	OC3P.5320.C1_s_at	VHL		1.54	NM_198156.1	von Hippel-Lindau tumor suppressor	0.754555
OCRS2.13103_s_at	MIRN124-3	microRNA 124-3			OC3P.5320.C1_s_at	VHL		1.54	NM_198156.1	von Hippel-Lindau tumor suppressor	0.753126
OC3SNGnh.16713_at	MIRN613	microRNA 613	-2.29079		OC3SNGnh.18660_x_at	VHL			NM_198156.1	von Hippel-Lindau tumor suppressor	0.749859
OC3SNGnh.6784_at	MIRN33A	microRNA 33a		1.52	OC3P.5320.C1_s_at	VHL		1.54	NM_198156.1	von Hippel-Lindau tumor suppressor	0.742972
OCRS2.13103_s_at	MIRN124-3	microRNA 124-3			OC3SNGn.6983-3a_s_at	VHL			NM_198156.1	von Hippel-Lindau tumor suppressor	0.739822
OC3P.3864.C1_at	MIRN555	microRNA 555		-1.5	OC3SNGn.6983-3a_s_at	VHL			NM_198156.1	von Hippel-Lindau tumor suppressor	0.739804
OC3SNGnh.17053_at	GPR162	microRNA 200c		-1.55	OC3SNGn.6984-474a_x_at	VHL			NM_198156.1	von Hippel-Lindau tumor suppressor	0.736147
OCMX.2899.C1_at	MIRN210	microRNA 210		1.76	OC3P.5320.C1_s_at	VHL		1.54	NM_198156.1	von Hippel-Lindau tumor suppressor	0.734611
OC3P.3864.C1_x_at	MIRN555	microRNA 555		1.56	OC3SNGnh.18660_x_at	VHL			NM_198156.1	von Hippel-Lindau tumor suppressor	0.734034
OCUTR.226_x_at	MIRN301B	microRNA 301b		1.55	OC3P.7402.C1_s_at	VHL		-1.79	NM_198156.1	von Hippel-Lindau tumor suppressor	0.727488
OC3P.3864.C1_at	MIRN555	microRNA 555		-1.5	OC3P.5320.C1_s_at	VHL		1.54	NM_198156.1	von Hippel-Lindau tumor suppressor	0.726135
OC3SNGnh.14547_x_at	MIRN345	microRNA 345			OC3SNGnh.20028_x_at	VHL			NM_198156.1	von Hippel-Lindau tumor suppressor	0.724378
OC3SNGnh.14278_at	MIRN339	microRNA 339		1.64	OC3P.7402.C1_s_at	VHL		-1.79	NM_198156.1	von Hippel-Lindau tumor suppressor	0.723155
OCRS2.2867_s_at	MIRN198	microRNA 198		1.6	OC3P.5320.C1_s_at	VHL		1.54	NM_198156.1	von Hippel-Lindau tumor suppressor	0.721388
OCEM.162_at	MIRN592	microRNA 592			OC3SNGnh.20028_x_at	VHL			NM_198156.1	von Hippel-Lindau tumor suppressor	0.721037
OCADNP.13786_s_at	MIRN301B	microRNA 301b	-1.50238		OC3SNGnh.18660_x_at	VHL			NM_198156.1	von Hippel-Lindau tumor suppressor	0.719652
OC3SNGnh.7187_at	MIRN554	microRNA 554		1.76	OC3SNGnh.20028_x_at	VHL			NM_198156.1	von Hippel-Lindau tumor suppressor	0.717766
OC3SNGnh.17094_at	MIRN611	microRNA 611		-1.55	OC3P.7402.C2_x_at	VHL			NM_198156.1	von Hippel-Lindau tumor suppressor	0.715933
OC3SNGnh.14368_at	MIRN614	microRNA 614		-1.76	OC3P.7402.C2_x_at	VHL			NM_198156.1	von Hippel-Lindau tumor suppressor	0.715913
OC3P.13017.C1_x_at	MIRN181D	microRNA 181d		1.51	OC3SNGnh.20028_x_at	VHL			NM_198156.1	von Hippel-Lindau tumor suppressor	0.714873
OC3SNGnh.7186_x_at	MIRN628	microRNA 628		1.55	OC3P.5320.C1_s_at	VHL		1.54	NM_198156.1	von Hippel-Lindau tumor suppressor	0.714573
OC3SNGnh.8370_at	MIRN138-2	microRNA 138-2			OC3P.7402.C1_s_at	VHL		-1.79	NM_198156.1	von Hippel-Lindau tumor suppressor	0.707285
OCADNP.18636_s_at	MIRN572	microRNA 572			OC3P.7402.C1_s_at	VHL		-1.79	NM_198156.1	von Hippel-Lindau tumor suppressor	0.707114
OCADNP.1035_s_at	MIRN659	microRNA 659		-1.54	OC3SNGnh.20028_x_at	VHL			NM_198156.1	von Hippel-Lindau tumor suppressor	0.706224
OC3SNGnh.13214_at	MIRN101-2	microRNA 101-2	1.95404	-1.79	OC3P.7402.C1_s_at	VHL		-1.79	NM_198156.1	von Hippel-Lindau tumor suppressor	0.705556
OC3SNGnh.8192_at	MIRN581	microRNA 581		1.53	OC3SNGn.6983-3a_s_at	VHL			NM_198156.1	von Hippel-Lindau tumor suppressor	0.704982
OCMX.8490.C1_at	MIRN139	microRNA 139		1.55	OC3P.7402.C1_s_at	VHL		-1.79	NM_198156.1	von Hippel-Lindau tumor suppressor	0.70486
OCRS2.3174_at	MIRN661	microRNA 661		1.54	OC3P.7402.C1_s_at	VHL		-1.79	NM_198156.1	von Hippel-Lindau tumor suppressor	0.704833
OC3SNGnh.127_x_at	C1orf226	microRNA 556			OC3P.5320.C1_s_at	VHL		1.54	NM_198156.1	von Hippel-Lindau tumor suppressor	0.703629
OC3SNGnh.13214_at	MIRN101-2	microRNA 101-2	1.95404	-1.79	OC3SNGnh.20028_x_at	VHL			NM_198156.1	von Hippel-Lindau tumor suppressor	0.69879
OCRS2.13103_s_at	MIRN124-3	microRNA 124-3			OC3P.7402.C1_s_at	VHL		-1.79	NM_198156.1	von Hippel-Lindau tumor suppressor	0.697647
OCMX.12930.C1_at	MIRN22	microRNA 22		1.66	OCEM.436_x_at	VHL			NM_198156.1	von Hippel-Lindau tumor suppressor	0.693337
OC3SNGnh.7186_x_at	MIRN628	microRNA 628		1.55	OC3SNGnh.20028_x_at	VHL			NM_198156.1	von Hippel-Lindau tumor suppressor	0.684485
OCMXSNG.1606_at	MIRN593	microRNA 593			OC3P.7402.C1_s_at	VHL		-1.79	NM_198156.1	von Hippel-Lindau tumor suppressor	0.681652
OCMX.6115.C1_x_at	MIRN301A	microRNA 301a		-1.6	OC3SNGn.3973-331a_s_at	VHL			NM_198156.1	von Hippel-Lindau tumor suppressor	0.676626
OC3P.3864.C1_at	MIRN555	microRNA 555		-1.5	OC3P.7402.C2_x_at	VHL			NM_198156.1	von Hippel-Lindau tumor suppressor	0.67447
OC3SNGnh.17053_at	GPR162	microRNA 200c		-1.55	OC3P.7402.C2_x_at	VHL			NM_198156.1	von Hippel-Lindau tumor suppressor	0.67102
OC3SNGnh.5421_at	MIRN561	microRNA 561	-2.17845		OC3SNGnh.18660_x_at	VHL			NM_198156.1	von Hippel-Lindau tumor suppressor	0.670286
OC3SNGnh.13689_x_at	MIRN642	microRNA 642	-1.55694		OC3SNGnh.18660_x_at	VHL			NM_198156.1	von Hippel-Lindau tumor suppressor	0.669217
OCRS2.3174_at	MIRN661	microRNA 661		1.54	OC3SNGn.6983-3a_s_at	VHL			NM_198156.1	von Hippel-Lindau tumor suppressor	0.663537
OC3SNGnh.8370_at	MIRN138-2	microRNA 138-2			OC3SNGnh.18660_x_at	VHL			NM_198156.1	von Hippel-Lindau tumor suppressor	0.660635
OCMX.6961.C1_at	MIRN30E	microRNA 30e			OC3SNGn.6983-3a_s_at	VHL			NM_198156.1	von Hippel-Lindau tumor suppressor	0.659184
OCMXSNG.4409_at	MIRN7-1	microRNA 7-1		1.78	OC3P.5320.C1_s_at	VHL		1.54	NM_198156.1	von Hippel-Lindau tumor suppressor	0.658872
OCMX.8490.C1_at	MIRN139	microRNA 139		1.55	OC3SNGnh.20028_x_at	VHL			NM_198156.1	von Hippel-Lindau tumor suppressor	0.657726
OC3SNGnh.14278_at	MIRN339	microRNA 339		1.64	OC3SNGnh.20028_x_at	VHL			NM_198156.1	von Hippel-Lindau tumor suppressor	0.655999
OC3SNGnh.14547_x_at	MIRN345	microRNA 345			OC3P.5320.C1_s_at	VHL		1.54	NM_198156.1	von Hippel-Lindau tumor suppressor	0.655479
OC3SNGnh.7187_at	MIRN554	microRNA 554		1.76	OC3P.7402.C2_x_at	VHL			NM_198156.1	von Hippel-Lindau tumor suppressor	0.653328
OCADNP.1035_s_at	MIRN659	microRNA 659		-1.54	OC3SNGnh.18660_x_at	VHL			NM_198156.1	von Hippel-Lindau tumor suppressor	0.653216
OC3P.3864.C1_x_at	MIRN555	microRNA 555		1.56	OC3SNGnh.20028_x_at	VHL			NM_198156.1	von Hippel-Lindau tumor suppressor	0.652222
OC3SNGnh.17053_at	GPR162	microRNA 200c		-1.55	OC3SNGnh.20028_x_at	VHL			NM_198156.1	von Hippel-Lindau tumor suppressor	0.648182
OCADNP.15201_s_at	MIRN661	microRNA 661		-1.86	OC3SNGnh.20028_x_at	VHL			NM_198156.1	von Hippel-Lindau tumor suppressor	0.642387
OCRS2.5520_s_at	MIRN659	microRNA 659			OC3SNGnh.20028_x_at	VHL			NM_198156.1	von Hippel-Lindau tumor suppressor	0.63892
OCADNP.18636_s_at	MIRN572	microRNA 572			OCEM.436_x_at	VHL			NM_198156.1	von Hippel-Lindau tumor suppressor	0.63734
OC3P.11403.C1_s_at	GPR162	microRNA 200c	-1.8663	-1.63	OC3SNGn.3973-331a_s_at	VHL			NM_198156.1	von Hippel-Lindau tumor suppressor	0.633368
OC3SNGnh.14368_at	MIRN614	microRNA 614		-1.76	OCEM.436_x_at	VHL			NM_198156.1	von Hippel-Lindau tumor suppressor	0.633217
OCMX.12017.C1_at	MIRN146B	microRNA 146b			OC3SNGnh.20028_x_at	VHL			NM_198156.1	von Hippel-Lindau tumor suppressor	0.628083
OCEM.162_at	MIRN592	microRNA 592			OC3SNGn.6983-3a_s_at	VHL			NM_198156.1	von Hippel-Lindau tumor suppressor	0.623571
OCEM.162_at	MIRN592	microRNA 592			OC3SNGnh.18660_x_at	VHL			NM_198156.1	von Hippel-Lindau tumor suppressor	0.623545
OCADNP.1035_s_at	MIRN659	microRNA 659		-1.54	OC3SNGn.6984-474a_x_at	VHL			NM_198156.1	von Hippel-Lindau tumor suppressor	0.621188
OC3SNGnh.16061_x_at	MIRN604	microRNA 604			OC3P.7402.C1_s_at	VHL		-1.79	NM_198156.1	von Hippel-Lindau tumor suppressor	0.620479
OCADNP.18636_s_at	MIRN572	microRNA 572			OC3P.7402.C2_x_at	VHL			NM_198156.1	von Hippel-Lindau tumor suppressor	0.619805
OC3SNGnh.127_x_at	C1orf226	microRNA 556			OC3P.7402.C1_s_at	VHL		-1.79	NM_198156.1	von Hippel-Lindau tumor suppressor	0.618184
OC3SNGnh.2542_at	MIRN103-1	microRNA 103-1		1.94	OC3P.7402.C1_s_at	VHL		-1.79	NM_198156.1	von Hippel-Lindau tumor suppressor	0.617495
OCMX.6961.C1_at	MIRN30E	microRNA 30e			OC3P.5320.C1_s_at	VHL		1.54	NM_198156.1	von Hippel-Lindau tumor suppressor	0.616954
OCMXSNG.4688_x_at	MIRN564	microRNA 564			OC3P.5320.C1_s_at	VHL		1.54	NM_198156.1	von Hippel-Lindau tumor suppressor	0.615534
OCRS2.551_x_at	MIRN129-1	microRNA 129-1			OC3SNGn.6983-3a_s_at	VHL			NM_198156.1	von Hippel-Lindau tumor suppressor	0.615443
OCMXSNG.4688_x_at	MIRN564	microRNA 564			OC3P.7402.C1_s_at	VHL		-1.79	NM_198156.1	von Hippel-Lindau tumor suppressor	0.614304
OC3SNGnh.8192_at	MIRN581	microRNA 581		1.53	OC3P.7402.C1_s_at	VHL		-1.79	NM_198156.1	von Hippel-Lindau tumor suppressor	0.612694
OC3SNGnh.6176_x_at	MIRN101-1	microRNA 101-1	1.60869		OC3P.7402.C1_s_at	VHL		-1.79	NM_198156.1	von Hippel-Lindau tumor suppressor	0.606581
OC3SNGnh.14278_at	MIRN339	microRNA 339		1.64	OCEM.436_x_at	VHL			NM_198156.1	von Hippel-Lindau tumor suppressor	0.603123
OCEM.162_at	MIRN592	microRNA 592			OC3P.5320.C1_s_at	VHL		1.54	NM_198156.1	von Hippel-Lindau tumor suppressor	0.600356
OC3SNGnh.8263_at	MIRN449B	microRNA 449b			OC3P.7402.C1_s_at	VHL		-1.79	NM_198156.1	von Hippel-Lindau tumor suppressor	0.599435
OC3SNGnh.6784_at	MIRN33A	microRNA 33a		1.52	OC3P.7402.C1_s_at	VHL		-1.79	NM_198156.1	von Hippel-Lindau tumor suppressor	0.596025
OC3SNGnh.13337_x_at	MIRN7-3	microRNA 7-3	2.10284		OCEM.436_x_at	VHL			NM_198156.1	von Hippel-Lindau tumor suppressor	0.595028
OCMX.2899.C1_at	MIRN210	microRNA 210		1.76	OCEM.436_x_at	VHL			NM_198156.1	von Hippel-Lindau tumor suppressor	0.591462
OCRS2.3174_at	MIRN661	microRNA 661		1.54	OC3SNGnh.20028_x_at	VHL			NM_198156.1	von Hippel-Lindau tumor suppressor	0.586733
OCEM.162_at	MIRN592	microRNA 592			OC3SNGn.6984-474a_x_at	VHL			NM_198156.1	von Hippel-Lindau tumor suppressor	0.586358
OC3SNGnh.5613_x_at	GPR162	microRNA 200c		2.05	OC3SNGnh.20028_x_at	VHL			NM_198156.1	von Hippel-Lindau tumor suppressor	0.585288
OC3SNGnh.127_x_at	C1orf226	microRNA 556			OCEM.436_x_at	VHL			NM_198156.1	von Hippel-Lindau tumor suppressor	0.582986
OC3SNGnh.13214_at	MIRN101-2	microRNA 101-2	1.95404	-1.79	OC3P.5320.C1_s_at	VHL		1.54	NM_198156.1	von Hippel-Lindau tumor suppressor	0.581124
OC3SNGnh.16592_x_at	MIRN425	microRNA 425			OC3SNGnh.18660_x_at	VHL			NM_198156.1	von Hippel-Lindau tumor suppressor	0.579694
OC3SNGnh.6176_x_at	MIRN101-1	microRNA 101-1	1.60869		OC3SNGn.6984-474a_x_at	VHL			NM_198156.1	von Hippel-Lindau tumor suppressor	0.57925
OCMX.2899.C1_at	MIRN210	microRNA 210		1.76	OC3P.7402.C1_s_at	VHL		-1.79	NM_198156.1	von Hippel-Lindau tumor suppressor	0.579018
OC3SNGnh.2220_at	MIRN149	microRNA 149		1.75	OC3P.5320.C1_s_at	VHL		1.54	NM_198156.1	von Hippel-Lindau tumor suppressor	0.578959
OC3SNGnh.2107_x_at	MIRN552	microRNA 552	-1.61406		OC3SNGnh.18660_x_at	VHL			NM_198156.1	von Hippel-Lindau tumor suppressor	0.575653
OC3SNGnh.11550_at	MIRN29C	microRNA 29c		1.55	OC3SNGnh.18660_x_at	VHL			NM_198156.1	von Hippel-Lindau tumor suppressor	0.575255
OC3SNGnh.12857_x_at	MIRN600	microRNA 600			OC3SNGnh.18660_x_at	VHL			NM_198156.1	von Hippel-Lindau tumor suppressor	0.573695
OC3SNGnh.7186_x_at	MIRN628	microRNA 628		1.55	OC3SNGn.6984-474a_x_at	VHL			NM_198156.1	von Hippel-Lindau tumor suppressor	0.57317
OCMX.2904.C1_x_at	MIRN548C	microRNA 548c			OCEM.436_x_at	VHL			NM_198156.1	von Hippel-Lindau tumor suppressor	0.572833
OC3SNGnh.4055_at	MIRN103-2	microRNA 103-2		2.04	OC3SNGn.6983-3a_s_at	VHL			NM_198156.1	von Hippel-Lindau tumor suppressor	0.570502
OCEM.162_at	MIRN592	microRNA 592			OC3P.7402.C2_x_at	VHL			NM_198156.1	von Hippel-Lindau tumor suppressor	0.570094
OCUTR.226_x_at	MIRN301B	microRNA 301b		1.55	OC3SNGnh.20028_x_at	VHL			NM_198156.1	von Hippel-Lindau tumor suppressor	0.569829
OC3P.3864.C1_x_at	MIRN555	microRNA 555		1.56	OC3P.5320.C1_s_at	VHL		1.54	NM_198156.1	von Hippel-Lindau tumor suppressor	0.569788
OCRS2.13103_s_at	MIRN124-3	microRNA 124-3			OCEM.436_x_at	VHL			NM_198156.1	von Hippel-Lindau tumor suppressor	0.568984
OC3SNGnh.17336_x_at	MIRN559	microRNA 559			OC3P.7402.C2_x_at	VHL			NM_198156.1	von Hippel-Lindau tumor suppressor	0.567621
OCRS2.11871_at	MIRN633	microRNA 633		1.61	OC3SNGn.6984-474a_x_at	VHL			NM_198156.1	von Hippel-Lindau tumor suppressor	0.562595
OCMX.8490.C1_at	MIRN139	microRNA 139		1.55	OCEM.436_x_at	VHL			NM_198156.1	von Hippel-Lindau tumor suppressor	0.562441
OCMX.8490.C1_at	MIRN139	microRNA 139		1.55	OC3SNGn.6983-3a_s_at	VHL			NM_198156.1	von Hippel-Lindau tumor suppressor	0.560759
OC3SNGnh.2542_at	MIRN103-1	microRNA 103-1		1.94	OC3SNGnh.18660_x_at	VHL			NM_198156.1	von Hippel-Lindau tumor suppressor	0.559374
OC3SNGnh.6784_at	MIRN33A	microRNA 33a		1.52	OC3SNGn.6984-474a_x_at	VHL			NM_198156.1	von Hippel-Lindau tumor suppressor	0.558274
OCMX.2899.C1_at	MIRN210	microRNA 210		1.76	OC3SNGn.6983-3a_s_at	VHL			NM_198156.1	von Hippel-Lindau tumor suppressor	0.557123
OC3SNGnh.4055_at	MIRN103-2	microRNA 103-2		2.04	OC3P.5320.C1_s_at	VHL		1.54	NM_198156.1	von Hippel-Lindau tumor suppressor	0.556643
OCMXSNG.4409_at	MIRN7-1	microRNA 7-1		1.78	OC3SNGnh.20028_x_at	VHL			NM_198156.1	von Hippel-Lindau tumor suppressor	0.55623
OCADNP.13786_s_at	MIRN301B	microRNA 301b	-1.50238		OC3SNGn.3973-331a_s_at	VHL			NM_198156.1	von Hippel-Lindau tumor suppressor	0.553647
OC3SNGnh.4795_x_at	MIRN573	microRNA 573			OC3SNGnh.20028_x_at	VHL			NM_198156.1	von Hippel-Lindau tumor suppressor	0.551913
OCEM.162_at	MIRN592	microRNA 592			OC3P.7402.C1_s_at	VHL		-1.79	NM_198156.1	von Hippel-Lindau tumor suppressor	0.551144
OCRS2.5520_s_at	MIRN659	microRNA 659			OC3P.7402.C1_s_at	VHL		-1.79	NM_198156.1	von Hippel-Lindau tumor suppressor	0.55009
OC3SNGnh.12857_x_at	MIRN600	microRNA 600			OC3P.5320.C1_s_at	VHL		1.54	NM_198156.1	von Hippel-Lindau tumor suppressor	0.549228
OCRS2.551_x_at	MIRN129-1	microRNA 129-1			OCEM.436_x_at	VHL			NM_198156.1	von Hippel-Lindau tumor suppressor	0.548832
OCRS2.5576_x_at	MIRN324	microRNA 324			OC3P.5320.C1_s_at	VHL		1.54	NM_198156.1	von Hippel-Lindau tumor suppressor	0.547358
OC3SNGnh.8192_at	MIRN581	microRNA 581		1.53	OCEM.436_x_at	VHL			NM_198156.1	von Hippel-Lindau tumor suppressor	0.543495
OCRS2.13103_s_at	MIRN124-3	microRNA 124-3			OC3SNGnh.20028_x_at	VHL			NM_198156.1	von Hippel-Lindau tumor suppressor	0.543032
OC3SNGnh.17094_at	MIRN611	microRNA 611		-1.55	OC3SNGn.6984-474a_x_at	VHL			NM_198156.1	von Hippel-Lindau tumor suppressor	0.540171
OCMX.12930.C1_at	MIRN22	microRNA 22		1.66	OC3P.5320.C1_s_at	VHL		1.54	NM_198156.1	von Hippel-Lindau tumor suppressor	0.540141
OC3SNGnh.17094_at	MIRN611	microRNA 611		-1.55	OCEM.436_x_at	VHL			NM_198156.1	von Hippel-Lindau tumor suppressor	0.53705
OC3P.3864.C1_at	MIRN555	microRNA 555		-1.5	OC3SNGnh.20028_x_at	VHL			NM_198156.1	von Hippel-Lindau tumor suppressor	0.531002
OC3SNGnh.17053_at	GPR162	microRNA 200c		-1.55	OC3P.7402.C1_s_at	VHL		-1.79	NM_198156.1	von Hippel-Lindau tumor suppressor	0.529521
OC3SNGnh.13337_x_at	MIRN7-3	microRNA 7-3	2.10284		OC3SNGnh.20028_x_at	VHL			NM_198156.1	von Hippel-Lindau tumor suppressor	0.528127
OCMX.2899.C1_at	MIRN210	microRNA 210		1.76	OC3SNGnh.20028_x_at	VHL			NM_198156.1	von Hippel-Lindau tumor suppressor	0.527987
OCMXSNG.4688_x_at	MIRN564	microRNA 564			OC3P.7402.C2_x_at	VHL			NM_198156.1	von Hippel-Lindau tumor suppressor	0.527344
OC3SNGnh.127_x_at	C1orf226	microRNA 556			OC3SNGn.6984-474a_x_at	VHL			NM_198156.1	von Hippel-Lindau tumor suppressor	0.525411
OCADNP.18636_s_at	MIRN572	microRNA 572			OC3SNGn.6983-3a_s_at	VHL			NM_198156.1	von Hippel-Lindau tumor suppressor	0.525146
OC3SNGnh.10536_at	MIRN101-1	microRNA 101-1		1.63	OC3SNGnh.20028_x_at	VHL			NM_198156.1	von Hippel-Lindau tumor suppressor	0.525028
OCADNP.15201_s_at	MIRN661	microRNA 661		-1.86	OC3SNGn.6984-474a_x_at	VHL			NM_198156.1	von Hippel-Lindau tumor suppressor	0.520719
OC3SNGnh.7187_at	MIRN554	microRNA 554		1.76	OC3SNGn.6984-474a_x_at	VHL			NM_198156.1	von Hippel-Lindau tumor suppressor	0.520292
OC3P.2409.C1_s_at	MIRN21	microRNA 21		1.86	OC3P.5320.C1_s_at	VHL		1.54	NM_198156.1	von Hippel-Lindau tumor suppressor	0.518332
OCMX.2904.C1_x_at	MIRN548C	microRNA 548c			OC3P.5320.C1_s_at	VHL		1.54	NM_198156.1	von Hippel-Lindau tumor suppressor	0.517695
OC3SNGnh.14278_at	MIRN339	microRNA 339		1.64	OC3SNGn.6983-3a_s_at	VHL			NM_198156.1	von Hippel-Lindau tumor suppressor	0.514158
OCMXSNG.1606_at	MIRN593	microRNA 593			OC3SNGnh.18660_x_at	VHL			NM_198156.1	von Hippel-Lindau tumor suppressor	0.514003
OC3SNGnh.17336_x_at	MIRN559	microRNA 559			OC3SNGnh.20028_x_at	VHL			NM_198156.1	von Hippel-Lindau tumor suppressor	0.513737
OC3SNGnh.15682_x_at	MIRN199B	microRNA 199b	1.96522		OC3SNGnh.20028_x_at	VHL			NM_198156.1	von Hippel-Lindau tumor suppressor	0.512554
OC3SNGnh.16713_at	MIRN613	microRNA 613	-2.29079		OC3SNGn.3973-331a_s_at	VHL			NM_198156.1	von Hippel-Lindau tumor suppressor	0.510773
OC3SNGnh.15682_x_at	MIRN199B	microRNA 199b	1.96522		OC3SNGn.6984-474a_x_at	VHL			NM_198156.1	von Hippel-Lindau tumor suppressor	0.510756
OC3SNGnh.4055_at	MIRN103-2	microRNA 103-2		2.04	OC3SNGnh.20028_x_at	VHL			NM_198156.1	von Hippel-Lindau tumor suppressor	0.50931
OCRS2.11871_at	MIRN633	microRNA 633		1.61	OC3P.7402.C1_s_at	VHL		-1.79	NM_198156.1	von Hippel-Lindau tumor suppressor	0.508708
OCRS2.551_x_at	MIRN129-1	microRNA 129-1			OC3P.7402.C2_x_at	VHL			NM_198156.1	von Hippel-Lindau tumor suppressor	0.507549
OCRS2.3174_at	MIRN661	microRNA 661		1.54	OCEM.436_x_at	VHL			NM_198156.1	von Hippel-Lindau tumor suppressor	0.500387
OC3SNGnh.14117_at	MIRN557	microRNA 557			OC3SNGnh.20028_x_at	VHL			NM_198156.1	von Hippel-Lindau tumor suppressor	0.499183
OCMX.6961.C1_at	MIRN30E	microRNA 30e			OC3SNGn.6984-474a_x_at	VHL			NM_198156.1	von Hippel-Lindau tumor suppressor	0.498893
OC3SNGnh.11550_at	MIRN29C	microRNA 29c		1.55	OC3P.5320.C1_s_at	VHL		1.54	NM_198156.1	von Hippel-Lindau tumor suppressor	0.496927
OC3P.3864.C1_x_at	MIRN555	microRNA 555		1.56	OC3SNGn.6984-474a_x_at	VHL			NM_198156.1	von Hippel-Lindau tumor suppressor	0.494154
OCADNP.15201_s_at	MIRN661	microRNA 661		-1.86	OCEM.436_x_at	VHL			NM_198156.1	von Hippel-Lindau tumor suppressor	0.48966
OCUTR.226_x_at	MIRN301B	microRNA 301b		1.55	OCEM.436_x_at	VHL			NM_198156.1	von Hippel-Lindau tumor suppressor	0.489184
OC3SNGnh.16061_x_at	MIRN604	microRNA 604			OC3SNGnh.20028_x_at	VHL			NM_198156.1	von Hippel-Lindau tumor suppressor	0.487654
OC3SNGnh.14547_x_at	MIRN345	microRNA 345			OC3SNGn.6983-3a_s_at	VHL			NM_198156.1	von Hippel-Lindau tumor suppressor	0.485113
OCRS2.5576_x_at	MIRN324	microRNA 324			OC3SNGnh.20028_x_at	VHL			NM_198156.1	von Hippel-Lindau tumor suppressor	0.483532
OC3SNGnh.331_at	MIRN597	microRNA 597			OC3P.7402.C1_s_at	VHL		-1.79	NM_198156.1	von Hippel-Lindau tumor suppressor	0.482693
OCMX.12930.C1_at	MIRN22	microRNA 22		1.66	OC3SNGnh.20028_x_at	VHL			NM_198156.1	von Hippel-Lindau tumor suppressor	0.481961
OCMX.6961.C1_at	MIRN30E	microRNA 30e			OCEM.436_x_at	VHL			NM_198156.1	von Hippel-Lindau tumor suppressor	0.481868
OC3SNGnh.5613_x_at	GPR162	microRNA 200c		2.05	OC3P.7402.C2_x_at	VHL			NM_198156.1	von Hippel-Lindau tumor suppressor	0.479245
OC3SNGnh.5613_x_at	GPR162	microRNA 200c		2.05	OCEM.436_x_at	VHL			NM_198156.1	von Hippel-Lindau tumor suppressor	0.477273
OCADNP.15201_s_at	MIRN661	microRNA 661		-1.86	OC3SNGn.6983-3a_s_at	VHL			NM_198156.1	von Hippel-Lindau tumor suppressor	0.477103
OCMX.12930.C1_at	MIRN22	microRNA 22		1.66	OC3P.7402.C1_s_at	VHL		-1.79	NM_198156.1	von Hippel-Lindau tumor suppressor	0.476861
OC3SNGnh.8192_at	MIRN581	microRNA 581		1.53	OC3SNGn.6984-474a_x_at	VHL			NM_198156.1	von Hippel-Lindau tumor suppressor	0.475917
OCMX.12017.C1_at	MIRN146B	microRNA 146b			OC3SNGn.6983-3a_s_at	VHL			NM_198156.1	von Hippel-Lindau tumor suppressor	0.473803
OCMX.6961.C1_at	MIRN30E	microRNA 30e			OC3P.7402.C1_s_at	VHL		-1.79	NM_198156.1	von Hippel-Lindau tumor suppressor	0.471516
OC3SNGnh.8263_at	MIRN449B	microRNA 449b			OC3SNGnh.20028_x_at	VHL			NM_198156.1	von Hippel-Lindau tumor suppressor	0.469826
OC3P.13017.C1_x_at	MIRN181D	microRNA 181d		1.51	OC3P.7402.C1_s_at	VHL		-1.79	NM_198156.1	von Hippel-Lindau tumor suppressor	0.469638
OCRS2.5520_s_at	MIRN659	microRNA 659			OC3SNGn.6983-3a_s_at	VHL			NM_198156.1	von Hippel-Lindau tumor suppressor	0.468551
OC3SNGnh.127_x_at	C1orf226	microRNA 556			OC3P.7402.C2_x_at	VHL			NM_198156.1	von Hippel-Lindau tumor suppressor	0.46396
OC3SNGnh.6784_at	MIRN33A	microRNA 33a		1.52	OC3P.7402.C2_x_at	VHL			NM_198156.1	von Hippel-Lindau tumor suppressor	0.463077
OCRS2.2867_s_at	MIRN198	microRNA 198		1.6	OC3P.7402.C1_s_at	VHL		-1.79	NM_198156.1	von Hippel-Lindau tumor suppressor	0.461837
OC3SNGnh.8263_at	MIRN449B	microRNA 449b			OC3P.7402.C2_x_at	VHL			NM_198156.1	von Hippel-Lindau tumor suppressor	0.461485
OC3SNGnh.17053_at	GPR162	microRNA 200c		-1.55	OC3SNGnh.18660_x_at	VHL			NM_198156.1	von Hippel-Lindau tumor suppressor	0.458078
OC3P.13017.C1_x_at	MIRN181D	microRNA 181d		1.51	OC3SNGn.6984-474a_x_at	VHL			NM_198156.1	von Hippel-Lindau tumor suppressor	0.45523
OC3SNGnh.696_at	MIRN569	microRNA 569		1.92	OC3SNGn.6983-3a_s_at	VHL			NM_198156.1	von Hippel-Lindau tumor suppressor	0.455197
OCRS2.5520_s_at	MIRN659	microRNA 659			OCEM.436_x_at	VHL			NM_198156.1	von Hippel-Lindau tumor suppressor	0.45504
OCADNP.18636_s_at	MIRN572	microRNA 572			OCEM.436_at	VHL			NM_198156.1	von Hippel-Lindau tumor suppressor	0.45047
OCADNP.15201_s_at	MIRN661	microRNA 661		-1.86	OC3SNGnh.18660_x_at	VHL			NM_198156.1	von Hippel-Lindau tumor suppressor	0.449367
OC3SNGnh.2542_at	MIRN103-1	microRNA 103-1		1.94	OC3SNGnh.20028_x_at	VHL			NM_198156.1	von Hippel-Lindau tumor suppressor	0.448197
OC3SNGnh.13337_x_at	MIRN7-3	microRNA 7-3	2.10284		OC3SNGn.6983-3a_s_at	VHL			NM_198156.1	von Hippel-Lindau tumor suppressor	0.44743
OCRS2.551_x_at	MIRN129-1	microRNA 129-1			OC3SNGn.6984-474a_x_at	VHL			NM_198156.1	von Hippel-Lindau tumor suppressor	0.446773
OC3SNGnh.12857_x_at	MIRN600	microRNA 600			OC3SNGnh.20028_x_at	VHL			NM_198156.1	von Hippel-Lindau tumor suppressor	0.442709
OC3SNGnh.4795_x_at	MIRN573	microRNA 573			OC3SNGn.6984-474a_x_at	VHL			NM_198156.1	von Hippel-Lindau tumor suppressor	0.436304
OC3SNGnh.696_at	MIRN569	microRNA 569		1.92	OC3SNGnh.20028_x_at	VHL			NM_198156.1	von Hippel-Lindau tumor suppressor	0.434232
OC3SNGnh.7187_at	MIRN554	microRNA 554		1.76	OC3SNGnh.18660_x_at	VHL			NM_198156.1	von Hippel-Lindau tumor suppressor	0.433631
OC3SNGnh.7186_x_at	MIRN628	microRNA 628		1.55	OC3SNGnh.18660_x_at	VHL			NM_198156.1	von Hippel-Lindau tumor suppressor	0.432605
OC3P.13017.C1_x_at	MIRN181D	microRNA 181d		1.51	OC3SNGnh.18660_x_at	VHL			NM_198156.1	von Hippel-Lindau tumor suppressor	0.430078
OC3SNGnh.12857_x_at	MIRN600	microRNA 600			OC3SNGn.6984-474a_x_at	VHL			NM_198156.1	von Hippel-Lindau tumor suppressor	0.428907
OC3SNGnh.331_at	MIRN597	microRNA 597			OC3SNGnh.20028_x_at	VHL			NM_198156.1	von Hippel-Lindau tumor suppressor	0.428333
OC3SNGnh.10536_at	MIRN101-1	microRNA 101-1		1.63	OC3P.7402.C2_x_at	VHL			NM_198156.1	von Hippel-Lindau tumor suppressor	0.426872
OC3SNGnh.6176_x_at	MIRN101-1	microRNA 101-1	1.60869		OC3P.5320.C1_s_at	VHL		1.54	NM_198156.1	von Hippel-Lindau tumor suppressor	0.423419
OC3SNGnh.14547_x_at	MIRN345	microRNA 345			OC3SNGn.6984-474a_x_at	VHL			NM_198156.1	von Hippel-Lindau tumor suppressor	0.422655
OC3SNGnh.4795_x_at	MIRN573	microRNA 573			OC3P.5320.C1_s_at	VHL		1.54	NM_198156.1	von Hippel-Lindau tumor suppressor	0.421785
OCMX.12017.C1_at	MIRN146B	microRNA 146b			OC3SNGn.6984-474a_x_at	VHL			NM_198156.1	von Hippel-Lindau tumor suppressor	0.421264
OCMX.6115.C1_x_at	MIRN301A	microRNA 301a		-1.6	OC3SNGnh.18660_x_at	VHL			NM_198156.1	von Hippel-Lindau tumor suppressor	0.418936
OC3SNGnh.7187_at	MIRN554	microRNA 554		1.76	OCEM.436_x_at	VHL			NM_198156.1	von Hippel-Lindau tumor suppressor	0.418486
OC3SNGnh.14278_at	MIRN339	microRNA 339		1.64	OC3P.7402.C2_x_at	VHL			NM_198156.1	von Hippel-Lindau tumor suppressor	0.41695
OC3SNGnh.696_at	MIRN569	microRNA 569		1.92	OC3P.5320.C1_s_at	VHL		1.54	NM_198156.1	von Hippel-Lindau tumor suppressor	0.416656
OCMXSNG.1606_at	MIRN593	microRNA 593			OCEM.436_x_at	VHL			NM_198156.1	von Hippel-Lindau tumor suppressor	0.416237
OC3P.12763.C1_x_at	MIRN151	microRNA 151		1.74	OC3P.5320.C1_s_at	VHL		1.54	NM_198156.1	von Hippel-Lindau tumor suppressor	0.409948
OC3SNGnh.8192_at	MIRN581	microRNA 581		1.53	OC3P.7402.C2_x_at	VHL			NM_198156.1	von Hippel-Lindau tumor suppressor	0.407977
OC3SNGnh.16592_x_at	MIRN425	microRNA 425			OC3P.5320.C1_s_at	VHL		1.54	NM_198156.1	von Hippel-Lindau tumor suppressor	0.405974
OCUTR.226_x_at	MIRN301B	microRNA 301b		1.55	OC3SNGn.6983-3a_s_at	VHL			NM_198156.1	von Hippel-Lindau tumor suppressor	0.404733
OC3SNGnh.331_at	MIRN597	microRNA 597			OC3SNGnh.18660_x_at	VHL			NM_198156.1	von Hippel-Lindau tumor suppressor	0.402622
OC3SNGnh.13337_x_at	MIRN7-3	microRNA 7-3	2.10284		OC3P.5320.C1_s_at	VHL		1.54	NM_198156.1	von Hippel-Lindau tumor suppressor	0.399317
OC3P.12763.C1_at	MIRN151	microRNA 151			OC3P.5320.C1_s_at	VHL		1.54	NM_198156.1	von Hippel-Lindau tumor suppressor	0.396978
OCRS2.11871_at	MIRN633	microRNA 633		1.61	OC3P.7402.C2_x_at	VHL			NM_198156.1	von Hippel-Lindau tumor suppressor	0.396311
OC3SNGnh.15682_x_at	MIRN199B	microRNA 199b	1.96522		OC3P.5320.C1_s_at	VHL		1.54	NM_198156.1	von Hippel-Lindau tumor suppressor	0.395827
OCMX.6115.C1_x_at	MIRN301A	microRNA 301a		-1.6	OCEM.436_at	VHL			NM_198156.1	von Hippel-Lindau tumor suppressor	0.395706
OCUTR.226_x_at	MIRN301B	microRNA 301b		1.55	OC3P.7402.C2_x_at	VHL			NM_198156.1	von Hippel-Lindau tumor suppressor	0.392178
OC3SNGnh.14368_at	MIRN614	microRNA 614		-1.76	OC3SNGnh.20028_x_at	VHL			NM_198156.1	von Hippel-Lindau tumor suppressor	0.389608
OCRS2.2867_s_at	MIRN198	microRNA 198		1.6	OC3SNGnh.18660_x_at	VHL			NM_198156.1	von Hippel-Lindau tumor suppressor	0.388659
OC3P.12763.C1_at	MIRN151	microRNA 151			OC3SNGnh.18660_x_at	VHL			NM_198156.1	von Hippel-Lindau tumor suppressor	0.388377
OC3SNGnh.16061_x_at	MIRN604	microRNA 604			OC3SNGnh.18660_x_at	VHL			NM_198156.1	von Hippel-Lindau tumor suppressor	0.388103
OC3SNGnh.14831_at	MIRN582	microRNA 582		2.31	OCEM.436_x_at	VHL			NM_198156.1	von Hippel-Lindau tumor suppressor	0.38781
OCADNP.18636_s_at	MIRN572	microRNA 572			OC3P.5320.C1_s_at	VHL		1.54	NM_198156.1	von Hippel-Lindau tumor suppressor	0.387194
OC3P.12763.C1_x_at	MIRN151	microRNA 151		1.74	OC3SNGnh.18660_x_at	VHL			NM_198156.1	von Hippel-Lindau tumor suppressor	0.386193
OC3SNGnh.14117_at	MIRN557	microRNA 557			OC3SNGn.6984-474a_x_at	VHL			NM_198156.1	von Hippel-Lindau tumor suppressor	0.38466
OCRS2.3174_at	MIRN661	microRNA 661		1.54	OC3SNGnh.18660_x_at	VHL			NM_198156.1	von Hippel-Lindau tumor suppressor	0.383727
OCMX.2904.C1_x_at	MIRN548C	microRNA 548c			OC3SNGnh.20028_x_at	VHL			NM_198156.1	von Hippel-Lindau tumor suppressor	0.383192
OC3P.2409.C1_s_at	MIRN21	microRNA 21		1.86	OC3SNGnh.20028_x_at	VHL			NM_198156.1	von Hippel-Lindau tumor suppressor	0.382625
OCMX.8490.C1_at	MIRN139	microRNA 139		1.55	OC3P.7402.C2_x_at	VHL			NM_198156.1	von Hippel-Lindau tumor suppressor	0.379925
OC3SNGnh.7187_at	MIRN554	microRNA 554		1.76	OC3SNGn.6983-3a_s_at	VHL			NM_198156.1	von Hippel-Lindau tumor suppressor	0.374616
OC3SNGnh.130_s_at	MIRN93	microRNA 93		1.64	OC3SNGnh.20028_x_at	VHL			NM_198156.1	von Hippel-Lindau tumor suppressor	0.372927
OC3SNGnh.13337_x_at	MIRN7-3	microRNA 7-3	2.10284		OC3P.7402.C1_s_at	VHL		-1.79	NM_198156.1	von Hippel-Lindau tumor suppressor	0.372857
OC3SNGnh.7186_x_at	MIRN628	microRNA 628		1.55	OC3P.7402.C1_s_at	VHL		-1.79	NM_198156.1	von Hippel-Lindau tumor suppressor	0.37154
OC3P.13017.C1_x_at	MIRN181D	microRNA 181d		1.51	OC3SNGn.6983-3a_s_at	VHL			NM_198156.1	von Hippel-Lindau tumor suppressor	0.371387
OCMX.2904.C1_x_at	MIRN548C	microRNA 548c			OC3P.7402.C1_s_at	VHL		-1.79	NM_198156.1	von Hippel-Lindau tumor suppressor	0.370531
OC3SNGnh.8263_at	MIRN449B	microRNA 449b			OC3P.5320.C1_s_at	VHL		1.54	NM_198156.1	von Hippel-Lindau tumor suppressor	0.368076
OC3SNGnh.14547_x_at	MIRN345	microRNA 345			OC3P.7402.C1_s_at	VHL		-1.79	NM_198156.1	von Hippel-Lindau tumor suppressor	0.366415
OCRS2.11871_at	MIRN633	microRNA 633		1.61	OC3SNGnh.18660_x_at	VHL			NM_198156.1	von Hippel-Lindau tumor suppressor	0.365671
OC3SNGnh.13214_at	MIRN101-2	microRNA 101-2	1.95404	-1.79	OCEM.436_x_at	VHL			NM_198156.1	von Hippel-Lindau tumor suppressor	0.363859
OC3SNGnh.2107_x_at	MIRN552	microRNA 552	-1.61406		OC3SNGn.3973-331a_s_at	VHL			NM_198156.1	von Hippel-Lindau tumor suppressor	0.362501
OCMX.2904.C1_x_at	MIRN548C	microRNA 548c			OC3SNGn.6983-3a_s_at	VHL			NM_198156.1	von Hippel-Lindau tumor suppressor	0.359104
OCADNP.1035_s_at	MIRN659	microRNA 659		-1.54	OC3SNGn.6983-3a_s_at	VHL			NM_198156.1	von Hippel-Lindau tumor suppressor	0.357829
OC3SNGnh.6784_at	MIRN33A	microRNA 33a		1.52	OC3SNGnh.18660_x_at	VHL			NM_198156.1	von Hippel-Lindau tumor suppressor	0.357713
OCMXSNG.4409_at	MIRN7-1	microRNA 7-1		1.78	OC3SNGnh.18660_x_at	VHL			NM_198156.1	von Hippel-Lindau tumor suppressor	0.357008
OC3SNGnh.2542_at	MIRN103-1	microRNA 103-1		1.94	OC3P.7402.C2_x_at	VHL			NM_198156.1	von Hippel-Lindau tumor suppressor	0.355126
OCRS2.3174_at	MIRN661	microRNA 661		1.54	OC3P.7402.C2_x_at	VHL			NM_198156.1	von Hippel-Lindau tumor suppressor	0.353372
OC3SNGnh.696_at	MIRN569	microRNA 569		1.92	OCEM.436_x_at	VHL			NM_198156.1	von Hippel-Lindau tumor suppressor	0.352675
OC3SNGnh.130_s_at	MIRN93	microRNA 93		1.64	OC3SNGn.6984-474a_x_at	VHL			NM_198156.1	von Hippel-Lindau tumor suppressor	0.351493
OC3SNGnh.6176_x_at	MIRN101-1	microRNA 101-1	1.60869		OC3SNGnh.20028_x_at	VHL			NM_198156.1	von Hippel-Lindau tumor suppressor	0.350997
OC3SNGnh.7186_x_at	MIRN628	microRNA 628		1.55	OC3P.7402.C2_x_at	VHL			NM_198156.1	von Hippel-Lindau tumor suppressor	0.349448
OCRS2.2867_s_at	MIRN198	microRNA 198		1.6	OC3SNGnh.20028_x_at	VHL			NM_198156.1	von Hippel-Lindau tumor suppressor	0.348351
OC3SNGnh.13337_x_at	MIRN7-3	microRNA 7-3	2.10284		OC3SNGn.6984-474a_x_at	VHL			NM_198156.1	von Hippel-Lindau tumor suppressor	0.347847
OC3SNGnh.10216_x_at	MIRN548A2	microRNA 548a-2	-1.5706	2.12	OCEM.436_x_at	VHL			NM_198156.1	von Hippel-Lindau tumor suppressor	0.346342
OC3SNGnh.16061_x_at	MIRN604	microRNA 604			OCEM.436_x_at	VHL			NM_198156.1	von Hippel-Lindau tumor suppressor	0.345861
OCMX.6961.C1_at	MIRN30E	microRNA 30e			OC3P.7402.C2_x_at	VHL			NM_198156.1	von Hippel-Lindau tumor suppressor	0.344435
OCMXSNG.4409_at	MIRN7-1	microRNA 7-1		1.78	OC3P.7402.C1_s_at	VHL		-1.79	NM_198156.1	von Hippel-Lindau tumor suppressor	0.342843
OC3SNGnh.14278_at	MIRN339	microRNA 339		1.64	OC3SNGn.6984-474a_x_at	VHL			NM_198156.1	von Hippel-Lindau tumor suppressor	0.340187
OC3SNGnh.4055_at	MIRN103-2	microRNA 103-2		2.04	OCEM.436_x_at	VHL			NM_198156.1	von Hippel-Lindau tumor suppressor	0.33971
OC3SNGnh.5613_x_at	GPR162	microRNA 200c		2.05	OC3SNGn.6984-474a_x_at	VHL			NM_198156.1	von Hippel-Lindau tumor suppressor	0.336117
OCMX.6115.C1_x_at	MIRN301A	microRNA 301a		-1.6	OC3SNGn.6984-474a_x_at	VHL			NM_198156.1	von Hippel-Lindau tumor suppressor	0.332462
OCMXSNG.4688_x_at	MIRN564	microRNA 564			OC3SNGn.3973-331a_s_at	VHL			NM_198156.1	von Hippel-Lindau tumor suppressor	0.331412
OC3SNGnh.15682_x_at	MIRN199B	microRNA 199b	1.96522		OC3P.7402.C2_x_at	VHL			NM_198156.1	von Hippel-Lindau tumor suppressor	0.323648
OC3SNGnh.5613_x_at	GPR162	microRNA 200c		2.05	OC3SNGn.6983-3a_s_at	VHL			NM_198156.1	von Hippel-Lindau tumor suppressor	0.323636
OC3SNGnh.5613_x_at	GPR162	microRNA 200c		2.05	OC3SNGnh.18660_x_at	VHL			NM_198156.1	von Hippel-Lindau tumor suppressor	0.323358
OC3SNGnh.2220_at	MIRN149	microRNA 149		1.75	OC3SNGnh.20028_x_at	VHL			NM_198156.1	von Hippel-Lindau tumor suppressor	0.32288
OC3SNGnh.6176_x_at	MIRN101-1	microRNA 101-1	1.60869		OCEM.436_x_at	VHL			NM_198156.1	von Hippel-Lindau tumor suppressor	0.321811
OCRS2.13103_s_at	MIRN124-3	microRNA 124-3			OC3P.7402.C2_x_at	VHL			NM_198156.1	von Hippel-Lindau tumor suppressor	0.321574
OC3SNGnh.4055_at	MIRN103-2	microRNA 103-2		2.04	OC3P.7402.C1_s_at	VHL		-1.79	NM_198156.1	von Hippel-Lindau tumor suppressor	0.320801
OC3SNGnh.18430_at	MIRN566	microRNA 566	-1.63878	1.54	OCEM.436_x_at	VHL			NM_198156.1	von Hippel-Lindau tumor suppressor	0.318803
OCRS2.11871_at	MIRN633	microRNA 633		1.61	OC3SNGn.6983-3a_s_at	VHL			NM_198156.1	von Hippel-Lindau tumor suppressor	0.317776
OCMX.8490.C1_at	MIRN139	microRNA 139		1.55	OC3SNGn.6984-474a_x_at	VHL			NM_198156.1	von Hippel-Lindau tumor suppressor	0.317264
OCRS2.5576_x_at	MIRN324	microRNA 324			OC3SNGn.6983-3a_s_at	VHL			NM_198156.1	von Hippel-Lindau tumor suppressor	0.316485
OCMXSNG.4409_at	MIRN7-1	microRNA 7-1		1.78	OC3SNGn.6983-3a_s_at	VHL			NM_198156.1	von Hippel-Lindau tumor suppressor	0.314784
OCMXSNG.1606_at	MIRN593	microRNA 593			OC3SNGnh.20028_x_at	VHL			NM_198156.1	von Hippel-Lindau tumor suppressor	0.31447
OCUTR.226_x_at	MIRN301B	microRNA 301b		1.55	OC3SNGnh.18660_x_at	VHL			NM_198156.1	von Hippel-Lindau tumor suppressor	0.314262
OCRS2.5520_s_at	MIRN659	microRNA 659			OC3SNGn.6984-474a_x_at	VHL			NM_198156.1	von Hippel-Lindau tumor suppressor	0.312325
OC3P.3864.C1_at	MIRN555	microRNA 555		-1.5	OC3SNGn.6984-474a_x_at	VHL			NM_198156.1	von Hippel-Lindau tumor suppressor	0.310401
OC3SNGnh.13214_at	MIRN101-2	microRNA 101-2	1.95404	-1.79	OC3SNGn.6983-3a_s_at	VHL			NM_198156.1	von Hippel-Lindau tumor suppressor	0.309126
OCRS2.13103_s_at	MIRN124-3	microRNA 124-3			OC3SNGnh.18660_x_at	VHL			NM_198156.1	von Hippel-Lindau tumor suppressor	0.308264
OC3SNGnh.16061_x_at	MIRN604	microRNA 604			OC3P.7402.C2_x_at	VHL			NM_198156.1	von Hippel-Lindau tumor suppressor	0.303864
OC3SNGnh.6784_at	MIRN33A	microRNA 33a		1.52	OCEM.436_x_at	VHL			NM_198156.1	von Hippel-Lindau tumor suppressor	0.303612
OC3SNGnh.17094_at	MIRN611	microRNA 611		-1.55	OC3SNGnh.18660_x_at	VHL			NM_198156.1	von Hippel-Lindau tumor suppressor	0.303146
OC3SNGnh.13689_x_at	MIRN642	microRNA 642	-1.55694		OC3P.5320.C1_s_at	VHL		1.54	NM_198156.1	von Hippel-Lindau tumor suppressor	0.302727
OCMXSNG.4688_x_at	MIRN564	microRNA 564			OC3SNGnh.20028_x_at	VHL			NM_198156.1	von Hippel-Lindau tumor suppressor	0.301815
OCMXSNG.1606_at	MIRN593	microRNA 593			OC3SNGn.6983-3a_s_at	VHL			NM_198156.1	von Hippel-Lindau tumor suppressor	0.297096
OC3P.13017.C1_x_at	MIRN181D	microRNA 181d		1.51	OC3P.7402.C2_x_at	VHL			NM_198156.1	von Hippel-Lindau tumor suppressor	0.295143
OC3SNGnh.18430_at	MIRN566	microRNA 566	-1.63878	1.54	OC3P.5320.C1_s_at	VHL		1.54	NM_198156.1	von Hippel-Lindau tumor suppressor	0.295093
OC3SNGnh.14368_at	MIRN614	microRNA 614		-1.76	OC3SNGnh.18660_x_at	VHL			NM_198156.1	von Hippel-Lindau tumor suppressor	0.29419
OC3SNGnh.8532_x_at	MIRN187	microRNA 187			OC3SNGn.6984-474a_x_at	VHL			NM_198156.1	von Hippel-Lindau tumor suppressor	0.293865
OC3SNGnh.2220_at	MIRN149	microRNA 149		1.75	OC3P.7402.C1_s_at	VHL		-1.79	NM_198156.1	von Hippel-Lindau tumor suppressor	0.292893
OC3SNGnh.13337_x_at	MIRN7-3	microRNA 7-3	2.10284		OC3P.7402.C2_x_at	VHL			NM_198156.1	von Hippel-Lindau tumor suppressor	0.29192
OCMXSNG.1606_at	MIRN593	microRNA 593			OC3P.7402.C2_x_at	VHL			NM_198156.1	von Hippel-Lindau tumor suppressor	0.290975
OC3SNGnh.14368_at	MIRN614	microRNA 614		-1.76	OC3SNGn.6983-3a_s_at	VHL			NM_198156.1	von Hippel-Lindau tumor suppressor	0.280918
OC3SNGnh.4795_x_at	MIRN573	microRNA 573			OCEM.436_x_at	VHL			NM_198156.1	von Hippel-Lindau tumor suppressor	0.276657
OC3SNGnh.8263_at	MIRN449B	microRNA 449b			OCEM.436_at	VHL			NM_198156.1	von Hippel-Lindau tumor suppressor	0.276091
OC3SNGnh.14117_at	MIRN557	microRNA 557			OC3SNGn.6983-3a_s_at	VHL			NM_198156.1	von Hippel-Lindau tumor suppressor	0.275933
OC3SNGnh.18430_at	MIRN566	microRNA 566	-1.63878	1.54	OC3SNGnh.18660_x_at	VHL			NM_198156.1	von Hippel-Lindau tumor suppressor	0.27542
OC3SNGnh.14368_at	MIRN614	microRNA 614		-1.76	OC3SNGn.6984-474a_x_at	VHL			NM_198156.1	von Hippel-Lindau tumor suppressor	0.274219
OC3SNGnh.14375_x_at	MIRN181B2	microRNA 181b-2		-1.58	OC3SNGn.3973-331a_s_at	VHL			NM_198156.1	von Hippel-Lindau tumor suppressor	0.271845
OCMXSNG.4688_x_at	MIRN564	microRNA 564			OC3SNGn.6984-474a_x_at	VHL			NM_198156.1	von Hippel-Lindau tumor suppressor	0.271772
OCUTR.226_x_at	MIRN301B	microRNA 301b		1.55	OC3SNGn.6984-474a_x_at	VHL			NM_198156.1	von Hippel-Lindau tumor suppressor	0.27091
OCRS2.5520_s_at	MIRN659	microRNA 659			OC3P.7402.C2_x_at	VHL			NM_198156.1	von Hippel-Lindau tumor suppressor	0.262039
OC3SNGnh.14375_x_at	MIRN181B2	microRNA 181b-2		-1.58	OC3SNGn.6984-474a_x_at	VHL			NM_198156.1	von Hippel-Lindau tumor suppressor	0.259722
OC3P.3864.C1_x_at	MIRN555	microRNA 555		1.56	OC3SNGn.6983-3a_s_at	VHL			NM_198156.1	von Hippel-Lindau tumor suppressor	0.258815
OCMXSNG.4409_at	MIRN7-1	microRNA 7-1		1.78	OC3SNGn.6984-474a_x_at	VHL			NM_198156.1	von Hippel-Lindau tumor suppressor	0.258414
OC3SNGnh.2542_at	MIRN103-1	microRNA 103-1		1.94	OC3SNGn.6984-474a_x_at	VHL			NM_198156.1	von Hippel-Lindau tumor suppressor	0.256564
OC3SNGnh.11550_at	MIRN29C	microRNA 29c		1.55	OC3P.7402.C1_s_at	VHL		-1.79	NM_198156.1	von Hippel-Lindau tumor suppressor	0.255288
OC3SNGnh.18430_at	MIRN566	microRNA 566	-1.63878	1.54	OC3P.7402.C1_s_at	VHL		-1.79	NM_198156.1	von Hippel-Lindau tumor suppressor	0.255014
OC3SNGnh.8263_at	MIRN449B	microRNA 449b			OC3SNGn.6984-474a_x_at	VHL			NM_198156.1	von Hippel-Lindau tumor suppressor	0.2444
OC3P.3864.C1_x_at	MIRN555	microRNA 555		1.56	OC3P.7402.C1_s_at	VHL		-1.79	NM_198156.1	von Hippel-Lindau tumor suppressor	0.244212
OCADNP.1035_s_at	MIRN659	microRNA 659		-1.54	OCEM.436_x_at	VHL			NM_198156.1	von Hippel-Lindau tumor suppressor	0.239077
OC3SNGnh.4795_x_at	MIRN573	microRNA 573			OC3P.7402.C1_s_at	VHL		-1.79	NM_198156.1	von Hippel-Lindau tumor suppressor	0.234268
OC3SNGnh.16061_x_at	MIRN604	microRNA 604			OC3SNGn.6983-3a_s_at	VHL			NM_198156.1	von Hippel-Lindau tumor suppressor	0.230266
OCRS2.5576_x_at	MIRN324	microRNA 324			OC3P.7402.C1_s_at	VHL		-1.79	NM_198156.1	von Hippel-Lindau tumor suppressor	0.23021
OCRS2.3174_at	MIRN661	microRNA 661		1.54	OC3SNGn.6984-474a_x_at	VHL			NM_198156.1	von Hippel-Lindau tumor suppressor	0.229355
OC3SNGnh.4795_x_at	MIRN573	microRNA 573			OC3P.7402.C2_x_at	VHL			NM_198156.1	von Hippel-Lindau tumor suppressor	0.228094
OC3SNGnh.2220_at	MIRN149	microRNA 149		1.75	OCEM.436_x_at	VHL			NM_198156.1	von Hippel-Lindau tumor suppressor	0.228047
OC3SNGnh.16061_x_at	MIRN604	microRNA 604			OC3SNGn.6984-474a_x_at	VHL			NM_198156.1	von Hippel-Lindau tumor suppressor	0.22664
OC3SNGnh.15682_x_at	MIRN199B	microRNA 199b	1.96522		OC3P.7402.C1_s_at	VHL		-1.79	NM_198156.1	von Hippel-Lindau tumor suppressor	0.22654
OC3SNGnh.331_at	MIRN597	microRNA 597			OC3SNGn.6984-474a_x_at	VHL			NM_198156.1	von Hippel-Lindau tumor suppressor	0.22498
OC3SNGnh.331_at	MIRN597	microRNA 597			OC3P.7402.C2_x_at	VHL			NM_198156.1	von Hippel-Lindau tumor suppressor	0.224665
OCRS2.2867_s_at	MIRN198	microRNA 198		1.6	OCEM.436_x_at	VHL			NM_198156.1	von Hippel-Lindau tumor suppressor	0.223831
OCADNP.18636_s_at	MIRN572	microRNA 572			OC3SNGnh.20028_x_at	VHL			NM_198156.1	von Hippel-Lindau tumor suppressor	0.222302
OC3P.3864.C1_x_at	MIRN555	microRNA 555		1.56	OC3P.7402.C2_x_at	VHL			NM_198156.1	von Hippel-Lindau tumor suppressor	0.22169
OC3SNGnh.2542_at	MIRN103-1	microRNA 103-1		1.94	OCEM.436_x_at	VHL			NM_198156.1	von Hippel-Lindau tumor suppressor	0.218386
OC3P.2409.C1_s_at	MIRN21	microRNA 21		1.86	OC3SNGn.6984-474a_x_at	VHL			NM_198156.1	von Hippel-Lindau tumor suppressor	0.217113
OCRS2.5576_x_at	MIRN324	microRNA 324			OC3SNGnh.18660_x_at	VHL			NM_198156.1	von Hippel-Lindau tumor suppressor	0.205262
OCRS2.551_x_at	MIRN129-1	microRNA 129-1			OC3SNGnh.18660_x_at	VHL			NM_198156.1	von Hippel-Lindau tumor suppressor	0.203858
OC3SNGnh.14547_x_at	MIRN345	microRNA 345			OCEM.436_x_at	VHL			NM_198156.1	von Hippel-Lindau tumor suppressor	0.202699
OC3SNGnh.12857_x_at	MIRN600	microRNA 600			OC3P.7402.C2_x_at	VHL			NM_198156.1	von Hippel-Lindau tumor suppressor	0.200669
OC3SNGnh.13689_x_at	MIRN642	microRNA 642	-1.55694		OC3SNGn.3973-331a_s_at	VHL			NM_198156.1	von Hippel-Lindau tumor suppressor	0.197774
OC3P.2409.C1_s_at	MIRN21	microRNA 21		1.86	OC3P.7402.C1_s_at	VHL		-1.79	NM_198156.1	von Hippel-Lindau tumor suppressor	0.197312
OC3SNGnh.14547_x_at	MIRN345	microRNA 345			OC3P.7402.C2_x_at	VHL			NM_198156.1	von Hippel-Lindau tumor suppressor	0.190772
OC3SNGnh.2220_at	MIRN149	microRNA 149		1.75	OC3SNGnh.18660_x_at	VHL			NM_198156.1	von Hippel-Lindau tumor suppressor	0.190429
OCMX.2899.C1_at	MIRN210	microRNA 210		1.76	OC3P.7402.C2_x_at	VHL			NM_198156.1	von Hippel-Lindau tumor suppressor	0.190259
OC3SNGnh.331_at	MIRN597	microRNA 597			OCEM.436_x_at	VHL			NM_198156.1	von Hippel-Lindau tumor suppressor	0.183713
OC3SNGnh.696_at	MIRN569	microRNA 569		1.92	OC3P.7402.C1_s_at	VHL		-1.79	NM_198156.1	von Hippel-Lindau tumor suppressor	0.182837
OC3SNGnh.12857_x_at	MIRN600	microRNA 600			OC3P.7402.C1_s_at	VHL		-1.79	NM_198156.1	von Hippel-Lindau tumor suppressor	0.181138
OC3SNGnh.15682_x_at	MIRN199B	microRNA 199b	1.96522		OCEM.436_x_at	VHL			NM_198156.1	von Hippel-Lindau tumor suppressor	0.180411
OC3P.11403.C1_s_at	GPR162	microRNA 200c	-1.8663	-1.63	OC3P.5320.C1_s_at	VHL		1.54	NM_198156.1	von Hippel-Lindau tumor suppressor	0.17982
OC3SNGnh.14547_x_at	MIRN345	microRNA 345			OC3SNGnh.18660_x_at	VHL			NM_198156.1	von Hippel-Lindau tumor suppressor	0.179482
OCADNP.18636_s_at	MIRN572	microRNA 572			OC3SNGn.6984-474a_x_at	VHL			NM_198156.1	von Hippel-Lindau tumor suppressor	0.170348
OC3SNGnh.10216_x_at	MIRN548A2	microRNA 548a-2	-1.5706	2.12	OC3SNGnh.20028_x_at	VHL			NM_198156.1	von Hippel-Lindau tumor suppressor	0.168079
OC3SNGnh.4795_x_at	MIRN573	microRNA 573			OC3SNGn.6983-3a_s_at	VHL			NM_198156.1	von Hippel-Lindau tumor suppressor	0.166762
OC3SNGnh.130_s_at	MIRN93	microRNA 93		1.64	OC3SNGn.6983-3a_s_at	VHL			NM_198156.1	von Hippel-Lindau tumor suppressor	0.166428
OCMX.12017.C1_at	MIRN146B	microRNA 146b			OC3P.5320.C1_s_at	VHL		1.54	NM_198156.1	von Hippel-Lindau tumor suppressor	0.165727
OCRS2.13103_s_at	MIRN124-3	microRNA 124-3			OC3SNGn.6984-474a_x_at	VHL			NM_198156.1	von Hippel-Lindau tumor suppressor	0.164574
OCRS2.5576_x_at	MIRN324	microRNA 324			OC3SNGn.6984-474a_x_at	VHL			NM_198156.1	von Hippel-Lindau tumor suppressor	0.163967
OCADNP.18636_s_at	MIRN572	microRNA 572			OC3SNGn.3973-331a_s_at	VHL			NM_198156.1	von Hippel-Lindau tumor suppressor	0.159962
OC3SNGnh.10536_at	MIRN101-1	microRNA 101-1		1.63	OC3SNGn.6984-474a_x_at	VHL			NM_198156.1	von Hippel-Lindau tumor suppressor	0.159385
OCMX.3940.C1_at	MIRN625	microRNA 625		1.51	OC3P.5320.C1_s_at	VHL		1.54	NM_198156.1	von Hippel-Lindau tumor suppressor	0.15614
OC3SNGnh.6176_x_at	MIRN101-1	microRNA 101-1	1.60869		OCEM.436_at	VHL			NM_198156.1	von Hippel-Lindau tumor suppressor	0.154423
OC3SNGnh.14375_x_at	MIRN181B2	microRNA 181b-2		-1.58	OCEM.436_at	VHL			NM_198156.1	von Hippel-Lindau tumor suppressor	0.154083
OC3SNGnh.5421_at	MIRN561	microRNA 561	-2.17845		OCEM.436_at	VHL			NM_198156.1	von Hippel-Lindau tumor suppressor	0.153769
OCMX.8490.C1_at	MIRN139	microRNA 139		1.55	OC3SNGnh.18660_x_at	VHL			NM_198156.1	von Hippel-Lindau tumor suppressor	0.149966
OC3SNGnh.2220_at	MIRN149	microRNA 149		1.75	OC3SNGn.6983-3a_s_at	VHL			NM_198156.1	von Hippel-Lindau tumor suppressor	0.149755
OC3SNGnh.13689_x_at	MIRN642	microRNA 642	-1.55694		OC3P.7402.C1_s_at	VHL		-1.79	NM_198156.1	von Hippel-Lindau tumor suppressor	0.148605
OCMX.3940.C1_at	MIRN625	microRNA 625		1.51	OC3SNGnh.18660_x_at	VHL			NM_198156.1	von Hippel-Lindau tumor suppressor	0.147898
OCRS2.5576_x_at	MIRN324	microRNA 324			OCEM.436_x_at	VHL			NM_198156.1	von Hippel-Lindau tumor suppressor	0.146762
OCMXSNG.4688_x_at	MIRN564	microRNA 564			OC3SNGn.6983-3a_s_at	VHL			NM_198156.1	von Hippel-Lindau tumor suppressor	0.145435
OCMX.2899.C1_at	MIRN210	microRNA 210		1.76	OC3SNGn.6984-474a_x_at	VHL			NM_198156.1	von Hippel-Lindau tumor suppressor	0.144727
OCRS2.2867_s_at	MIRN198	microRNA 198		1.6	OC3P.7402.C2_x_at	VHL			NM_198156.1	von Hippel-Lindau tumor suppressor	0.14364
OCRS2.11871_at	MIRN633	microRNA 633		1.61	OCEM.436_x_at	VHL			NM_198156.1	von Hippel-Lindau tumor suppressor	0.142606
OC3SNGnh.8370_at	MIRN138-2	microRNA 138-2			OC3SNGn.6983-3a_s_at	VHL			NM_198156.1	von Hippel-Lindau tumor suppressor	0.139839
OC3P.13017.C1_x_at	MIRN181D	microRNA 181d		1.51	OCEM.436_x_at	VHL			NM_198156.1	von Hippel-Lindau tumor suppressor	0.134355
OCMXSNG.4409_at	MIRN7-1	microRNA 7-1		1.78	OCEM.436_x_at	VHL			NM_198156.1	von Hippel-Lindau tumor suppressor	0.131572
OCMX.6115.C1_x_at	MIRN301A	microRNA 301a		-1.6	OC3P.7402.C2_x_at	VHL			NM_198156.1	von Hippel-Lindau tumor suppressor	0.131249
OC3P.12763.C1_at	MIRN151	microRNA 151			OC3P.7402.C1_s_at	VHL		-1.79	NM_198156.1	von Hippel-Lindau tumor suppressor	0.129726
OCADNP.13786_s_at	MIRN301B	microRNA 301b	-1.50238		OC3P.5320.C1_s_at	VHL		1.54	NM_198156.1	von Hippel-Lindau tumor suppressor	0.128984
OC3P.11403.C1_s_at	GPR162	microRNA 200c	-1.8663	-1.63	OC3P.7402.C1_s_at	VHL		-1.79	NM_198156.1	von Hippel-Lindau tumor suppressor	0.123047
OC3SNGnh.17336_x_at	MIRN559	microRNA 559			OC3P.5320.C1_s_at	VHL		1.54	NM_198156.1	von Hippel-Lindau tumor suppressor	0.122591
OC3SNGnh.8532_x_at	MIRN187	microRNA 187			OC3SNGnh.18660_x_at	VHL			NM_198156.1	von Hippel-Lindau tumor suppressor	0.11968
OC3SNGnh.16592_x_at	MIRN425	microRNA 425			OC3SNGnh.20028_x_at	VHL			NM_198156.1	von Hippel-Lindau tumor suppressor	0.1164
OC3SNGnh.4055_at	MIRN103-2	microRNA 103-2		2.04	OC3SNGnh.18660_x_at	VHL			NM_198156.1	von Hippel-Lindau tumor suppressor	0.114724
OC3SNGnh.16267_at	MIRN497	microRNA 497		3.19	OCEM.436_x_at	VHL			NM_198156.1	von Hippel-Lindau tumor suppressor	0.112112
OCRS2.2867_s_at	MIRN198	microRNA 198		1.6	OC3SNGn.6984-474a_x_at	VHL			NM_198156.1	von Hippel-Lindau tumor suppressor	0.111054
OC3SNGnh.4055_at	MIRN103-2	microRNA 103-2		2.04	OC3SNGn.6984-474a_x_at	VHL			NM_198156.1	von Hippel-Lindau tumor suppressor	0.10919
OC3SNGnh.17336_x_at	MIRN559	microRNA 559			OC3P.7402.C1_s_at	VHL		-1.79	NM_198156.1	von Hippel-Lindau tumor suppressor	0.105828
OC3SNGnh.2542_at	MIRN103-1	microRNA 103-1		1.94	OC3SNGn.6983-3a_s_at	VHL			NM_198156.1	von Hippel-Lindau tumor suppressor	0.101993
OC3SNGnh.16168_x_at	MIRN576	microRNA 576		-1.54	OCEM.436_at	VHL			NM_198156.1	von Hippel-Lindau tumor suppressor	0.0993321
OCADNP.13786_s_at	MIRN301B	microRNA 301b	-1.50238		OC3P.7402.C1_s_at	VHL		-1.79	NM_198156.1	von Hippel-Lindau tumor suppressor	0.0982008
OC3SNGnh.16592_x_at	MIRN425	microRNA 425			OC3P.7402.C1_s_at	VHL		-1.79	NM_198156.1	von Hippel-Lindau tumor suppressor	0.0969522
OCMXSNG.4409_at	MIRN7-1	microRNA 7-1		1.78	OC3P.7402.C2_x_at	VHL			NM_198156.1	von Hippel-Lindau tumor suppressor	0.0910054
OC3P.12763.C1_x_at	MIRN151	microRNA 151		1.74	OC3P.7402.C1_s_at	VHL		-1.79	NM_198156.1	von Hippel-Lindau tumor suppressor	0.0878992
OCMX.12930.C1_at	MIRN22	microRNA 22		1.66	OC3P.7402.C2_x_at	VHL			NM_198156.1	von Hippel-Lindau tumor suppressor	0.0813109
OC3P.3864.C1_at	MIRN555	microRNA 555		-1.5	OC3SNGnh.18660_x_at	VHL			NM_198156.1	von Hippel-Lindau tumor suppressor	0.0806607
OC3P.2409.C1_s_at	MIRN21	microRNA 21		1.86	OCEM.436_x_at	VHL			NM_198156.1	von Hippel-Lindau tumor suppressor	0.0782071
OCEM.162_at	MIRN592	microRNA 592			OCEM.436_x_at	VHL			NM_198156.1	von Hippel-Lindau tumor suppressor	0.0759685
OC3P.12763.C1_x_at	MIRN151	microRNA 151		1.74	OC3SNGnh.20028_x_at	VHL			NM_198156.1	von Hippel-Lindau tumor suppressor	0.0752641
OC3SNGnh.696_at	MIRN569	microRNA 569		1.92	OC3SNGn.6984-474a_x_at	VHL			NM_198156.1	von Hippel-Lindau tumor suppressor	0.0752303
OC3P.2409.C1_s_at	MIRN21	microRNA 21		1.86	OC3SNGnh.18660_x_at	VHL			NM_198156.1	von Hippel-Lindau tumor suppressor	0.0746173
OCMX.2904.C1_x_at	MIRN548C	microRNA 548c			OC3SNGn.6984-474a_x_at	VHL			NM_198156.1	von Hippel-Lindau tumor suppressor	0.0731161
OC3SNGnh.8532_x_at	MIRN187	microRNA 187			OC3SNGn.3973-331a_s_at	VHL			NM_198156.1	von Hippel-Lindau tumor suppressor	0.0701553
OCRS2.5520_s_at	MIRN659	microRNA 659			OC3SNGnh.18660_x_at	VHL			NM_198156.1	von Hippel-Lindau tumor suppressor	0.06858
OCEM.162_at	MIRN592	microRNA 592			OC3SNGn.3973-331a_s_at	VHL			NM_198156.1	von Hippel-Lindau tumor suppressor	0.0678899
OCRS2.2867_s_at	MIRN198	microRNA 198		1.6	OC3SNGn.6983-3a_s_at	VHL			NM_198156.1	von Hippel-Lindau tumor suppressor	0.0675391
OCMXSNG.4688_x_at	MIRN564	microRNA 564			OCEM.436_x_at	VHL			NM_198156.1	von Hippel-Lindau tumor suppressor	0.0616881
OC3SNGnh.7186_x_at	MIRN628	microRNA 628		1.55	OC3SNGn.6983-3a_s_at	VHL			NM_198156.1	von Hippel-Lindau tumor suppressor	0.0566393
OC3SNGnh.14278_at	MIRN339	microRNA 339		1.64	OC3SNGnh.18660_x_at	VHL			NM_198156.1	von Hippel-Lindau tumor suppressor	0.0562758
OC3SNGnh.14375_x_at	MIRN181B2	microRNA 181b-2		-1.58	OC3SNGnh.18660_x_at	VHL			NM_198156.1	von Hippel-Lindau tumor suppressor	0.0552996
OCMX.2904.C1_x_at	MIRN548C	microRNA 548c			OC3P.7402.C2_x_at	VHL			NM_198156.1	von Hippel-Lindau tumor suppressor	0.0530225
OCMX.12930.C1_at	MIRN22	microRNA 22		1.66	OC3SNGn.6984-474a_x_at	VHL			NM_198156.1	von Hippel-Lindau tumor suppressor	0.0485462
OC3SNGnh.13214_at	MIRN101-2	microRNA 101-2	1.95404	-1.79	OCEM.436_at	VHL			NM_198156.1	von Hippel-Lindau tumor suppressor	0.0484666
OC3P.11403.C1_s_at	GPR162	microRNA 200c	-1.8663	-1.63	OC3P.7402.C2_x_at	VHL			NM_198156.1	von Hippel-Lindau tumor suppressor	0.0468592
OC3SNGnh.331_at	MIRN597	microRNA 597			OC3SNGn.6983-3a_s_at	VHL			NM_198156.1	von Hippel-Lindau tumor suppressor	0.0440166
OC3SNGnh.14831_at	MIRN582	microRNA 582		2.31	OC3SNGn.6983-3a_s_at	VHL			NM_198156.1	von Hippel-Lindau tumor suppressor	0.0425005
OCMXSNG.1606_at	MIRN593	microRNA 593			OC3SNGn.6984-474a_x_at	VHL			NM_198156.1	von Hippel-Lindau tumor suppressor	0.0424605
OCMX.3940.C1_at	MIRN625	microRNA 625		1.51	OC3SNGnh.20028_x_at	VHL			NM_198156.1	von Hippel-Lindau tumor suppressor	0.0385609
OC3SNGnh.11550_at	MIRN29C	microRNA 29c		1.55	OC3SNGnh.20028_x_at	VHL			NM_198156.1	von Hippel-Lindau tumor suppressor	0.0363188
OC3P.2409.C1_s_at	MIRN21	microRNA 21		1.86	OC3P.7402.C2_x_at	VHL			NM_198156.1	von Hippel-Lindau tumor suppressor	0.0347831
OC3SNGnh.8370_at	MIRN138-2	microRNA 138-2			OCEM.436_x_at	VHL			NM_198156.1	von Hippel-Lindau tumor suppressor	0.0345788
OCMX.12017.C1_at	MIRN146B	microRNA 146b			OC3SNGnh.18660_x_at	VHL			NM_198156.1	von Hippel-Lindau tumor suppressor	0.033476
OC3SNGnh.16168_x_at	MIRN576	microRNA 576		-1.54	OC3P.7402.C1_s_at	VHL		-1.79	NM_198156.1	von Hippel-Lindau tumor suppressor	0.0317084
OC3SNGnh.2220_at	MIRN149	microRNA 149		1.75	OC3SNGn.6984-474a_x_at	VHL			NM_198156.1	von Hippel-Lindau tumor suppressor	0.0273701
OC3SNGnh.130_s_at	MIRN93	microRNA 93		1.64	OC3SNGnh.18660_x_at	VHL			NM_198156.1	von Hippel-Lindau tumor suppressor	0.0269182
OC3SNGnh.16168_x_at	MIRN576	microRNA 576		-1.54	OC3P.7402.C2_x_at	VHL			NM_198156.1	von Hippel-Lindau tumor suppressor	0.0267073
OC3SNGnh.11550_at	MIRN29C	microRNA 29c		1.55	OCEM.436_x_at	VHL			NM_198156.1	von Hippel-Lindau tumor suppressor	0.0175062
OC3SNGnh.16168_x_at	MIRN576	microRNA 576		-1.54	OC3P.5320.C1_s_at	VHL		1.54	NM_198156.1	von Hippel-Lindau tumor suppressor	0.013659
OC3SNGnh.17336_x_at	MIRN559	microRNA 559			OCEM.436_at	VHL			NM_198156.1	von Hippel-Lindau tumor suppressor	0.0136214
OCMX.2899.C1_at	MIRN210	microRNA 210		1.76	OC3SNGnh.18660_x_at	VHL			NM_198156.1	von Hippel-Lindau tumor suppressor	0.0117342
OC3SNGnh.14117_at	MIRN557	microRNA 557			OC3SNGnh.18660_x_at	VHL			NM_198156.1	von Hippel-Lindau tumor suppressor	0.00712696
OC3SNGnh.10216_x_at	MIRN548A2	microRNA 548a-2	-1.5706	2.12	OC3P.5320.C1_s_at	VHL		1.54	NM_198156.1	von Hippel-Lindau tumor suppressor	0.00709672
OC3SNGnh.18430_at	MIRN566	microRNA 566	-1.63878	1.54	OC3SNGn.3973-331a_s_at	VHL			NM_198156.1	von Hippel-Lindau tumor suppressor	-0.000519082
OC3SNGnh.10536_at	MIRN101-1	microRNA 101-1		1.63	OC3SNGnh.18660_x_at	VHL			NM_198156.1	von Hippel-Lindau tumor suppressor	-0.00509843
OC3SNGnh.10216_x_at	MIRN548A2	microRNA 548a-2	-1.5706	2.12	OC3P.7402.C1_s_at	VHL		-1.79	NM_198156.1	von Hippel-Lindau tumor suppressor	-0.005782
OC3P.3864.C1_at	MIRN555	microRNA 555		-1.5	OCEM.436_at	VHL			NM_198156.1	von Hippel-Lindau tumor suppressor	-0.00717031
OC3SNGnh.10216_x_at	MIRN548A2	microRNA 548a-2	-1.5706	2.12	OCEM.436_at	VHL			NM_198156.1	von Hippel-Lindau tumor suppressor	-0.015001
OCADNP.18636_s_at	MIRN572	microRNA 572			OC3SNGnh.18660_x_at	VHL			NM_198156.1	von Hippel-Lindau tumor suppressor	-0.0191656
OC3SNGnh.14831_at	MIRN582	microRNA 582		2.31	OCEM.436_at	VHL			NM_198156.1	von Hippel-Lindau tumor suppressor	-0.0212546
OC3SNGnh.15682_x_at	MIRN199B	microRNA 199b	1.96522		OC3SNGn.6983-3a_s_at	VHL			NM_198156.1	von Hippel-Lindau tumor suppressor	-0.0238717
OC3SNGnh.4055_at	MIRN103-2	microRNA 103-2		2.04	OC3P.7402.C2_x_at	VHL			NM_198156.1	von Hippel-Lindau tumor suppressor	-0.0244365
OC3SNGnh.16592_x_at	MIRN425	microRNA 425			OC3SNGn.6983-3a_s_at	VHL			NM_198156.1	von Hippel-Lindau tumor suppressor	-0.0271983
OC3SNGnh.16713_at	MIRN613	microRNA 613	-2.29079		OC3P.5320.C1_s_at	VHL		1.54	NM_198156.1	von Hippel-Lindau tumor suppressor	-0.029782
OC3SNGnh.14117_at	MIRN557	microRNA 557			OC3P.5320.C1_s_at	VHL		1.54	NM_198156.1	von Hippel-Lindau tumor suppressor	-0.033356
OC3SNGnh.13689_x_at	MIRN642	microRNA 642	-1.55694		OCEM.436_x_at	VHL			NM_198156.1	von Hippel-Lindau tumor suppressor	-0.0359442
OC3SNGnh.13689_x_at	MIRN642	microRNA 642	-1.55694		OC3SNGn.6983-3a_s_at	VHL			NM_198156.1	von Hippel-Lindau tumor suppressor	-0.0397683
OCRS2.5576_x_at	MIRN324	microRNA 324			OC3P.7402.C2_x_at	VHL			NM_198156.1	von Hippel-Lindau tumor suppressor	-0.0418322
OC3SNGnh.2220_at	MIRN149	microRNA 149		1.75	OC3P.7402.C2_x_at	VHL			NM_198156.1	von Hippel-Lindau tumor suppressor	-0.0476542
OC3SNGnh.8532_x_at	MIRN187	microRNA 187			OC3SNGnh.20028_x_at	VHL			NM_198156.1	von Hippel-Lindau tumor suppressor	-0.0484027
OC3P.12763.C1_at	MIRN151	microRNA 151			OC3SNGnh.20028_x_at	VHL			NM_198156.1	von Hippel-Lindau tumor suppressor	-0.0493544
OCMX.6115.C1_x_at	MIRN301A	microRNA 301a		-1.6	OC3SNGnh.20028_x_at	VHL			NM_198156.1	von Hippel-Lindau tumor suppressor	-0.0501899
OC3P.12763.C1_x_at	MIRN151	microRNA 151		1.74	OC3SNGn.6984-474a_x_at	VHL			NM_198156.1	von Hippel-Lindau tumor suppressor	-0.0533309
OC3P.2409.C1_s_at	MIRN21	microRNA 21		1.86	OC3SNGn.6983-3a_s_at	VHL			NM_198156.1	von Hippel-Lindau tumor suppressor	-0.0560856
OC3SNGnh.8192_at	MIRN581	microRNA 581		1.53	OC3SNGnh.18660_x_at	VHL			NM_198156.1	von Hippel-Lindau tumor suppressor	-0.0572781
OC3SNGnh.13214_at	MIRN101-2	microRNA 101-2	1.95404	-1.79	OC3SNGnh.18660_x_at	VHL			NM_198156.1	von Hippel-Lindau tumor suppressor	-0.0639688
OCMX.12017.C1_at	MIRN146B	microRNA 146b			OC3P.7402.C2_x_at	VHL			NM_198156.1	von Hippel-Lindau tumor suppressor	-0.0669083
OC3SNGnh.7186_x_at	MIRN628	microRNA 628		1.55	OCEM.436_x_at	VHL			NM_198156.1	von Hippel-Lindau tumor suppressor	-0.067654
OC3SNGnh.6176_x_at	MIRN101-1	microRNA 101-1	1.60869		OC3SNGn.6983-3a_s_at	VHL			NM_198156.1	von Hippel-Lindau tumor suppressor	-0.068077
OC3SNGnh.16267_at	MIRN497	microRNA 497		3.19	OC3SNGn.6983-3a_s_at	VHL			NM_198156.1	von Hippel-Lindau tumor suppressor	-0.0682239
OC3P.12763.C1_at	MIRN151	microRNA 151			OCEM.436_x_at	VHL			NM_198156.1	von Hippel-Lindau tumor suppressor	-0.0696493
OCADNP.13786_s_at	MIRN301B	microRNA 301b	-1.50238		OC3SNGn.6983-3a_s_at	VHL			NM_198156.1	von Hippel-Lindau tumor suppressor	-0.0711587
OC3SNGnh.17053_at	GPR162	microRNA 200c		-1.55	OCEM.436_x_at	VHL			NM_198156.1	von Hippel-Lindau tumor suppressor	-0.0770949
OC3SNGnh.18430_at	MIRN566	microRNA 566	-1.63878	1.54	OC3SNGn.6983-3a_s_at	VHL			NM_198156.1	von Hippel-Lindau tumor suppressor	-0.0779139
OC3SNGnh.11550_at	MIRN29C	microRNA 29c		1.55	OC3P.7402.C2_x_at	VHL			NM_198156.1	von Hippel-Lindau tumor suppressor	-0.0844161
OC3SNGnh.17336_x_at	MIRN559	microRNA 559			OC3SNGn.6983-3a_s_at	VHL			NM_198156.1	von Hippel-Lindau tumor suppressor	-0.102805
OC3SNGnh.8532_x_at	MIRN187	microRNA 187			OC3P.7402.C2_x_at	VHL			NM_198156.1	von Hippel-Lindau tumor suppressor	-0.103937
OC3P.12763.C1_x_at	MIRN151	microRNA 151		1.74	OCEM.436_x_at	VHL			NM_198156.1	von Hippel-Lindau tumor suppressor	-0.108404
OCADNP.13786_s_at	MIRN301B	microRNA 301b	-1.50238		OCEM.436_at	VHL			NM_198156.1	von Hippel-Lindau tumor suppressor	-0.109245
OCADNP.13786_s_at	MIRN301B	microRNA 301b	-1.50238		OCEM.436_x_at	VHL			NM_198156.1	von Hippel-Lindau tumor suppressor	-0.109844
OC3SNGnh.16592_x_at	MIRN425	microRNA 425			OCEM.436_x_at	VHL			NM_198156.1	von Hippel-Lindau tumor suppressor	-0.11251
OC3P.12763.C1_at	MIRN151	microRNA 151			OC3P.7402.C2_x_at	VHL			NM_198156.1	von Hippel-Lindau tumor suppressor	-0.113623
OC3SNGnh.16592_x_at	MIRN425	microRNA 425			OC3SNGn.6984-474a_x_at	VHL			NM_198156.1	von Hippel-Lindau tumor suppressor	-0.114595
OC3SNGnh.14375_x_at	MIRN181B2	microRNA 181b-2		-1.58	OC3SNGnh.20028_x_at	VHL			NM_198156.1	von Hippel-Lindau tumor suppressor	-0.114693
OC3SNGnh.696_at	MIRN569	microRNA 569		1.92	OC3P.7402.C2_x_at	VHL			NM_198156.1	von Hippel-Lindau tumor suppressor	-0.114939
OCMX.12017.C1_at	MIRN146B	microRNA 146b			OC3P.7402.C1_s_at	VHL		-1.79	NM_198156.1	von Hippel-Lindau tumor suppressor	-0.115694
OCADNP.1035_s_at	MIRN659	microRNA 659		-1.54	OC3SNGn.3973-331a_s_at	VHL			NM_198156.1	von Hippel-Lindau tumor suppressor	-0.122208
OC3P.11403.C1_s_at	GPR162	microRNA 200c	-1.8663	-1.63	OC3SNGn.6984-474a_x_at	VHL			NM_198156.1	von Hippel-Lindau tumor suppressor	-0.124741
OC3P.11403.C1_s_at	GPR162	microRNA 200c	-1.8663	-1.63	OCEM.436_at	VHL			NM_198156.1	von Hippel-Lindau tumor suppressor	-0.125059
OC3SNGnh.11550_at	MIRN29C	microRNA 29c		1.55	OC3SNGn.6983-3a_s_at	VHL			NM_198156.1	von Hippel-Lindau tumor suppressor	-0.126198
OC3SNGnh.14375_x_at	MIRN181B2	microRNA 181b-2		-1.58	OC3P.7402.C2_x_at	VHL			NM_198156.1	von Hippel-Lindau tumor suppressor	-0.132878
OC3P.12763.C1_at	MIRN151	microRNA 151			OC3SNGn.6984-474a_x_at	VHL			NM_198156.1	von Hippel-Lindau tumor suppressor	-0.133075
OCMX.3940.C1_at	MIRN625	microRNA 625		1.51	OC3SNGn.6984-474a_x_at	VHL			NM_198156.1	von Hippel-Lindau tumor suppressor	-0.137078
OC3SNGnh.6176_x_at	MIRN101-1	microRNA 101-1	1.60869		OC3SNGnh.18660_x_at	VHL			NM_198156.1	von Hippel-Lindau tumor suppressor	-0.141405
OC3P.12763.C1_x_at	MIRN151	microRNA 151		1.74	OC3P.7402.C2_x_at	VHL			NM_198156.1	von Hippel-Lindau tumor suppressor	-0.142392
OC3SNGnh.10216_x_at	MIRN548A2	microRNA 548a-2	-1.5706	2.12	OC3SNGnh.18660_x_at	VHL			NM_198156.1	von Hippel-Lindau tumor suppressor	-0.14295
OC3SNGnh.13689_x_at	MIRN642	microRNA 642	-1.55694		OC3SNGnh.20028_x_at	VHL			NM_198156.1	von Hippel-Lindau tumor suppressor	-0.143683
OC3SNGnh.17336_x_at	MIRN559	microRNA 559			OCEM.436_x_at	VHL			NM_198156.1	von Hippel-Lindau tumor suppressor	-0.147572
OC3SNGnh.127_x_at	C1orf226	microRNA 556			OC3SNGnh.18660_x_at	VHL			NM_198156.1	von Hippel-Lindau tumor suppressor	-0.150943
OC3SNGnh.8532_x_at	MIRN187	microRNA 187			OCEM.436_at	VHL			NM_198156.1	von Hippel-Lindau tumor suppressor	-0.151838
OC3SNGnh.11550_at	MIRN29C	microRNA 29c		1.55	OC3SNGn.6984-474a_x_at	VHL			NM_198156.1	von Hippel-Lindau tumor suppressor	-0.155175
OCADNP.15201_s_at	MIRN661	microRNA 661		-1.86	OC3SNGn.3973-331a_s_at	VHL			NM_198156.1	von Hippel-Lindau tumor suppressor	-0.157621
OC3SNGnh.11550_at	MIRN29C	microRNA 29c		1.55	OC3SNGn.3973-331a_s_at	VHL			NM_198156.1	von Hippel-Lindau tumor suppressor	-0.157881
OCMX.12017.C1_at	MIRN146B	microRNA 146b			OCEM.436_x_at	VHL			NM_198156.1	von Hippel-Lindau tumor suppressor	-0.158583
OC3SNGnh.16267_at	MIRN497	microRNA 497		3.19	OCEM.436_at	VHL			NM_198156.1	von Hippel-Lindau tumor suppressor	-0.164212
OC3SNGnh.6176_x_at	MIRN101-1	microRNA 101-1	1.60869		OC3SNGn.3973-331a_s_at	VHL			NM_198156.1	von Hippel-Lindau tumor suppressor	-0.166536
OCEM.162_at	MIRN592	microRNA 592			OCEM.436_at	VHL			NM_198156.1	von Hippel-Lindau tumor suppressor	-0.171387
OCADNP.13786_s_at	MIRN301B	microRNA 301b	-1.50238		OC3P.7402.C2_x_at	VHL			NM_198156.1	von Hippel-Lindau tumor suppressor	-0.175681
OC3SNGnh.14117_at	MIRN557	microRNA 557			OC3P.7402.C2_x_at	VHL			NM_198156.1	von Hippel-Lindau tumor suppressor	-0.179004
OC3SNGnh.16168_x_at	MIRN576	microRNA 576		-1.54	OC3SNGn.6984-474a_x_at	VHL			NM_198156.1	von Hippel-Lindau tumor suppressor	-0.180606
OC3SNGnh.17053_at	GPR162	microRNA 200c		-1.55	OC3SNGn.6983-3a_s_at	VHL			NM_198156.1	von Hippel-Lindau tumor suppressor	-0.181264
OC3SNGnh.2107_x_at	MIRN552	microRNA 552	-1.61406		OC3P.5320.C1_s_at	VHL		1.54	NM_198156.1	von Hippel-Lindau tumor suppressor	-0.183198
OC3SNGnh.696_at	MIRN569	microRNA 569		1.92	OC3SNGnh.18660_x_at	VHL			NM_198156.1	von Hippel-Lindau tumor suppressor	-0.184036
OC3P.11403.C1_s_at	GPR162	microRNA 200c	-1.8663	-1.63	OC3SNGnh.20028_x_at	VHL			NM_198156.1	von Hippel-Lindau tumor suppressor	-0.184128
OCMX.3940.C1_at	MIRN625	microRNA 625		1.51	OCEM.436_x_at	VHL			NM_198156.1	von Hippel-Lindau tumor suppressor	-0.185132
OC3SNGnh.130_s_at	MIRN93	microRNA 93		1.64	OC3SNGn.3973-331a_s_at	VHL			NM_198156.1	von Hippel-Lindau tumor suppressor	-0.186384
OC3SNGnh.10216_x_at	MIRN548A2	microRNA 548a-2	-1.5706	2.12	OC3SNGn.3973-331a_s_at	VHL			NM_198156.1	von Hippel-Lindau tumor suppressor	-0.187686
OC3SNGnh.16713_at	MIRN613	microRNA 613	-2.29079		OC3P.7402.C1_s_at	VHL		-1.79	NM_198156.1	von Hippel-Lindau tumor suppressor	-0.18939
OCMXSNG.4688_x_at	MIRN564	microRNA 564			OCEM.436_at	VHL			NM_198156.1	von Hippel-Lindau tumor suppressor	-0.191752
OC3SNGnh.16592_x_at	MIRN425	microRNA 425			OC3SNGn.3973-331a_s_at	VHL			NM_198156.1	von Hippel-Lindau tumor suppressor	-0.192445
OCMX.3940.C1_at	MIRN625	microRNA 625		1.51	OC3P.7402.C1_s_at	VHL		-1.79	NM_198156.1	von Hippel-Lindau tumor suppressor	-0.198171
OCMX.3940.C1_at	MIRN625	microRNA 625		1.51	OC3SNGn.6983-3a_s_at	VHL			NM_198156.1	von Hippel-Lindau tumor suppressor	-0.199291
OC3SNGnh.130_s_at	MIRN93	microRNA 93		1.64	OCEM.436_at	VHL			NM_198156.1	von Hippel-Lindau tumor suppressor	-0.19931
OC3P.3864.C1_x_at	MIRN555	microRNA 555		1.56	OC3SNGn.3973-331a_s_at	VHL			NM_198156.1	von Hippel-Lindau tumor suppressor	-0.200712
OC3SNGnh.17094_at	MIRN611	microRNA 611		-1.55	OCEM.436_at	VHL			NM_198156.1	von Hippel-Lindau tumor suppressor	-0.204054
OC3SNGnh.16592_x_at	MIRN425	microRNA 425			OC3P.7402.C2_x_at	VHL			NM_198156.1	von Hippel-Lindau tumor suppressor	-0.207589
OC3SNGnh.14368_at	MIRN614	microRNA 614		-1.76	OC3SNGn.3973-331a_s_at	VHL			NM_198156.1	von Hippel-Lindau tumor suppressor	-0.211577
OC3P.3864.C1_at	MIRN555	microRNA 555		-1.5	OC3SNGn.3973-331a_s_at	VHL			NM_198156.1	von Hippel-Lindau tumor suppressor	-0.214512
OC3SNGnh.13689_x_at	MIRN642	microRNA 642	-1.55694		OC3P.7402.C2_x_at	VHL			NM_198156.1	von Hippel-Lindau tumor suppressor	-0.215256
OCMX.12930.C1_at	MIRN22	microRNA 22		1.66	OC3SNGnh.18660_x_at	VHL			NM_198156.1	von Hippel-Lindau tumor suppressor	-0.21968
OC3SNGnh.17336_x_at	MIRN559	microRNA 559			OC3SNGnh.18660_x_at	VHL			NM_198156.1	von Hippel-Lindau tumor suppressor	-0.224993
OC3SNGnh.16267_at	MIRN497	microRNA 497		3.19	OC3SNGnh.20028_x_at	VHL			NM_198156.1	von Hippel-Lindau tumor suppressor	-0.227181
OCMX.6961.C1_at	MIRN30E	microRNA 30e			OC3SNGnh.18660_x_at	VHL			NM_198156.1	von Hippel-Lindau tumor suppressor	-0.227508
OCMXSNG.1606_at	MIRN593	microRNA 593			OC3SNGn.3973-331a_s_at	VHL			NM_198156.1	von Hippel-Lindau tumor suppressor	-0.233214
OC3SNGnh.18430_at	MIRN566	microRNA 566	-1.63878	1.54	OC3P.7402.C2_x_at	VHL			NM_198156.1	von Hippel-Lindau tumor suppressor	-0.233527
OC3SNGnh.10216_x_at	MIRN548A2	microRNA 548a-2	-1.5706	2.12	OC3SNGn.6984-474a_x_at	VHL			NM_198156.1	von Hippel-Lindau tumor suppressor	-0.238041
OC3SNGnh.16713_at	MIRN613	microRNA 613	-2.29079		OC3SNGn.6983-3a_s_at	VHL			NM_198156.1	von Hippel-Lindau tumor suppressor	-0.238999
OC3SNGnh.130_s_at	MIRN93	microRNA 93		1.64	OC3P.7402.C2_x_at	VHL			NM_198156.1	von Hippel-Lindau tumor suppressor	-0.241071
OC3SNGnh.130_s_at	MIRN93	microRNA 93		1.64	OC3P.5320.C1_s_at	VHL		1.54	NM_198156.1	von Hippel-Lindau tumor suppressor	-0.24361
OC3SNGnh.17094_at	MIRN611	microRNA 611		-1.55	OC3SNGn.3973-331a_s_at	VHL			NM_198156.1	von Hippel-Lindau tumor suppressor	-0.250438
OC3P.3864.C1_x_at	MIRN555	microRNA 555		1.56	OCEM.436_x_at	VHL			NM_198156.1	von Hippel-Lindau tumor suppressor	-0.253871
OC3SNGnh.12857_x_at	MIRN600	microRNA 600			OC3SNGn.6983-3a_s_at	VHL			NM_198156.1	von Hippel-Lindau tumor suppressor	-0.259177
OC3SNGnh.16713_at	MIRN613	microRNA 613	-2.29079		OCEM.436_at	VHL			NM_198156.1	von Hippel-Lindau tumor suppressor	-0.262906
OC3SNGnh.8370_at	MIRN138-2	microRNA 138-2			OC3SNGn.3973-331a_s_at	VHL			NM_198156.1	von Hippel-Lindau tumor suppressor	-0.265826
OCADNP.15201_s_at	MIRN661	microRNA 661		-1.86	OCEM.436_at	VHL			NM_198156.1	von Hippel-Lindau tumor suppressor	-0.275189
OCADNP.13786_s_at	MIRN301B	microRNA 301b	-1.50238		OC3SNGnh.20028_x_at	VHL			NM_198156.1	von Hippel-Lindau tumor suppressor	-0.286194
OC3SNGnh.14368_at	MIRN614	microRNA 614		-1.76	OCEM.436_at	VHL			NM_198156.1	von Hippel-Lindau tumor suppressor	-0.292783
OC3P.12763.C1_at	MIRN151	microRNA 151			OC3SNGn.3973-331a_s_at	VHL			NM_198156.1	von Hippel-Lindau tumor suppressor	-0.292958
OC3P.12763.C1_x_at	MIRN151	microRNA 151		1.74	OC3SNGn.6983-3a_s_at	VHL			NM_198156.1	von Hippel-Lindau tumor suppressor	-0.295471
OC3P.11403.C1_s_at	GPR162	microRNA 200c	-1.8663	-1.63	OC3SNGn.6983-3a_s_at	VHL			NM_198156.1	von Hippel-Lindau tumor suppressor	-0.295722
OC3SNGnh.14831_at	MIRN582	microRNA 582		2.31	OC3P.7402.C1_s_at	VHL		-1.79	NM_198156.1	von Hippel-Lindau tumor suppressor	-0.306656
OC3SNGnh.13214_at	MIRN101-2	microRNA 101-2	1.95404	-1.79	OC3SNGn.3973-331a_s_at	VHL			NM_198156.1	von Hippel-Lindau tumor suppressor	-0.306924
OC3SNGnh.12857_x_at	MIRN600	microRNA 600			OCEM.436_x_at	VHL			NM_198156.1	von Hippel-Lindau tumor suppressor	-0.310239
OC3SNGnh.16168_x_at	MIRN576	microRNA 576		-1.54	OC3SNGnh.20028_x_at	VHL			NM_198156.1	von Hippel-Lindau tumor suppressor	-0.321212
OC3SNGnh.8263_at	MIRN449B	microRNA 449b			OC3SNGn.3973-331a_s_at	VHL			NM_198156.1	von Hippel-Lindau tumor suppressor	-0.322875
OC3P.11403.C1_s_at	GPR162	microRNA 200c	-1.8663	-1.63	OCEM.436_x_at	VHL			NM_198156.1	von Hippel-Lindau tumor suppressor	-0.323389
OC3SNGnh.16713_at	MIRN613	microRNA 613	-2.29079		OC3SNGnh.20028_x_at	VHL			NM_198156.1	von Hippel-Lindau tumor suppressor	-0.324205
OC3SNGnh.5421_at	MIRN561	microRNA 561	-2.17845		OC3P.5320.C1_s_at	VHL		1.54	NM_198156.1	von Hippel-Lindau tumor suppressor	-0.328025
OC3SNGnh.17336_x_at	MIRN559	microRNA 559			OC3SNGn.3973-331a_s_at	VHL			NM_198156.1	von Hippel-Lindau tumor suppressor	-0.328097
OC3SNGnh.14117_at	MIRN557	microRNA 557			OC3P.7402.C1_s_at	VHL		-1.79	NM_198156.1	von Hippel-Lindau tumor suppressor	-0.328462
OC3SNGnh.18430_at	MIRN566	microRNA 566	-1.63878	1.54	OC3SNGnh.20028_x_at	VHL			NM_198156.1	von Hippel-Lindau tumor suppressor	-0.330019
OC3SNGnh.10216_x_at	MIRN548A2	microRNA 548a-2	-1.5706	2.12	OC3P.7402.C2_x_at	VHL			NM_198156.1	von Hippel-Lindau tumor suppressor	-0.330249
OC3SNGnh.14831_at	MIRN582	microRNA 582		2.31	OC3P.5320.C1_s_at	VHL		1.54	NM_198156.1	von Hippel-Lindau tumor suppressor	-0.337891
OC3SNGnh.13337_x_at	MIRN7-3	microRNA 7-3	2.10284		OCEM.436_at	VHL			NM_198156.1	von Hippel-Lindau tumor suppressor	-0.339132
OC3SNGnh.8532_x_at	MIRN187	microRNA 187			OC3P.5320.C1_s_at	VHL		1.54	NM_198156.1	von Hippel-Lindau tumor suppressor	-0.340201
OC3SNGnh.16267_at	MIRN497	microRNA 497		3.19	OC3SNGn.6984-474a_x_at	VHL			NM_198156.1	von Hippel-Lindau tumor suppressor	-0.341308
OC3SNGnh.13689_x_at	MIRN642	microRNA 642	-1.55694		OC3SNGn.6984-474a_x_at	VHL			NM_198156.1	von Hippel-Lindau tumor suppressor	-0.344186
OCRS2.13103_s_at	MIRN124-3	microRNA 124-3			OC3SNGn.3973-331a_s_at	VHL			NM_198156.1	von Hippel-Lindau tumor suppressor	-0.352026
OCMX.2904.C1_x_at	MIRN548C	microRNA 548c			OC3SNGnh.18660_x_at	VHL			NM_198156.1	von Hippel-Lindau tumor suppressor	-0.3563
OC3SNGnh.5421_at	MIRN561	microRNA 561	-2.17845		OC3P.7402.C1_s_at	VHL		-1.79	NM_198156.1	von Hippel-Lindau tumor suppressor	-0.359596
OC3SNGnh.16267_at	MIRN497	microRNA 497		3.19	OC3P.5320.C1_s_at	VHL		1.54	NM_198156.1	von Hippel-Lindau tumor suppressor	-0.359682
OC3SNGnh.14117_at	MIRN557	microRNA 557			OCEM.436_x_at	VHL			NM_198156.1	von Hippel-Lindau tumor suppressor	-0.360938
OC3SNGnh.15682_x_at	MIRN199B	microRNA 199b	1.96522		OC3SNGnh.18660_x_at	VHL			NM_198156.1	von Hippel-Lindau tumor suppressor	-0.365142
OC3SNGnh.16168_x_at	MIRN576	microRNA 576		-1.54	OCEM.436_x_at	VHL			NM_198156.1	von Hippel-Lindau tumor suppressor	-0.367563
OCMX.6115.C1_x_at	MIRN301A	microRNA 301a		-1.6	OC3P.5320.C1_s_at	VHL		1.54	NM_198156.1	von Hippel-Lindau tumor suppressor	-0.371304
OC3SNGnh.10536_at	MIRN101-1	microRNA 101-1		1.63	OCEM.436_at	VHL			NM_198156.1	von Hippel-Lindau tumor suppressor	-0.371733
OCMX.6115.C1_x_at	MIRN301A	microRNA 301a		-1.6	OC3P.7402.C1_s_at	VHL		-1.79	NM_198156.1	von Hippel-Lindau tumor suppressor	-0.371778
OC3SNGnh.12857_x_at	MIRN600	microRNA 600			OC3SNGn.3973-331a_s_at	VHL			NM_198156.1	von Hippel-Lindau tumor suppressor	-0.383041
OC3SNGnh.5421_at	MIRN561	microRNA 561	-2.17845		OC3P.7402.C2_x_at	VHL			NM_198156.1	von Hippel-Lindau tumor suppressor	-0.386036
OC3SNGnh.2107_x_at	MIRN552	microRNA 552	-1.61406		OCEM.436_at	VHL			NM_198156.1	von Hippel-Lindau tumor suppressor	-0.38605
OCRS2.3174_at	MIRN661	microRNA 661		1.54	OC3SNGn.3973-331a_s_at	VHL			NM_198156.1	von Hippel-Lindau tumor suppressor	-0.386552
OC3SNGnh.8263_at	MIRN449B	microRNA 449b			OC3SNGnh.18660_x_at	VHL			NM_198156.1	von Hippel-Lindau tumor suppressor	-0.388646
OC3SNGnh.16168_x_at	MIRN576	microRNA 576		-1.54	OC3SNGn.6983-3a_s_at	VHL			NM_198156.1	von Hippel-Lindau tumor suppressor	-0.389331
OC3P.12763.C1_x_at	MIRN151	microRNA 151		1.74	OC3SNGn.3973-331a_s_at	VHL			NM_198156.1	von Hippel-Lindau tumor suppressor	-0.389893
OCADNP.13786_s_at	MIRN301B	microRNA 301b	-1.50238		OC3SNGn.6984-474a_x_at	VHL			NM_198156.1	von Hippel-Lindau tumor suppressor	-0.390102
OC3SNGnh.4795_x_at	MIRN573	microRNA 573			OC3SNGnh.18660_x_at	VHL			NM_198156.1	von Hippel-Lindau tumor suppressor	-0.392292
OC3SNGnh.18430_at	MIRN566	microRNA 566	-1.63878	1.54	OCEM.436_at	VHL			NM_198156.1	von Hippel-Lindau tumor suppressor	-0.393251
OC3SNGnh.16713_at	MIRN613	microRNA 613	-2.29079		OCEM.436_x_at	VHL			NM_198156.1	von Hippel-Lindau tumor suppressor	-0.394994
OC3SNGnh.2542_at	MIRN103-1	microRNA 103-1		1.94	OC3SNGn.3973-331a_s_at	VHL			NM_198156.1	von Hippel-Lindau tumor suppressor	-0.395083
OC3SNGnh.16713_at	MIRN613	microRNA 613	-2.29079		OC3P.7402.C2_x_at	VHL			NM_198156.1	von Hippel-Lindau tumor suppressor	-0.39555
OC3SNGnh.16713_at	MIRN613	microRNA 613	-2.29079		OC3SNGn.6984-474a_x_at	VHL			NM_198156.1	von Hippel-Lindau tumor suppressor	-0.401867
OCMX.3940.C1_at	MIRN625	microRNA 625		1.51	OC3P.7402.C2_x_at	VHL			NM_198156.1	von Hippel-Lindau tumor suppressor	-0.404907
OC3P.12763.C1_at	MIRN151	microRNA 151			OC3SNGn.6983-3a_s_at	VHL			NM_198156.1	von Hippel-Lindau tumor suppressor	-0.406485
OC3SNGnh.14831_at	MIRN582	microRNA 582		2.31	OC3SNGn.3973-331a_s_at	VHL			NM_198156.1	von Hippel-Lindau tumor suppressor	-0.414149
OC3SNGnh.2107_x_at	MIRN552	microRNA 552	-1.61406		OC3P.7402.C1_s_at	VHL		-1.79	NM_198156.1	von Hippel-Lindau tumor suppressor	-0.414288
OC3SNGnh.14117_at	MIRN557	microRNA 557			OCEM.436_at	VHL			NM_198156.1	von Hippel-Lindau tumor suppressor	-0.416705
OC3SNGnh.14117_at	MIRN557	microRNA 557			OC3SNGn.3973-331a_s_at	VHL			NM_198156.1	von Hippel-Lindau tumor suppressor	-0.418814
OC3SNGnh.2107_x_at	MIRN552	microRNA 552	-1.61406		OC3SNGn.6984-474a_x_at	VHL			NM_198156.1	von Hippel-Lindau tumor suppressor	-0.420731
OCADNP.1035_s_at	MIRN659	microRNA 659		-1.54	OCEM.436_at	VHL			NM_198156.1	von Hippel-Lindau tumor suppressor	-0.43557
OC3SNGnh.17053_at	GPR162	microRNA 200c		-1.55	OC3SNGn.3973-331a_s_at	VHL			NM_198156.1	von Hippel-Lindau tumor suppressor	-0.435931
OC3SNGnh.6784_at	MIRN33A	microRNA 33a		1.52	OC3SNGn.3973-331a_s_at	VHL			NM_198156.1	von Hippel-Lindau tumor suppressor	-0.436721
OC3SNGnh.5421_at	MIRN561	microRNA 561	-2.17845		OC3SNGn.6984-474a_x_at	VHL			NM_198156.1	von Hippel-Lindau tumor suppressor	-0.443517
OCMX.6115.C1_x_at	MIRN301A	microRNA 301a		-1.6	OC3SNGn.6983-3a_s_at	VHL			NM_198156.1	von Hippel-Lindau tumor suppressor	-0.444792
OC3SNGnh.16267_at	MIRN497	microRNA 497		3.19	OC3P.7402.C1_s_at	VHL		-1.79	NM_198156.1	von Hippel-Lindau tumor suppressor	-0.446309
OCMX.12930.C1_at	MIRN22	microRNA 22		1.66	OCEM.436_at	VHL			NM_198156.1	von Hippel-Lindau tumor suppressor	-0.457764
OC3SNGnh.5421_at	MIRN561	microRNA 561	-2.17845		OC3SNGn.6983-3a_s_at	VHL			NM_198156.1	von Hippel-Lindau tumor suppressor	-0.458821
OCRS2.13103_s_at	MIRN124-3	microRNA 124-3			OCEM.436_at	VHL			NM_198156.1	von Hippel-Lindau tumor suppressor	-0.461571
OC3SNGnh.14831_at	MIRN582	microRNA 582		2.31	OC3SNGnh.20028_x_at	VHL			NM_198156.1	von Hippel-Lindau tumor suppressor	-0.465159
OC3SNGnh.2107_x_at	MIRN552	microRNA 552	-1.61406		OC3SNGnh.20028_x_at	VHL			NM_198156.1	von Hippel-Lindau tumor suppressor	-0.470031
OC3SNGnh.13689_x_at	MIRN642	microRNA 642	-1.55694		OCEM.436_at	VHL			NM_198156.1	von Hippel-Lindau tumor suppressor	-0.476523
OC3SNGnh.127_x_at	C1orf226	microRNA 556			OCEM.436_at	VHL			NM_198156.1	von Hippel-Lindau tumor suppressor	-0.484713
OCMX.3940.C1_at	MIRN625	microRNA 625		1.51	OC3SNGn.3973-331a_s_at	VHL			NM_198156.1	von Hippel-Lindau tumor suppressor	-0.486913
OCMX.12017.C1_at	MIRN146B	microRNA 146b			OCEM.436_at	VHL			NM_198156.1	von Hippel-Lindau tumor suppressor	-0.496615
OC3SNGnh.130_s_at	MIRN93	microRNA 93		1.64	OC3P.7402.C1_s_at	VHL		-1.79	NM_198156.1	von Hippel-Lindau tumor suppressor	-0.498386
OC3SNGnh.7187_at	MIRN554	microRNA 554		1.76	OC3SNGn.3973-331a_s_at	VHL			NM_198156.1	von Hippel-Lindau tumor suppressor	-0.509178
OC3SNGnh.2107_x_at	MIRN552	microRNA 552	-1.61406		OC3P.7402.C2_x_at	VHL			NM_198156.1	von Hippel-Lindau tumor suppressor	-0.514534
OC3SNGnh.6784_at	MIRN33A	microRNA 33a		1.52	OCEM.436_at	VHL			NM_198156.1	von Hippel-Lindau tumor suppressor	-0.516726
OCMX.12017.C1_at	MIRN146B	microRNA 146b			OC3SNGn.3973-331a_s_at	VHL			NM_198156.1	von Hippel-Lindau tumor suppressor	-0.52248
OC3SNGnh.14375_x_at	MIRN181B2	microRNA 181b-2		-1.58	OC3P.5320.C1_s_at	VHL		1.54	NM_198156.1	von Hippel-Lindau tumor suppressor	-0.525341
OCRS2.2867_s_at	MIRN198	microRNA 198		1.6	OC3SNGn.3973-331a_s_at	VHL			NM_198156.1	von Hippel-Lindau tumor suppressor	-0.530772
OC3SNGnh.10536_at	MIRN101-1	microRNA 101-1		1.63	OC3SNGn.3973-331a_s_at	VHL			NM_198156.1	von Hippel-Lindau tumor suppressor	-0.536794
OC3SNGnh.130_s_at	MIRN93	microRNA 93		1.64	OCEM.436_x_at	VHL			NM_198156.1	von Hippel-Lindau tumor suppressor	-0.537439
OC3SNGnh.8532_x_at	MIRN187	microRNA 187			OC3P.7402.C1_s_at	VHL		-1.79	NM_198156.1	von Hippel-Lindau tumor suppressor	-0.549524
OC3SNGnh.5421_at	MIRN561	microRNA 561	-2.17845		OC3SNGnh.20028_x_at	VHL			NM_198156.1	von Hippel-Lindau tumor suppressor	-0.553482
OC3SNGnh.18430_at	MIRN566	microRNA 566	-1.63878	1.54	OC3SNGn.6984-474a_x_at	VHL			NM_198156.1	von Hippel-Lindau tumor suppressor	-0.554399
OC3SNGnh.5421_at	MIRN561	microRNA 561	-2.17845		OCEM.436_x_at	VHL			NM_198156.1	von Hippel-Lindau tumor suppressor	-0.555387
OC3SNGnh.16267_at	MIRN497	microRNA 497		3.19	OC3P.7402.C2_x_at	VHL			NM_198156.1	von Hippel-Lindau tumor suppressor	-0.557717
OC3SNGnh.16061_x_at	MIRN604	microRNA 604			OC3SNGn.3973-331a_s_at	VHL			NM_198156.1	von Hippel-Lindau tumor suppressor	-0.562235
OC3SNGnh.331_at	MIRN597	microRNA 597			OC3SNGn.3973-331a_s_at	VHL			NM_198156.1	von Hippel-Lindau tumor suppressor	-0.567042
OCRS2.3174_at	MIRN661	microRNA 661		1.54	OCEM.436_at	VHL			NM_198156.1	von Hippel-Lindau tumor suppressor	-0.571861
OC3SNGnh.16267_at	MIRN497	microRNA 497		3.19	OC3SNGn.3973-331a_s_at	VHL			NM_198156.1	von Hippel-Lindau tumor suppressor	-0.578351
OCMX.6961.C1_at	MIRN30E	microRNA 30e			OCEM.436_at	VHL			NM_198156.1	von Hippel-Lindau tumor suppressor	-0.578721
OC3SNGnh.15682_x_at	MIRN199B	microRNA 199b	1.96522		OCEM.436_at	VHL			NM_198156.1	von Hippel-Lindau tumor suppressor	-0.579316
OC3SNGnh.2107_x_at	MIRN552	microRNA 552	-1.61406		OCEM.436_x_at	VHL			NM_198156.1	von Hippel-Lindau tumor suppressor	-0.579461
OCUTR.226_x_at	MIRN301B	microRNA 301b		1.55	OC3SNGn.3973-331a_s_at	VHL			NM_198156.1	von Hippel-Lindau tumor suppressor	-0.597334
OC3P.13017.C1_x_at	MIRN181D	microRNA 181d		1.51	OC3SNGn.3973-331a_s_at	VHL			NM_198156.1	von Hippel-Lindau tumor suppressor	-0.598491
OC3SNGnh.5613_x_at	GPR162	microRNA 200c		2.05	OC3SNGn.3973-331a_s_at	VHL			NM_198156.1	von Hippel-Lindau tumor suppressor	-0.603118
OCMXSNG.4409_at	MIRN7-1	microRNA 7-1		1.78	OC3SNGn.3973-331a_s_at	VHL			NM_198156.1	von Hippel-Lindau tumor suppressor	-0.60981
OC3SNGnh.7186_x_at	MIRN628	microRNA 628		1.55	OC3SNGn.3973-331a_s_at	VHL			NM_198156.1	von Hippel-Lindau tumor suppressor	-0.610342
OCMXSNG.1606_at	MIRN593	microRNA 593			OCEM.436_at	VHL			NM_198156.1	von Hippel-Lindau tumor suppressor	-0.625585
OC3SNGnh.13337_x_at	MIRN7-3	microRNA 7-3	2.10284		OC3SNGnh.18660_x_at	VHL			NM_198156.1	von Hippel-Lindau tumor suppressor	-0.632025
OC3SNGnh.14375_x_at	MIRN181B2	microRNA 181b-2		-1.58	OC3SNGn.6983-3a_s_at	VHL			NM_198156.1	von Hippel-Lindau tumor suppressor	-0.632217
OC3SNGnh.4795_x_at	MIRN573	microRNA 573			OCEM.436_at	VHL			NM_198156.1	von Hippel-Lindau tumor suppressor	-0.634363
OC3SNGnh.8192_at	MIRN581	microRNA 581		1.53	OCEM.436_at	VHL			NM_198156.1	von Hippel-Lindau tumor suppressor	-0.636752
OC3SNGnh.8370_at	MIRN138-2	microRNA 138-2			OCEM.436_at	VHL			NM_198156.1	von Hippel-Lindau tumor suppressor	-0.638501
OC3SNGnh.2107_x_at	MIRN552	microRNA 552	-1.61406		OC3SNGn.6983-3a_s_at	VHL			NM_198156.1	von Hippel-Lindau tumor suppressor	-0.640425
OC3SNGnh.14375_x_at	MIRN181B2	microRNA 181b-2		-1.58	OC3P.7402.C1_s_at	VHL		-1.79	NM_198156.1	von Hippel-Lindau tumor suppressor	-0.643994
OC3SNGnh.14831_at	MIRN582	microRNA 582		2.31	OC3P.7402.C2_x_at	VHL			NM_198156.1	von Hippel-Lindau tumor suppressor	-0.647776
OC3SNGnh.4055_at	MIRN103-2	microRNA 103-2		2.04	OC3SNGn.3973-331a_s_at	VHL			NM_198156.1	von Hippel-Lindau tumor suppressor	-0.657291
OC3SNGnh.2220_at	MIRN149	microRNA 149		1.75	OC3SNGn.3973-331a_s_at	VHL			NM_198156.1	von Hippel-Lindau tumor suppressor	-0.659913
OCRS2.5576_x_at	MIRN324	microRNA 324			OC3SNGn.3973-331a_s_at	VHL			NM_198156.1	von Hippel-Lindau tumor suppressor	-0.676125
OCRS2.11871_at	MIRN633	microRNA 633		1.61	OC3SNGn.3973-331a_s_at	VHL			NM_198156.1	von Hippel-Lindau tumor suppressor	-0.678869
OCRS2.551_x_at	MIRN129-1	microRNA 129-1			OC3SNGn.3973-331a_s_at	VHL			NM_198156.1	von Hippel-Lindau tumor suppressor	-0.680749
OC3SNGnh.14831_at	MIRN582	microRNA 582		2.31	OC3SNGn.6984-474a_x_at	VHL			NM_198156.1	von Hippel-Lindau tumor suppressor	-0.683078
OCMX.2904.C1_x_at	MIRN548C	microRNA 548c			OCEM.436_at	VHL			NM_198156.1	von Hippel-Lindau tumor suppressor	-0.687466
OCRS2.551_x_at	MIRN129-1	microRNA 129-1			OCEM.436_at	VHL			NM_198156.1	von Hippel-Lindau tumor suppressor	-0.704683
OCMX.12930.C1_at	MIRN22	microRNA 22		1.66	OC3SNGn.3973-331a_s_at	VHL			NM_198156.1	von Hippel-Lindau tumor suppressor	-0.716135
OCMX.8490.C1_at	MIRN139	microRNA 139		1.55	OC3SNGn.3973-331a_s_at	VHL			NM_198156.1	von Hippel-Lindau tumor suppressor	-0.721666
OC3SNGnh.8532_x_at	MIRN187	microRNA 187			OC3SNGn.6983-3a_s_at	VHL			NM_198156.1	von Hippel-Lindau tumor suppressor	-0.724873
OC3SNGnh.7187_at	MIRN554	microRNA 554		1.76	OCEM.436_at	VHL			NM_198156.1	von Hippel-Lindau tumor suppressor	-0.725831
OC3SNGnh.696_at	MIRN569	microRNA 569		1.92	OCEM.436_at	VHL			NM_198156.1	von Hippel-Lindau tumor suppressor	-0.730979
OC3SNGnh.14831_at	MIRN582	microRNA 582		2.31	OC3SNGnh.18660_x_at	VHL			NM_198156.1	von Hippel-Lindau tumor suppressor	-0.738655
OCMX.2899.C1_at	MIRN210	microRNA 210		1.76	OCEM.436_at	VHL			NM_198156.1	von Hippel-Lindau tumor suppressor	-0.739686
OC3P.3864.C1_x_at	MIRN555	microRNA 555		1.56	OCEM.436_at	VHL			NM_198156.1	von Hippel-Lindau tumor suppressor	-0.740573
OC3SNGnh.17053_at	GPR162	microRNA 200c		-1.55	OCEM.436_at	VHL			NM_198156.1	von Hippel-Lindau tumor suppressor	-0.742055
OC3SNGnh.14547_x_at	MIRN345	microRNA 345			OC3SNGn.3973-331a_s_at	VHL			NM_198156.1	von Hippel-Lindau tumor suppressor	-0.743819
OC3SNGnh.16267_at	MIRN497	microRNA 497		3.19	OC3SNGnh.18660_x_at	VHL			NM_198156.1	von Hippel-Lindau tumor suppressor	-0.745829
OC3SNGnh.4055_at	MIRN103-2	microRNA 103-2		2.04	OCEM.436_at	VHL			NM_198156.1	von Hippel-Lindau tumor suppressor	-0.749317
OCMX.8490.C1_at	MIRN139	microRNA 139		1.55	OCEM.436_at	VHL			NM_198156.1	von Hippel-Lindau tumor suppressor	-0.757045
OC3SNGnh.14278_at	MIRN339	microRNA 339		1.64	OCEM.436_at	VHL			NM_198156.1	von Hippel-Lindau tumor suppressor	-0.75821
OCMX.2899.C1_at	MIRN210	microRNA 210		1.76	OC3SNGn.3973-331a_s_at	VHL			NM_198156.1	von Hippel-Lindau tumor suppressor	-0.763125
OC3P.2409.C1_s_at	MIRN21	microRNA 21		1.86	OC3SNGn.3973-331a_s_at	VHL			NM_198156.1	von Hippel-Lindau tumor suppressor	-0.772848
OC3SNGnh.11550_at	MIRN29C	microRNA 29c		1.55	OCEM.436_at	VHL			NM_198156.1	von Hippel-Lindau tumor suppressor	-0.776781
OCMX.6115.C1_x_at	MIRN301A	microRNA 301a		-1.6	OCEM.436_x_at	VHL			NM_198156.1	von Hippel-Lindau tumor suppressor	-0.777206
OC3SNGnh.14278_at	MIRN339	microRNA 339		1.64	OC3SNGn.3973-331a_s_at	VHL			NM_198156.1	von Hippel-Lindau tumor suppressor	-0.795468
OCUTR.226_x_at	MIRN301B	microRNA 301b		1.55	OCEM.436_at	VHL			NM_198156.1	von Hippel-Lindau tumor suppressor	-0.797925
OC3SNGnh.127_x_at	C1orf226	microRNA 556			OC3SNGn.3973-331a_s_at	VHL			NM_198156.1	von Hippel-Lindau tumor suppressor	-0.802898
OC3SNGnh.8532_x_at	MIRN187	microRNA 187			OCEM.436_x_at	VHL			NM_198156.1	von Hippel-Lindau tumor suppressor	-0.804277
OC3SNGnh.5613_x_at	GPR162	microRNA 200c		2.05	OCEM.436_at	VHL			NM_198156.1	von Hippel-Lindau tumor suppressor	-0.804838
OC3SNGnh.16592_x_at	MIRN425	microRNA 425			OCEM.436_at	VHL			NM_198156.1	von Hippel-Lindau tumor suppressor	-0.81654
OCRS2.5520_s_at	MIRN659	microRNA 659			OC3SNGn.3973-331a_s_at	VHL			NM_198156.1	von Hippel-Lindau tumor suppressor	-0.822934
OC3P.12763.C1_at	MIRN151	microRNA 151			OCEM.436_at	VHL			NM_198156.1	von Hippel-Lindau tumor suppressor	-0.825547
OC3SNGnh.8192_at	MIRN581	microRNA 581		1.53	OC3SNGn.3973-331a_s_at	VHL			NM_198156.1	von Hippel-Lindau tumor suppressor	-0.83023
OC3SNGnh.14375_x_at	MIRN181B2	microRNA 181b-2		-1.58	OCEM.436_x_at	VHL			NM_198156.1	von Hippel-Lindau tumor suppressor	-0.834589
OC3SNGnh.696_at	MIRN569	microRNA 569		1.92	OC3SNGn.3973-331a_s_at	VHL			NM_198156.1	von Hippel-Lindau tumor suppressor	-0.835056
OCRS2.5520_s_at	MIRN659	microRNA 659			OCEM.436_at	VHL			NM_198156.1	von Hippel-Lindau tumor suppressor	-0.84283
OCMX.3940.C1_at	MIRN625	microRNA 625		1.51	OCEM.436_at	VHL			NM_198156.1	von Hippel-Lindau tumor suppressor	-0.843168
OC3SNGnh.14547_x_at	MIRN345	microRNA 345			OCEM.436_at	VHL			NM_198156.1	von Hippel-Lindau tumor suppressor	-0.843356
OC3SNGnh.2542_at	MIRN103-1	microRNA 103-1		1.94	OCEM.436_at	VHL			NM_198156.1	von Hippel-Lindau tumor suppressor	-0.85521
OC3SNGnh.16061_x_at	MIRN604	microRNA 604			OCEM.436_at	VHL			NM_198156.1	von Hippel-Lindau tumor suppressor	-0.882612
OC3SNGnh.15682_x_at	MIRN199B	microRNA 199b	1.96522		OC3SNGn.3973-331a_s_at	VHL			NM_198156.1	von Hippel-Lindau tumor suppressor	-0.883183
OCMX.6961.C1_at	MIRN30E	microRNA 30e			OC3SNGn.3973-331a_s_at	VHL			NM_198156.1	von Hippel-Lindau tumor suppressor	-0.898324
OC3P.13017.C1_x_at	MIRN181D	microRNA 181d		1.51	OCEM.436_at	VHL			NM_198156.1	von Hippel-Lindau tumor suppressor	-0.901456
OCRS2.5576_x_at	MIRN324	microRNA 324			OCEM.436_at	VHL			NM_198156.1	von Hippel-Lindau tumor suppressor	-0.9021
OC3P.12763.C1_x_at	MIRN151	microRNA 151		1.74	OCEM.436_at	VHL			NM_198156.1	von Hippel-Lindau tumor suppressor	-0.907827
OCRS2.11871_at	MIRN633	microRNA 633		1.61	OCEM.436_at	VHL			NM_198156.1	von Hippel-Lindau tumor suppressor	-0.914614
OCMXSNG.4409_at	MIRN7-1	microRNA 7-1		1.78	OCEM.436_at	VHL			NM_198156.1	von Hippel-Lindau tumor suppressor	-0.92536
OCRS2.2867_s_at	MIRN198	microRNA 198		1.6	OCEM.436_at	VHL			NM_198156.1	von Hippel-Lindau tumor suppressor	-0.925526
OC3SNGnh.2220_at	MIRN149	microRNA 149		1.75	OCEM.436_at	VHL			NM_198156.1	von Hippel-Lindau tumor suppressor	-0.925768
OC3SNGnh.12857_x_at	MIRN600	microRNA 600			OCEM.436_at	VHL			NM_198156.1	von Hippel-Lindau tumor suppressor	-0.930632
OCMX.2904.C1_x_at	MIRN548C	microRNA 548c			OC3SNGn.3973-331a_s_at	VHL			NM_198156.1	von Hippel-Lindau tumor suppressor	-0.939465
OC3SNGnh.13337_x_at	MIRN7-3	microRNA 7-3	2.10284		OC3SNGn.3973-331a_s_at	VHL			NM_198156.1	von Hippel-Lindau tumor suppressor	-0.944201
OC3P.2409.C1_s_at	MIRN21	microRNA 21		1.86	OCEM.436_at	VHL			NM_198156.1	von Hippel-Lindau tumor suppressor	-0.952975
OC3SNGnh.331_at	MIRN597	microRNA 597			OCEM.436_at	VHL			NM_198156.1	von Hippel-Lindau tumor suppressor	-0.954581
OC3SNGnh.7186_x_at	MIRN628	microRNA 628		1.55	OCEM.436_at	VHL			NM_198156.1	von Hippel-Lindau tumor suppressor	-0.956065
OC3SNGnh.4795_x_at	MIRN573	microRNA 573			OC3SNGn.3973-331a_s_at	VHL			NM_198156.1	von Hippel-Lindau tumor suppressor	-0.960816
OC3P.3864.C1_at	MIRN555	microRNA 555		-1.5	OC3SNGnh.5090_x_at	TPM1	1.61775	-1.63	NM_001018005.1	tropomyosin 1 (alpha)	0.863535
OC3SNGnh.10536_at	MIRN101-1	microRNA 101-1		1.63	OC3SNGnh.5090_x_at	TPM1	1.61775	-1.63	NM_001018005.1	tropomyosin 1 (alpha)	0.833416
OC3SNGnh.14368_at	MIRN614	microRNA 614		-1.76	OC3SNGnh.5090_x_at	TPM1	1.61775	-1.63	NM_001018005.1	tropomyosin 1 (alpha)	0.820126
OCADNP.15201_s_at	MIRN661	microRNA 661		-1.86	OC3SNGnh.5090_x_at	TPM1	1.61775	-1.63	NM_001018005.1	tropomyosin 1 (alpha)	0.803239
OC3SNGnh.17094_at	MIRN611	microRNA 611		-1.55	OC3SNGnh.5090_x_at	TPM1	1.61775	-1.63	NM_001018005.1	tropomyosin 1 (alpha)	0.790943
OCRS2.551_x_at	MIRN129-1	microRNA 129-1			OC3SNGnh.5090_x_at	TPM1	1.61775	-1.63	NM_001018005.1	tropomyosin 1 (alpha)	0.769635
OC3SNGnh.14278_at	MIRN339	microRNA 339		1.64	OC3SNGnh.5090_x_at	TPM1	1.61775	-1.63	NM_001018005.1	tropomyosin 1 (alpha)	0.758096
OC3SNGnh.13214_at	MIRN101-2	microRNA 101-2	1.95404	-1.79	OC3SNGnh.5090_x_at	TPM1	1.61775	-1.63	NM_001018005.1	tropomyosin 1 (alpha)	0.756113
OC3SNGnh.127_x_at	C1orf226	microRNA 556			OC3SNGnh.5090_x_at	TPM1	1.61775	-1.63	NM_001018005.1	tropomyosin 1 (alpha)	0.754295
OC3SNGnh.7187_at	MIRN554	microRNA 554		1.76	OC3SNGnh.5090_x_at	TPM1	1.61775	-1.63	NM_001018005.1	tropomyosin 1 (alpha)	0.751999
OC3SNGnh.8263_at	MIRN449B	microRNA 449b			OC3SNGnh.5090_x_at	TPM1	1.61775	-1.63	NM_001018005.1	tropomyosin 1 (alpha)	0.732999
OC3SNGnh.8192_at	MIRN581	microRNA 581		1.53	OC3SNGnh.5090_x_at	TPM1	1.61775	-1.63	NM_001018005.1	tropomyosin 1 (alpha)	0.718701
OCMX.8490.C1_at	MIRN139	microRNA 139		1.55	OC3SNGnh.5090_x_at	TPM1	1.61775	-1.63	NM_001018005.1	tropomyosin 1 (alpha)	0.713228
OC3SNGnh.5613_x_at	GPR162	microRNA 200c		2.05	OC3SNGnh.5090_x_at	TPM1	1.61775	-1.63	NM_001018005.1	tropomyosin 1 (alpha)	0.702683
OCUTR.226_x_at	MIRN301B	microRNA 301b		1.55	OC3SNGnh.5090_x_at	TPM1	1.61775	-1.63	NM_001018005.1	tropomyosin 1 (alpha)	0.66573
OCADNP.18636_s_at	MIRN572	microRNA 572			OC3SNGnh.5090_x_at	TPM1	1.61775	-1.63	NM_001018005.1	tropomyosin 1 (alpha)	0.659373
OCADNP.1035_s_at	MIRN659	microRNA 659		-1.54	OC3SNGnh.5090_x_at	TPM1	1.61775	-1.63	NM_001018005.1	tropomyosin 1 (alpha)	0.656248
OCMX.6961.C1_at	MIRN30E	microRNA 30e			OC3SNGnh.5090_x_at	TPM1	1.61775	-1.63	NM_001018005.1	tropomyosin 1 (alpha)	0.642809
OC3SNGnh.13337_x_at	MIRN7-3	microRNA 7-3	2.10284		OC3SNGnh.5090_x_at	TPM1	1.61775	-1.63	NM_001018005.1	tropomyosin 1 (alpha)	0.632416
OCRS2.13103_s_at	MIRN124-3	microRNA 124-3			OC3SNGnh.5090_x_at	TPM1	1.61775	-1.63	NM_001018005.1	tropomyosin 1 (alpha)	0.631884
OC3SNGnh.6176_x_at	MIRN101-1	microRNA 101-1	1.60869		OC3SNGnh.5090_x_at	TPM1	1.61775	-1.63	NM_001018005.1	tropomyosin 1 (alpha)	0.628596
OCMX.2899.C1_at	MIRN210	microRNA 210		1.76	OC3SNGnh.5090_x_at	TPM1	1.61775	-1.63	NM_001018005.1	tropomyosin 1 (alpha)	0.625266
OCRS2.3174_at	MIRN661	microRNA 661		1.54	OC3SNGnh.5090_x_at	TPM1	1.61775	-1.63	NM_001018005.1	tropomyosin 1 (alpha)	0.623359
OCRS2.5520_s_at	MIRN659	microRNA 659			OC3SNGnh.5090_x_at	TPM1	1.61775	-1.63	NM_001018005.1	tropomyosin 1 (alpha)	0.600773
OCMX.12930.C1_at	MIRN22	microRNA 22		1.66	OC3SNGnh.5090_x_at	TPM1	1.61775	-1.63	NM_001018005.1	tropomyosin 1 (alpha)	0.596269
OC3SNGnh.6784_at	MIRN33A	microRNA 33a		1.52	OC3SNGnh.5090_x_at	TPM1	1.61775	-1.63	NM_001018005.1	tropomyosin 1 (alpha)	0.576949
OC3SNGnh.8370_at	MIRN138-2	microRNA 138-2			OC3SNGnh.5090_x_at	TPM1	1.61775	-1.63	NM_001018005.1	tropomyosin 1 (alpha)	0.558294
OC3SNGnh.16061_x_at	MIRN604	microRNA 604			OC3SNGnh.5090_x_at	TPM1	1.61775	-1.63	NM_001018005.1	tropomyosin 1 (alpha)	0.53461
OCMX.2904.C1_x_at	MIRN548C	microRNA 548c			OC3SNGnh.5090_x_at	TPM1	1.61775	-1.63	NM_001018005.1	tropomyosin 1 (alpha)	0.530312
OCMXSNG.1606_at	MIRN593	microRNA 593			OC3SNGnh.5090_x_at	TPM1	1.61775	-1.63	NM_001018005.1	tropomyosin 1 (alpha)	0.514067
OCRS2.11871_at	MIRN633	microRNA 633		1.61	OC3SNGnh.5090_x_at	TPM1	1.61775	-1.63	NM_001018005.1	tropomyosin 1 (alpha)	0.490379
OC3SNGnh.2542_at	MIRN103-1	microRNA 103-1		1.94	OC3SNGnh.5090_x_at	TPM1	1.61775	-1.63	NM_001018005.1	tropomyosin 1 (alpha)	0.468005
OC3SNGnh.17053_at	GPR162	microRNA 200c		-1.55	OC3SNGnh.5090_x_at	TPM1	1.61775	-1.63	NM_001018005.1	tropomyosin 1 (alpha)	0.444552
OC3SNGnh.4795_x_at	MIRN573	microRNA 573			OC3SNGnh.5090_x_at	TPM1	1.61775	-1.63	NM_001018005.1	tropomyosin 1 (alpha)	0.442327
OC3P.13017.C1_x_at	MIRN181D	microRNA 181d		1.51	OC3SNGnh.5090_x_at	TPM1	1.61775	-1.63	NM_001018005.1	tropomyosin 1 (alpha)	0.426721
OCEM.162_at	MIRN592	microRNA 592			OC3SNGnh.5090_x_at	TPM1	1.61775	-1.63	NM_001018005.1	tropomyosin 1 (alpha)	0.417841
OC3SNGnh.14547_x_at	MIRN345	microRNA 345			OC3SNGnh.5090_x_at	TPM1	1.61775	-1.63	NM_001018005.1	tropomyosin 1 (alpha)	0.416953
OC3SNGnh.15682_x_at	MIRN199B	microRNA 199b	1.96522		OC3SNGnh.5090_x_at	TPM1	1.61775	-1.63	NM_001018005.1	tropomyosin 1 (alpha)	0.415305
OC3SNGnh.331_at	MIRN597	microRNA 597			OC3SNGnh.5090_x_at	TPM1	1.61775	-1.63	NM_001018005.1	tropomyosin 1 (alpha)	0.398099
OCRS2.2867_s_at	MIRN198	microRNA 198		1.6	OC3SNGnh.5090_x_at	TPM1	1.61775	-1.63	NM_001018005.1	tropomyosin 1 (alpha)	0.371129
OC3SNGnh.4055_at	MIRN103-2	microRNA 103-2		2.04	OC3SNGnh.5090_x_at	TPM1	1.61775	-1.63	NM_001018005.1	tropomyosin 1 (alpha)	0.362199
OCMXSNG.4688_x_at	MIRN564	microRNA 564			OC3SNGnh.5090_x_at	TPM1	1.61775	-1.63	NM_001018005.1	tropomyosin 1 (alpha)	0.338639
OC3SNGnh.7186_x_at	MIRN628	microRNA 628		1.55	OC3SNGnh.5090_x_at	TPM1	1.61775	-1.63	NM_001018005.1	tropomyosin 1 (alpha)	0.33058
OC3SNGnh.696_at	MIRN569	microRNA 569		1.92	OC3SNGnh.5090_x_at	TPM1	1.61775	-1.63	NM_001018005.1	tropomyosin 1 (alpha)	0.321011
OCMXSNG.4409_at	MIRN7-1	microRNA 7-1		1.78	OC3SNGnh.5090_x_at	TPM1	1.61775	-1.63	NM_001018005.1	tropomyosin 1 (alpha)	0.313105
OC3SNGnh.2220_at	MIRN149	microRNA 149		1.75	OC3SNGnh.5090_x_at	TPM1	1.61775	-1.63	NM_001018005.1	tropomyosin 1 (alpha)	0.282637
OCRS2.5576_x_at	MIRN324	microRNA 324			OC3SNGnh.5090_x_at	TPM1	1.61775	-1.63	NM_001018005.1	tropomyosin 1 (alpha)	0.249881
OC3SNGnh.17336_x_at	MIRN559	microRNA 559			OC3SNGnh.5090_x_at	TPM1	1.61775	-1.63	NM_001018005.1	tropomyosin 1 (alpha)	0.2426
OC3P.2409.C1_s_at	MIRN21	microRNA 21		1.86	OC3SNGnh.5090_x_at	TPM1	1.61775	-1.63	NM_001018005.1	tropomyosin 1 (alpha)	0.241497
OC3P.3864.C1_x_at	MIRN555	microRNA 555		1.56	OC3SNGnh.5090_x_at	TPM1	1.61775	-1.63	NM_001018005.1	tropomyosin 1 (alpha)	0.113637
OC3SNGnh.18430_at	MIRN566	microRNA 566	-1.63878	1.54	OC3SNGnh.5090_x_at	TPM1	1.61775	-1.63	NM_001018005.1	tropomyosin 1 (alpha)	0.0981069
OC3SNGnh.10216_x_at	MIRN548A2	microRNA 548a-2	-1.5706	2.12	OC3SNGnh.5090_x_at	TPM1	1.61775	-1.63	NM_001018005.1	tropomyosin 1 (alpha)	0.0822296
OC3SNGnh.12857_x_at	MIRN600	microRNA 600			OC3SNGnh.5090_x_at	TPM1	1.61775	-1.63	NM_001018005.1	tropomyosin 1 (alpha)	0.0732015
OC3SNGnh.11550_at	MIRN29C	microRNA 29c		1.55	OC3SNGnh.5090_x_at	TPM1	1.61775	-1.63	NM_001018005.1	tropomyosin 1 (alpha)	0.0721452
OCMX.12017.C1_at	MIRN146B	microRNA 146b			OC3SNGnh.5090_x_at	TPM1	1.61775	-1.63	NM_001018005.1	tropomyosin 1 (alpha)	0.0107513
OC3P.12763.C1_at	MIRN151	microRNA 151			OC3SNGnh.5090_x_at	TPM1	1.61775	-1.63	NM_001018005.1	tropomyosin 1 (alpha)	0.00386942
OC3P.12763.C1_x_at	MIRN151	microRNA 151		1.74	OC3SNGnh.5090_x_at	TPM1	1.61775	-1.63	NM_001018005.1	tropomyosin 1 (alpha)	-0.00808769
OC3SNGnh.16592_x_at	MIRN425	microRNA 425			OC3SNGnh.5090_x_at	TPM1	1.61775	-1.63	NM_001018005.1	tropomyosin 1 (alpha)	-0.0533857
OC3SNGnh.13689_x_at	MIRN642	microRNA 642	-1.55694		OC3SNGnh.5090_x_at	TPM1	1.61775	-1.63	NM_001018005.1	tropomyosin 1 (alpha)	-0.0885967
OC3SNGnh.14831_at	MIRN582	microRNA 582		2.31	OC3SNGnh.5090_x_at	TPM1	1.61775	-1.63	NM_001018005.1	tropomyosin 1 (alpha)	-0.106546
OCADNP.13786_s_at	MIRN301B	microRNA 301b	-1.50238		OC3SNGnh.5090_x_at	TPM1	1.61775	-1.63	NM_001018005.1	tropomyosin 1 (alpha)	-0.184452
OC3SNGnh.16267_at	MIRN497	microRNA 497		3.19	OC3SNGnh.5090_x_at	TPM1	1.61775	-1.63	NM_001018005.1	tropomyosin 1 (alpha)	-0.1877
OCMX.3940.C1_at	MIRN625	microRNA 625		1.51	OC3SNGnh.5090_x_at	TPM1	1.61775	-1.63	NM_001018005.1	tropomyosin 1 (alpha)	-0.190938
OC3SNGnh.14117_at	MIRN557	microRNA 557			OC3SNGnh.5090_x_at	TPM1	1.61775	-1.63	NM_001018005.1	tropomyosin 1 (alpha)	-0.195183
OC3P.11403.C1_s_at	GPR162	microRNA 200c	-1.8663	-1.63	OC3SNGnh.5090_x_at	TPM1	1.61775	-1.63	NM_001018005.1	tropomyosin 1 (alpha)	-0.199759
OC3SNGnh.16168_x_at	MIRN576	microRNA 576		-1.54	OC3SNGnh.5090_x_at	TPM1	1.61775	-1.63	NM_001018005.1	tropomyosin 1 (alpha)	-0.282631
OC3SNGnh.130_s_at	MIRN93	microRNA 93		1.64	OC3SNGnh.5090_x_at	TPM1	1.61775	-1.63	NM_001018005.1	tropomyosin 1 (alpha)	-0.380612
OC3SNGnh.16713_at	MIRN613	microRNA 613	-2.29079		OC3SNGnh.5090_x_at	TPM1	1.61775	-1.63	NM_001018005.1	tropomyosin 1 (alpha)	-0.451759
OCMX.6115.C1_x_at	MIRN301A	microRNA 301a		-1.6	OC3SNGnh.5090_x_at	TPM1	1.61775	-1.63	NM_001018005.1	tropomyosin 1 (alpha)	-0.491154
OC3SNGnh.8532_x_at	MIRN187	microRNA 187			OC3SNGnh.5090_x_at	TPM1	1.61775	-1.63	NM_001018005.1	tropomyosin 1 (alpha)	-0.539089
OC3SNGnh.2107_x_at	MIRN552	microRNA 552	-1.61406		OC3SNGnh.5090_x_at	TPM1	1.61775	-1.63	NM_001018005.1	tropomyosin 1 (alpha)	-0.620846
OC3SNGnh.14375_x_at	MIRN181B2	microRNA 181b-2		-1.58	OC3SNGnh.5090_x_at	TPM1	1.61775	-1.63	NM_001018005.1	tropomyosin 1 (alpha)	-0.621041
OC3SNGnh.5421_at	MIRN561	microRNA 561	-2.17845		OC3SNGnh.5090_x_at	TPM1	1.61775	-1.63	NM_001018005.1	tropomyosin 1 (alpha)	-0.630713
OCMX.6961.C1_at	MIRN30E	microRNA 30e			OCEM.2100_x_at	TP53			NM_001126117.1	tumor protein p53	0.987256
OCRS2.551_x_at	MIRN129-1	microRNA 129-1			OCMX.7434.C1_x_at	TP53		1.51	NM_001126115.1	tumor protein p53	0.982911
OC3SNGnh.16061_x_at	MIRN604	microRNA 604			OC3SNGnh.4528_x_at	TP53		2.04	NM_001126117.1	tumor protein p53	0.976249
OC3SNGnh.2542_at	MIRN103-1	microRNA 103-1		1.94	OC3SNGnh.4528_x_at	TP53		2.04	NM_001126117.1	tumor protein p53	0.972595
OCUTR.226_x_at	MIRN301B	microRNA 301b		1.55	OC3SNGnh.4528_x_at	TP53		2.04	NM_001126117.1	tumor protein p53	0.971844
OCEM.162_at	MIRN592	microRNA 592			OCADNP.8578_s_at	TP53			NM_001126117.1	tumor protein p53	0.971764
OC3SNGnh.5613_x_at	GPR162	microRNA 200c		2.05	OC3SNGnh.4528_x_at	TP53		2.04	NM_001126117.1	tumor protein p53	0.971419
OC3SNGnh.17094_at	MIRN611	microRNA 611		-1.55	OCHPRC.916_at	TP53			NM_001126117.1	tumor protein p53	0.970216
OCMXSNG.1606_at	MIRN593	microRNA 593			OC3SNGnh.4528_x_at	TP53		2.04	NM_001126117.1	tumor protein p53	0.967697
OC3SNGnh.8192_at	MIRN581	microRNA 581		1.53	OCEM.2100_x_at	TP53			NM_001126117.1	tumor protein p53	0.960012
OCMX.8490.C1_at	MIRN139	microRNA 139		1.55	OCMX.7434.C1_x_at	TP53		1.51	NM_001126115.1	tumor protein p53	0.957738
OC3SNGnh.14278_at	MIRN339	microRNA 339		1.64	OCMX.7434.C1_x_at	TP53		1.51	NM_001126115.1	tumor protein p53	0.953238
OC3SNGnh.7187_at	MIRN554	microRNA 554		1.76	OCMX.7434.C1_x_at	TP53		1.51	NM_001126115.1	tumor protein p53	0.941113
OCRS2.11871_at	MIRN633	microRNA 633		1.61	OCMX.7434.C1_x_at	TP53		1.51	NM_001126115.1	tumor protein p53	0.939979
OC3SNGnh.6784_at	MIRN33A	microRNA 33a		1.52	OCHPRC.916_at	TP53			NM_001126117.1	tumor protein p53	0.93929
OCRS2.2867_s_at	MIRN198	microRNA 198		1.6	OC3SNGnh.4528_x_at	TP53		2.04	NM_001126117.1	tumor protein p53	0.935094
OC3SNGnh.127_x_at	C1orf226	microRNA 556			OCEM.2100_x_at	TP53			NM_001126117.1	tumor protein p53	0.933686
OC3SNGnh.10536_at	MIRN101-1	microRNA 101-1		1.63	OCEM.2156_s_at	TP53			NM_001126117.1	tumor protein p53	0.933085
OCMXSNG.4688_x_at	MIRN564	microRNA 564			OC3SNGn.3292-20a_s_at	TP53		-2.29	NM_001126117.1	tumor protein p53	0.932464
OC3SNGnh.7186_x_at	MIRN628	microRNA 628		1.55	OCMX.7434.C1_at	TP53			NM_001126115.1	tumor protein p53	0.931702
OCRS2.5520_s_at	MIRN659	microRNA 659			OCMX.7434.C1_x_at	TP53		1.51	NM_001126115.1	tumor protein p53	0.930643
OC3SNGnh.8192_at	MIRN581	microRNA 581		1.53	OCMX.7434.C1_x_at	TP53		1.51	NM_001126115.1	tumor protein p53	0.929315
OC3SNGnh.14547_x_at	MIRN345	microRNA 345			OCEM.2100_x_at	TP53			NM_001126117.1	tumor protein p53	0.927499
OCUTR.226_x_at	MIRN301B	microRNA 301b		1.55	OCMX.7434.C1_x_at	TP53		1.51	NM_001126115.1	tumor protein p53	0.925684
OC3SNGnh.5613_x_at	GPR162	microRNA 200c		2.05	OCMX.7434.C1_x_at	TP53		1.51	NM_001126115.1	tumor protein p53	0.92495
OC3SNGnh.7187_at	MIRN554	microRNA 554		1.76	OC3SNGnh.4528_x_at	TP53		2.04	NM_001126117.1	tumor protein p53	0.92146
OC3P.3864.C1_x_at	MIRN555	microRNA 555		1.56	OC3SNGnh.6834_at	TP53			NM_001126117.1	tumor protein p53	0.921348
OC3P.13017.C1_x_at	MIRN181D	microRNA 181d		1.51	OCMX.7434.C1_x_at	TP53		1.51	NM_001126115.1	tumor protein p53	0.920783
OC3SNGnh.331_at	MIRN597	microRNA 597			OC3SNGnh.4528_x_at	TP53		2.04	NM_001126117.1	tumor protein p53	0.919426
OC3SNGnh.6784_at	MIRN33A	microRNA 33a		1.52	OC3SNGnh.6834_at	TP53			NM_001126117.1	tumor protein p53	0.917044
OCADNP.15201_s_at	MIRN661	microRNA 661		-1.86	OC3SNGn.3292-20a_s_at	TP53		-2.29	NM_001126117.1	tumor protein p53	0.915839
OCRS2.5520_s_at	MIRN659	microRNA 659			OCEM.2100_x_at	TP53			NM_001126117.1	tumor protein p53	0.909147
OCMX.12930.C1_at	MIRN22	microRNA 22		1.66	OCMX.4067.C1_x_at	TP53			NM_001126117.1	tumor protein p53	0.906182
OCRS2.11871_at	MIRN633	microRNA 633		1.61	OCMX.7434.C1_at	TP53			NM_001126115.1	tumor protein p53	0.901336
OC3SNGnh.14368_at	MIRN614	microRNA 614		-1.76	OC3SNGn.3292-20a_s_at	TP53		-2.29	NM_001126117.1	tumor protein p53	0.898715
OC3SNGnh.17094_at	MIRN611	microRNA 611		-1.55	OCADNP.8578_s_at	TP53			NM_001126117.1	tumor protein p53	0.895467
OC3SNGnh.696_at	MIRN569	microRNA 569		1.92	OCEM.2100_x_at	TP53			NM_001126117.1	tumor protein p53	0.892663
OC3SNGnh.14547_x_at	MIRN345	microRNA 345			OCMX.7434.C1_x_at	TP53		1.51	NM_001126115.1	tumor protein p53	0.890808
OCMX.8490.C1_at	MIRN139	microRNA 139		1.55	OC3SNGnh.4528_x_at	TP53		2.04	NM_001126117.1	tumor protein p53	0.887304
OC3SNGnh.6784_at	MIRN33A	microRNA 33a		1.52	OCEM.2100_at	TP53			NM_001126117.1	tumor protein p53	0.885901
OCMX.2899.C1_at	MIRN210	microRNA 210		1.76	OCMX.7434.C1_x_at	TP53		1.51	NM_001126115.1	tumor protein p53	0.882027
OC3SNGnh.8263_at	MIRN449B	microRNA 449b			OCEM.2156_s_at	TP53			NM_001126117.1	tumor protein p53	0.881747
OC3SNGnh.16061_x_at	MIRN604	microRNA 604			OCMX.7434.C1_x_at	TP53		1.51	NM_001126115.1	tumor protein p53	0.875191
OC3P.3864.C1_at	MIRN555	microRNA 555		-1.5	OCEM.2156_s_at	TP53			NM_001126117.1	tumor protein p53	0.874021
OC3SNGnh.6784_at	MIRN33A	microRNA 33a		1.52	OCMX.7434.C1_x_at	TP53		1.51	NM_001126115.1	tumor protein p53	0.87235
OCRS2.3174_at	MIRN661	microRNA 661		1.54	OC3SNGnh.4528_x_at	TP53		2.04	NM_001126117.1	tumor protein p53	0.872098
OC3SNGnh.127_x_at	C1orf226	microRNA 556			OCMX.7434.C1_x_at	TP53		1.51	NM_001126115.1	tumor protein p53	0.871442
OCMX.12017.C1_at	MIRN146B	microRNA 146b			OCEM.2100_at	TP53			NM_001126117.1	tumor protein p53	0.871347
OCRS2.13103_s_at	MIRN124-3	microRNA 124-3			OCHPRC.916_at	TP53			NM_001126117.1	tumor protein p53	0.86927
OCMX.12930.C1_at	MIRN22	microRNA 22		1.66	OCEM.2156_s_at	TP53			NM_001126117.1	tumor protein p53	0.868888
OCADNP.1035_s_at	MIRN659	microRNA 659		-1.54	OC3SNGn.3292-20a_s_at	TP53		-2.29	NM_001126117.1	tumor protein p53	0.865691
OC3SNGnh.127_x_at	C1orf226	microRNA 556			OCEM.2156_s_at	TP53			NM_001126117.1	tumor protein p53	0.864749
OC3SNGnh.14278_at	MIRN339	microRNA 339		1.64	OC3SNGnh.4528_x_at	TP53		2.04	NM_001126117.1	tumor protein p53	0.863774
OC3SNGnh.4795_x_at	MIRN573	microRNA 573			OCEM.2100_x_at	TP53			NM_001126117.1	tumor protein p53	0.862833
OCRS2.551_x_at	MIRN129-1	microRNA 129-1			OC3SNGnh.4528_x_at	TP53		2.04	NM_001126117.1	tumor protein p53	0.859462
OC3P.3864.C1_at	MIRN555	microRNA 555		-1.5	OCHPRC.916_at	TP53			NM_001126117.1	tumor protein p53	0.859098
OCMX.2904.C1_x_at	MIRN548C	microRNA 548c			OCEM.2100_x_at	TP53			NM_001126117.1	tumor protein p53	0.858618
OCRS2.3174_at	MIRN661	microRNA 661		1.54	OCMX.7434.C1_x_at	TP53		1.51	NM_001126115.1	tumor protein p53	0.857569
OC3SNGnh.17053_at	GPR162	microRNA 200c		-1.55	OCMX.7434.C1_at	TP53			NM_001126115.1	tumor protein p53	0.857159
OC3SNGnh.14278_at	MIRN339	microRNA 339		1.64	OCEM.2100_x_at	TP53			NM_001126117.1	tumor protein p53	0.857016
OC3SNGnh.17094_at	MIRN611	microRNA 611		-1.55	OCEM.2156_s_at	TP53			NM_001126117.1	tumor protein p53	0.85453
OCRS2.3174_at	MIRN661	microRNA 661		1.54	OCHPRC.916_at	TP53			NM_001126117.1	tumor protein p53	0.851077
OC3SNGnh.127_x_at	C1orf226	microRNA 556			OCEM.2100_at	TP53			NM_001126117.1	tumor protein p53	0.848544
OCEM.162_at	MIRN592	microRNA 592			OCHPRC.916_at	TP53			NM_001126117.1	tumor protein p53	0.848513
OCMXSNG.4409_at	MIRN7-1	microRNA 7-1		1.78	OCMX.7434.C1_x_at	TP53		1.51	NM_001126115.1	tumor protein p53	0.847504
OC3P.13017.C1_x_at	MIRN181D	microRNA 181d		1.51	OC3SNGnh.6834_at	TP53			NM_001126117.1	tumor protein p53	0.846987
OC3SNGnh.11550_at	MIRN29C	microRNA 29c		1.55	OC3SNGnh.4528_x_at	TP53		2.04	NM_001126117.1	tumor protein p53	0.84684
OCRS2.13103_s_at	MIRN124-3	microRNA 124-3			OCEM.2156_s_at	TP53			NM_001126117.1	tumor protein p53	0.846754
OCRS2.11871_at	MIRN633	microRNA 633		1.61	OCEM.2100_x_at	TP53			NM_001126117.1	tumor protein p53	0.846324
OC3SNGnh.127_x_at	C1orf226	microRNA 556			OCHPRC.916_at	TP53			NM_001126117.1	tumor protein p53	0.845657
OCRS2.551_x_at	MIRN129-1	microRNA 129-1			OCHPRC.916_at	TP53			NM_001126117.1	tumor protein p53	0.843533
OC3SNGnh.10536_at	MIRN101-1	microRNA 101-1		1.63	OCHPRC.916_at	TP53			NM_001126117.1	tumor protein p53	0.841836
OCMX.2899.C1_at	MIRN210	microRNA 210		1.76	OCEM.2100_x_at	TP53			NM_001126117.1	tumor protein p53	0.840499
OCMX.6961.C1_at	MIRN30E	microRNA 30e			OCMX.7434.C1_x_at	TP53		1.51	NM_001126115.1	tumor protein p53	0.836795
OCMX.2899.C1_at	MIRN210	microRNA 210		1.76	OC3SNGnh.4528_x_at	TP53		2.04	NM_001126117.1	tumor protein p53	0.835671
OCMX.8490.C1_at	MIRN139	microRNA 139		1.55	OCEM.2100_x_at	TP53			NM_001126117.1	tumor protein p53	0.835081
OC3SNGnh.6784_at	MIRN33A	microRNA 33a		1.52	OCADNP.8578_s_at	TP53			NM_001126117.1	tumor protein p53	0.835017
OC3SNGnh.4055_at	MIRN103-2	microRNA 103-2		2.04	OCEM.2100_x_at	TP53			NM_001126117.1	tumor protein p53	0.832203
OCRS2.11871_at	MIRN633	microRNA 633		1.61	OC3SNGnh.6834_at	TP53			NM_001126117.1	tumor protein p53	0.829715
OCRS2.551_x_at	MIRN129-1	microRNA 129-1			OCEM.2100_x_at	TP53			NM_001126117.1	tumor protein p53	0.82968
OC3SNGnh.7186_x_at	MIRN628	microRNA 628		1.55	OCMX.7434.C1_x_at	TP53		1.51	NM_001126115.1	tumor protein p53	0.829307
OC3SNGnh.13337_x_at	MIRN7-3	microRNA 7-3	2.10284		OCEM.2100_x_at	TP53			NM_001126117.1	tumor protein p53	0.826231
OC3SNGnh.4795_x_at	MIRN573	microRNA 573			OCMX.7434.C1_at	TP53			NM_001126115.1	tumor protein p53	0.825744
OC3SNGnh.15682_x_at	MIRN199B	microRNA 199b	1.96522		OCMX.7434.C1_at	TP53			NM_001126115.1	tumor protein p53	0.824789
OCMX.6961.C1_at	MIRN30E	microRNA 30e			OCEM.2100_at	TP53			NM_001126117.1	tumor protein p53	0.824037
OC3SNGnh.2220_at	MIRN149	microRNA 149		1.75	OC3SNGnh.4528_x_at	TP53		2.04	NM_001126117.1	tumor protein p53	0.822536
OC3SNGnh.10216_x_at	MIRN548A2	microRNA 548a-2	-1.5706	2.12	OCADNP.12076_x_at	TP53		3.21	NM_001126117.1	tumor protein p53	0.820154
OC3P.2409.C1_s_at	MIRN21	microRNA 21		1.86	OCMX.7434.C1_at	TP53			NM_001126115.1	tumor protein p53	0.818563
OC3SNGnh.8192_at	MIRN581	microRNA 581		1.53	OCEM.2156_s_at	TP53			NM_001126117.1	tumor protein p53	0.817879
OC3SNGnh.14547_x_at	MIRN345	microRNA 345			OCMX.7434.C1_at	TP53			NM_001126115.1	tumor protein p53	0.816717
OCRS2.5520_s_at	MIRN659	microRNA 659			OC3SNGnh.4528_x_at	TP53		2.04	NM_001126117.1	tumor protein p53	0.815766
OC3P.13017.C1_x_at	MIRN181D	microRNA 181d		1.51	OC3SNGnh.4528_x_at	TP53		2.04	NM_001126117.1	tumor protein p53	0.815667
OCRS2.5576_x_at	MIRN324	microRNA 324			OCEM.2100_x_at	TP53			NM_001126117.1	tumor protein p53	0.815504
OCRS2.13103_s_at	MIRN124-3	microRNA 124-3			OC3SNGnh.4528_x_at	TP53		2.04	NM_001126117.1	tumor protein p53	0.814639
OC3SNGnh.14547_x_at	MIRN345	microRNA 345			OC3SNGnh.6834_at	TP53			NM_001126117.1	tumor protein p53	0.814241
OCMX.12930.C1_at	MIRN22	microRNA 22		1.66	OCEM.2100_x_at	TP53			NM_001126117.1	tumor protein p53	0.814168
OCEM.162_at	MIRN592	microRNA 592			OC3SNGnh.6834_at	TP53			NM_001126117.1	tumor protein p53	0.81365
OC3SNGnh.2542_at	MIRN103-1	microRNA 103-1		1.94	OCMX.7434.C1_x_at	TP53		1.51	NM_001126115.1	tumor protein p53	0.81183
OC3P.13017.C1_x_at	MIRN181D	microRNA 181d		1.51	OCMX.7434.C1_at	TP53			NM_001126115.1	tumor protein p53	0.811778
OCADNP.15201_s_at	MIRN661	microRNA 661		-1.86	OCHPRC.916_at	TP53			NM_001126117.1	tumor protein p53	0.810896
OC3SNGnh.127_x_at	C1orf226	microRNA 556			OCADNP.12076_x_at	TP53		3.21	NM_001126117.1	tumor protein p53	0.810748
OCMXSNG.4409_at	MIRN7-1	microRNA 7-1		1.78	OC3SNGnh.4528_x_at	TP53		2.04	NM_001126117.1	tumor protein p53	0.810326
OC3SNGnh.8192_at	MIRN581	microRNA 581		1.53	OCEM.2100_at	TP53			NM_001126117.1	tumor protein p53	0.810163
OC3SNGnh.8192_at	MIRN581	microRNA 581		1.53	OCHPRC.916_at	TP53			NM_001126117.1	tumor protein p53	0.810108
OC3SNGnh.331_at	MIRN597	microRNA 597			OCMX.7434.C1_x_at	TP53		1.51	NM_001126115.1	tumor protein p53	0.809815
OC3P.13017.C1_x_at	MIRN181D	microRNA 181d		1.51	OCEM.2100_x_at	TP53			NM_001126117.1	tumor protein p53	0.807364
OCRS2.13103_s_at	MIRN124-3	microRNA 124-3			OCMX.7434.C1_x_at	TP53		1.51	NM_001126115.1	tumor protein p53	0.803667
OC3SNGnh.12857_x_at	MIRN600	microRNA 600			OCMX.7434.C1_at	TP53			NM_001126115.1	tumor protein p53	0.803297
OC3SNGnh.4055_at	MIRN103-2	microRNA 103-2		2.04	OCMX.7434.C1_x_at	TP53		1.51	NM_001126115.1	tumor protein p53	0.801469
OC3SNGnh.10216_x_at	MIRN548A2	microRNA 548a-2	-1.5706	2.12	OCMX.4067.C1_x_at	TP53			NM_001126117.1	tumor protein p53	0.798016
OC3SNGnh.6784_at	MIRN33A	microRNA 33a		1.52	OCADNP.12076_x_at	TP53		3.21	NM_001126117.1	tumor protein p53	0.79768
OC3SNGnh.10536_at	MIRN101-1	microRNA 101-1		1.63	OCMX.7434.C1_x_at	TP53		1.51	NM_001126115.1	tumor protein p53	0.797613
OCRS2.551_x_at	MIRN129-1	microRNA 129-1			OCEM.2156_s_at	TP53			NM_001126117.1	tumor protein p53	0.797213
OCRS2.3174_at	MIRN661	microRNA 661		1.54	OCEM.2156_s_at	TP53			NM_001126117.1	tumor protein p53	0.791757
OC3SNGnh.8370_at	MIRN138-2	microRNA 138-2			OCMX.7434.C1_x_at	TP53		1.51	NM_001126115.1	tumor protein p53	0.786812
OCRS2.5576_x_at	MIRN324	microRNA 324			OCMX.7434.C1_x_at	TP53		1.51	NM_001126115.1	tumor protein p53	0.785905
OC3SNGnh.14547_x_at	MIRN345	microRNA 345			OCEM.2100_at	TP53			NM_001126117.1	tumor protein p53	0.784547
OC3SNGnh.6784_at	MIRN33A	microRNA 33a		1.52	OCEM.2156_s_at	TP53			NM_001126117.1	tumor protein p53	0.78407
OCMXSNG.4409_at	MIRN7-1	microRNA 7-1		1.78	OCEM.2100_x_at	TP53			NM_001126117.1	tumor protein p53	0.783973
OCRS2.11871_at	MIRN633	microRNA 633		1.61	OC3SNGnh.4528_x_at	TP53		2.04	NM_001126117.1	tumor protein p53	0.783344
OC3SNGnh.14368_at	MIRN614	microRNA 614		-1.76	OC3SNGnh.4528_x_at	TP53		2.04	NM_001126117.1	tumor protein p53	0.778181
OCRS2.2867_s_at	MIRN198	microRNA 198		1.6	OCMX.7434.C1_x_at	TP53		1.51	NM_001126115.1	tumor protein p53	0.77637
OC3P.3864.C1_at	MIRN555	microRNA 555		-1.5	OC3SNGn.3292-20a_s_at	TP53		-2.29	NM_001126117.1	tumor protein p53	0.774941
OCRS2.5520_s_at	MIRN659	microRNA 659			OCMX.7434.C1_at	TP53			NM_001126115.1	tumor protein p53	0.770172
OC3SNGnh.10536_at	MIRN101-1	microRNA 101-1		1.63	OCMX.4067.C1_x_at	TP53			NM_001126117.1	tumor protein p53	0.769137
OCMX.12017.C1_at	MIRN146B	microRNA 146b			OCADNP.12076_x_at	TP53		3.21	NM_001126117.1	tumor protein p53	0.768543
OC3SNGnh.10536_at	MIRN101-1	microRNA 101-1		1.63	OC3SNGnh.4528_x_at	TP53		2.04	NM_001126117.1	tumor protein p53	0.766736
OCADNP.1035_s_at	MIRN659	microRNA 659		-1.54	OCHPRC.916_at	TP53			NM_001126117.1	tumor protein p53	0.765959
OCMX.12017.C1_at	MIRN146B	microRNA 146b			OCEM.2100_x_at	TP53			NM_001126117.1	tumor protein p53	0.765857
OC3SNGnh.16592_x_at	MIRN425	microRNA 425			OC3SNGnh.4528_x_at	TP53		2.04	NM_001126117.1	tumor protein p53	0.762254
OCMX.12017.C1_at	MIRN146B	microRNA 146b			OC3SNGnh.6834_at	TP53			NM_001126117.1	tumor protein p53	0.761564
OC3SNGnh.8263_at	MIRN449B	microRNA 449b			OCMX.4067.C1_x_at	TP53			NM_001126117.1	tumor protein p53	0.76152
OCMX.6961.C1_at	MIRN30E	microRNA 30e			OCMX.7434.C1_at	TP53			NM_001126115.1	tumor protein p53	0.760827
OCMX.8490.C1_at	MIRN139	microRNA 139		1.55	OCHPRC.916_at	TP53			NM_001126117.1	tumor protein p53	0.758138
OCMX.8490.C1_at	MIRN139	microRNA 139		1.55	OCEM.2156_s_at	TP53			NM_001126117.1	tumor protein p53	0.757632
OC3SNGnh.7186_x_at	MIRN628	microRNA 628		1.55	OC3SNGnh.6834_at	TP53			NM_001126117.1	tumor protein p53	0.756631
OCMX.6961.C1_at	MIRN30E	microRNA 30e			OCADNP.12076_x_at	TP53		3.21	NM_001126117.1	tumor protein p53	0.755285
OC3SNGnh.17094_at	MIRN611	microRNA 611		-1.55	OCMX.7434.C1_x_at	TP53		1.51	NM_001126115.1	tumor protein p53	0.753996
OCADNP.1035_s_at	MIRN659	microRNA 659		-1.54	OCMX.7434.C1_x_at	TP53		1.51	NM_001126115.1	tumor protein p53	0.753854
OCMX.12930.C1_at	MIRN22	microRNA 22		1.66	OCADNP.12076_x_at	TP53		3.21	NM_001126117.1	tumor protein p53	0.751147
OC3SNGnh.14117_at	MIRN557	microRNA 557			OCEM.2100_at	TP53			NM_001126117.1	tumor protein p53	0.750441
OC3SNGnh.7187_at	MIRN554	microRNA 554		1.76	OCHPRC.916_at	TP53			NM_001126117.1	tumor protein p53	0.747956
OC3SNGnh.8263_at	MIRN449B	microRNA 449b			OCHPRC.916_at	TP53			NM_001126117.1	tumor protein p53	0.747198
OC3SNGnh.6784_at	MIRN33A	microRNA 33a		1.52	OCEM.2100_x_at	TP53			NM_001126117.1	tumor protein p53	0.747082
OC3SNGnh.8370_at	MIRN138-2	microRNA 138-2			OC3SNGnh.6834_at	TP53			NM_001126117.1	tumor protein p53	0.743897
OC3P.2409.C1_s_at	MIRN21	microRNA 21		1.86	OCEM.2100_x_at	TP53			NM_001126117.1	tumor protein p53	0.743722
OC3SNGnh.2220_at	MIRN149	microRNA 149		1.75	OCMX.7434.C1_x_at	TP53		1.51	NM_001126115.1	tumor protein p53	0.742659
OC3SNGnh.8192_at	MIRN581	microRNA 581		1.53	OCADNP.12076_x_at	TP53		3.21	NM_001126117.1	tumor protein p53	0.742118
OCMX.12930.C1_at	MIRN22	microRNA 22		1.66	OCMX.7434.C1_x_at	TP53		1.51	NM_001126115.1	tumor protein p53	0.741337
OCMXSNG.4409_at	MIRN7-1	microRNA 7-1		1.78	OC3SNGnh.6834_at	TP53			NM_001126117.1	tumor protein p53	0.741304
OCADNP.18636_s_at	MIRN572	microRNA 572			OC3SNGn.3292-20a_s_at	TP53		-2.29	NM_001126117.1	tumor protein p53	0.741136
OCADNP.1035_s_at	MIRN659	microRNA 659		-1.54	OCADNP.8578_s_at	TP53			NM_001126117.1	tumor protein p53	0.740666
OC3SNGnh.8192_at	MIRN581	microRNA 581		1.53	OCMX.7434.C1_at	TP53			NM_001126115.1	tumor protein p53	0.739361
OC3SNGnh.7186_x_at	MIRN628	microRNA 628		1.55	OCEM.2100_x_at	TP53			NM_001126117.1	tumor protein p53	0.739257
OC3SNGnh.14278_at	MIRN339	microRNA 339		1.64	OCEM.2156_s_at	TP53			NM_001126117.1	tumor protein p53	0.738484
OCMXSNG.4409_at	MIRN7-1	microRNA 7-1		1.78	OCMX.7434.C1_at	TP53			NM_001126115.1	tumor protein p53	0.73773
OCMX.2899.C1_at	MIRN210	microRNA 210		1.76	OCEM.2156_s_at	TP53			NM_001126117.1	tumor protein p53	0.737169
OC3SNGnh.17094_at	MIRN611	microRNA 611		-1.55	OC3SNGn.3292-20a_s_at	TP53		-2.29	NM_001126117.1	tumor protein p53	0.737002
OCMX.6961.C1_at	MIRN30E	microRNA 30e			OCEM.2156_s_at	TP53			NM_001126117.1	tumor protein p53	0.735532
OC3SNGnh.15682_x_at	MIRN199B	microRNA 199b	1.96522		OCEM.2100_x_at	TP53			NM_001126117.1	tumor protein p53	0.734857
OCADNP.1035_s_at	MIRN659	microRNA 659		-1.54	OC3SNGnh.4528_x_at	TP53		2.04	NM_001126117.1	tumor protein p53	0.73456
OCADNP.15201_s_at	MIRN661	microRNA 661		-1.86	OCADNP.8578_s_at	TP53			NM_001126117.1	tumor protein p53	0.73203
OC3SNGnh.8370_at	MIRN138-2	microRNA 138-2			OCMX.7434.C1_at	TP53			NM_001126115.1	tumor protein p53	0.728145
OC3P.3864.C1_at	MIRN555	microRNA 555		-1.5	OCADNP.8578_s_at	TP53			NM_001126117.1	tumor protein p53	0.727974
OCRS2.5576_x_at	MIRN324	microRNA 324			OC3SNGnh.4528_x_at	TP53		2.04	NM_001126117.1	tumor protein p53	0.727468
OCRS2.551_x_at	MIRN129-1	microRNA 129-1			OC3SNGnh.6834_at	TP53			NM_001126117.1	tumor protein p53	0.726843
OC3SNGnh.331_at	MIRN597	microRNA 597			OCMX.7434.C1_at	TP53			NM_001126115.1	tumor protein p53	0.724708
OCMXSNG.1606_at	MIRN593	microRNA 593			OCMX.7434.C1_x_at	TP53		1.51	NM_001126115.1	tumor protein p53	0.724303
OC3SNGnh.127_x_at	C1orf226	microRNA 556			OCMX.4067.C1_x_at	TP53			NM_001126117.1	tumor protein p53	0.71858
OCADNP.15201_s_at	MIRN661	microRNA 661		-1.86	OCMX.7434.C1_x_at	TP53		1.51	NM_001126115.1	tumor protein p53	0.718082
OC3P.12763.C1_x_at	MIRN151	microRNA 151		1.74	OC3SNGnh.4528_x_at	TP53		2.04	NM_001126117.1	tumor protein p53	0.717713
OCMX.12930.C1_at	MIRN22	microRNA 22		1.66	OCHPRC.916_at	TP53			NM_001126117.1	tumor protein p53	0.717398
OC3SNGnh.14278_at	MIRN339	microRNA 339		1.64	OCMX.7434.C1_at	TP53			NM_001126115.1	tumor protein p53	0.717353
OC3SNGnh.8192_at	MIRN581	microRNA 581		1.53	OC3SNGnh.6834_at	TP53			NM_001126117.1	tumor protein p53	0.717352
OC3P.12763.C1_at	MIRN151	microRNA 151			OC3SNGnh.4528_x_at	TP53		2.04	NM_001126117.1	tumor protein p53	0.717076
OC3SNGnh.4055_at	MIRN103-2	microRNA 103-2		2.04	OC3SNGnh.4528_x_at	TP53		2.04	NM_001126117.1	tumor protein p53	0.715076
OC3SNGnh.14278_at	MIRN339	microRNA 339		1.64	OCHPRC.916_at	TP53			NM_001126117.1	tumor protein p53	0.713322
OCADNP.15201_s_at	MIRN661	microRNA 661		-1.86	OC3SNGnh.4528_x_at	TP53		2.04	NM_001126117.1	tumor protein p53	0.709054
OC3SNGnh.18430_at	MIRN566	microRNA 566	-1.63878	1.54	OC3SNGnh.4528_x_at	TP53		2.04	NM_001126117.1	tumor protein p53	0.70852
OCRS2.5576_x_at	MIRN324	microRNA 324			OCMX.7434.C1_at	TP53			NM_001126115.1	tumor protein p53	0.708297
OC3SNGnh.7186_x_at	MIRN628	microRNA 628		1.55	OC3SNGnh.4528_x_at	TP53		2.04	NM_001126117.1	tumor protein p53	0.707782
OCMX.2904.C1_x_at	MIRN548C	microRNA 548c			OCMX.7434.C1_x_at	TP53		1.51	NM_001126115.1	tumor protein p53	0.707633
OC3SNGnh.2220_at	MIRN149	microRNA 149		1.75	OCEM.2100_x_at	TP53			NM_001126117.1	tumor protein p53	0.706681
OC3SNGnh.8370_at	MIRN138-2	microRNA 138-2			OC3SNGnh.4528_x_at	TP53		2.04	NM_001126117.1	tumor protein p53	0.70604
OC3SNGnh.696_at	MIRN569	microRNA 569		1.92	OCMX.7434.C1_x_at	TP53		1.51	NM_001126115.1	tumor protein p53	0.705193
OC3P.3864.C1_x_at	MIRN555	microRNA 555		1.56	OCMX.7434.C1_x_at	TP53		1.51	NM_001126115.1	tumor protein p53	0.703378
OCMXSNG.1606_at	MIRN593	microRNA 593			OC3SNGn.3292-20a_s_at	TP53		-2.29	NM_001126117.1	tumor protein p53	0.703275
OCADNP.18636_s_at	MIRN572	microRNA 572			OCEM.1388_x_at	TP53			NM_001126117.1	tumor protein p53	0.702767
OCUTR.226_x_at	MIRN301B	microRNA 301b		1.55	OCEM.2100_x_at	TP53			NM_001126117.1	tumor protein p53	0.702109
OCMX.6961.C1_at	MIRN30E	microRNA 30e			OCHPRC.916_at	TP53			NM_001126117.1	tumor protein p53	0.70056
OC3SNGnh.7187_at	MIRN554	microRNA 554		1.76	OCMX.7434.C1_at	TP53			NM_001126115.1	tumor protein p53	0.699376
OCRS2.551_x_at	MIRN129-1	microRNA 129-1			OCMX.7434.C1_at	TP53			NM_001126115.1	tumor protein p53	0.699162
OC3SNGnh.8263_at	MIRN449B	microRNA 449b			OCADNP.12076_x_at	TP53		3.21	NM_001126117.1	tumor protein p53	0.69884
OC3SNGnh.13689_x_at	MIRN642	microRNA 642	-1.55694		OC3SNGnh.4528_x_at	TP53		2.04	NM_001126117.1	tumor protein p53	0.698532
OCRS2.3174_at	MIRN661	microRNA 661		1.54	OC3SNGnh.6834_at	TP53			NM_001126117.1	tumor protein p53	0.693895
OCMX.2899.C1_at	MIRN210	microRNA 210		1.76	OCMX.4067.C1_x_at	TP53			NM_001126117.1	tumor protein p53	0.690901
OCADNP.1035_s_at	MIRN659	microRNA 659		-1.54	OC3SNGnh.6834_at	TP53			NM_001126117.1	tumor protein p53	0.690227
OC3SNGnh.127_x_at	C1orf226	microRNA 556			OC3SNGnh.6834_at	TP53			NM_001126117.1	tumor protein p53	0.689194
OC3P.2409.C1_s_at	MIRN21	microRNA 21		1.86	OCMX.7434.C1_x_at	TP53		1.51	NM_001126115.1	tumor protein p53	0.686092
OC3P.13017.C1_x_at	MIRN181D	microRNA 181d		1.51	OCEM.2100_at	TP53			NM_001126117.1	tumor protein p53	0.683854
OCEM.162_at	MIRN592	microRNA 592			OCEM.2100_at	TP53			NM_001126117.1	tumor protein p53	0.683219
OC3SNGnh.7187_at	MIRN554	microRNA 554		1.76	OC3SNGnh.6834_at	TP53			NM_001126117.1	tumor protein p53	0.68284
OC3SNGnh.17053_at	GPR162	microRNA 200c		-1.55	OCMX.7434.C1_x_at	TP53		1.51	NM_001126115.1	tumor protein p53	0.682236
OCRS2.11871_at	MIRN633	microRNA 633		1.61	OCEM.2100_at	TP53			NM_001126117.1	tumor protein p53	0.682128
OC3SNGnh.8192_at	MIRN581	microRNA 581		1.53	OCMX.4067.C1_x_at	TP53			NM_001126117.1	tumor protein p53	0.681403
OC3SNGnh.5613_x_at	GPR162	microRNA 200c		2.05	OCMX.7434.C1_at	TP53			NM_001126115.1	tumor protein p53	0.681296
OCUTR.226_x_at	MIRN301B	microRNA 301b		1.55	OCHPRC.916_at	TP53			NM_001126117.1	tumor protein p53	0.679906
OCMX.8490.C1_at	MIRN139	microRNA 139		1.55	OCMX.7434.C1_at	TP53			NM_001126115.1	tumor protein p53	0.678879
OCRS2.13103_s_at	MIRN124-3	microRNA 124-3			OCADNP.8578_s_at	TP53			NM_001126117.1	tumor protein p53	0.677756
OC3SNGnh.14547_x_at	MIRN345	microRNA 345			OC3SNGnh.4528_x_at	TP53		2.04	NM_001126117.1	tumor protein p53	0.677539
OC3SNGnh.127_x_at	C1orf226	microRNA 556			OCMX.7434.C1_at	TP53			NM_001126115.1	tumor protein p53	0.677447
OC3SNGnh.5613_x_at	GPR162	microRNA 200c		2.05	OCEM.2100_x_at	TP53			NM_001126117.1	tumor protein p53	0.677433
OC3SNGnh.17094_at	MIRN611	microRNA 611		-1.55	OC3SNGnh.6834_at	TP53			NM_001126117.1	tumor protein p53	0.676167
OCRS2.551_x_at	MIRN129-1	microRNA 129-1			OCEM.2100_at	TP53			NM_001126117.1	tumor protein p53	0.674228
OCADNP.13786_s_at	MIRN301B	microRNA 301b	-1.50238		OCEM.1388_x_at	TP53			NM_001126117.1	tumor protein p53	0.672783
OC3SNGnh.4055_at	MIRN103-2	microRNA 103-2		2.04	OC3SNGnh.6834_at	TP53			NM_001126117.1	tumor protein p53	0.671974
OC3SNGnh.8370_at	MIRN138-2	microRNA 138-2			OC3SNGn.3292-20a_s_at	TP53		-2.29	NM_001126117.1	tumor protein p53	0.671967
OC3SNGnh.7187_at	MIRN554	microRNA 554		1.76	OC3SNGn.3292-20a_s_at	TP53		-2.29	NM_001126117.1	tumor protein p53	0.670583
OC3SNGnh.4055_at	MIRN103-2	microRNA 103-2		2.04	OCEM.2100_at	TP53			NM_001126117.1	tumor protein p53	0.670449
OCMX.2904.C1_x_at	MIRN548C	microRNA 548c			OCMX.4067.C1_x_at	TP53			NM_001126117.1	tumor protein p53	0.670054
OCMX.6961.C1_at	MIRN30E	microRNA 30e			OCMX.4067.C1_x_at	TP53			NM_001126117.1	tumor protein p53	0.669478
OC3SNGnh.16061_x_at	MIRN604	microRNA 604			OCMX.7434.C1_at	TP53			NM_001126115.1	tumor protein p53	0.666156
OCRS2.5576_x_at	MIRN324	microRNA 324			OC3SNGnh.6834_at	TP53			NM_001126117.1	tumor protein p53	0.664988
OCADNP.15201_s_at	MIRN661	microRNA 661		-1.86	OCEM.2156_s_at	TP53			NM_001126117.1	tumor protein p53	0.664106
OC3P.3864.C1_x_at	MIRN555	microRNA 555		1.56	OCEM.2100_at	TP53			NM_001126117.1	tumor protein p53	0.664103
OCMX.2899.C1_at	MIRN210	microRNA 210		1.76	OCHPRC.916_at	TP53			NM_001126117.1	tumor protein p53	0.6632
OC3SNGnh.696_at	MIRN569	microRNA 569		1.92	OCMX.4067.C1_x_at	TP53			NM_001126117.1	tumor protein p53	0.660597
OCEM.162_at	MIRN592	microRNA 592			OC3SNGn.3292-20a_s_at	TP53		-2.29	NM_001126117.1	tumor protein p53	0.656547
OCRS2.3174_at	MIRN661	microRNA 661		1.54	OCADNP.8578_s_at	TP53			NM_001126117.1	tumor protein p53	0.654081
OC3SNGnh.10216_x_at	MIRN548A2	microRNA 548a-2	-1.5706	2.12	OCEM.2156_s_at	TP53			NM_001126117.1	tumor protein p53	0.65366
OCMX.8490.C1_at	MIRN139	microRNA 139		1.55	OC3SNGnh.6834_at	TP53			NM_001126117.1	tumor protein p53	0.6535
OCMX.6961.C1_at	MIRN30E	microRNA 30e			OC3SNGnh.6834_at	TP53			NM_001126117.1	tumor protein p53	0.652949
OC3SNGnh.17094_at	MIRN611	microRNA 611		-1.55	OCEM.2100_at	TP53			NM_001126117.1	tumor protein p53	0.652855
OC3P.2409.C1_s_at	MIRN21	microRNA 21		1.86	OC3SNGnh.4528_x_at	TP53		2.04	NM_001126117.1	tumor protein p53	0.650507
OC3SNGnh.16061_x_at	MIRN604	microRNA 604			OCEM.2100_x_at	TP53			NM_001126117.1	tumor protein p53	0.649852
OC3SNGnh.4055_at	MIRN103-2	microRNA 103-2		2.04	OCADNP.12076_x_at	TP53		3.21	NM_001126117.1	tumor protein p53	0.649051
OC3SNGnh.8192_at	MIRN581	microRNA 581		1.53	OC3SNGnh.4528_x_at	TP53		2.04	NM_001126117.1	tumor protein p53	0.648283
OC3P.3864.C1_x_at	MIRN555	microRNA 555		1.56	OCMX.7434.C1_at	TP53			NM_001126115.1	tumor protein p53	0.648158
OCRS2.5520_s_at	MIRN659	microRNA 659			OCEM.2156_s_at	TP53			NM_001126117.1	tumor protein p53	0.647911
OC3SNGnh.2220_at	MIRN149	microRNA 149		1.75	OCMX.7434.C1_at	TP53			NM_001126115.1	tumor protein p53	0.647329
OCRS2.5520_s_at	MIRN659	microRNA 659			OC3SNGnh.6834_at	TP53			NM_001126117.1	tumor protein p53	0.646715
OC3P.13017.C1_x_at	MIRN181D	microRNA 181d		1.51	OCHPRC.916_at	TP53			NM_001126117.1	tumor protein p53	0.646639
OC3SNGnh.5613_x_at	GPR162	microRNA 200c		2.05	OCHPRC.916_at	TP53			NM_001126117.1	tumor protein p53	0.645216
OC3SNGnh.14117_at	MIRN557	microRNA 557			OC3SNGnh.6834_at	TP53			NM_001126117.1	tumor protein p53	0.643677
OCMX.12930.C1_at	MIRN22	microRNA 22		1.66	OCEM.2100_at	TP53			NM_001126117.1	tumor protein p53	0.641812
OCUTR.226_x_at	MIRN301B	microRNA 301b		1.55	OCEM.2156_s_at	TP53			NM_001126117.1	tumor protein p53	0.641653
OC3P.11403.C1_s_at	GPR162	microRNA 200c	-1.8663	-1.63	OC3SNGn.3292-20a_s_at	TP53		-2.29	NM_001126117.1	tumor protein p53	0.641559
OC3SNGnh.7187_at	MIRN554	microRNA 554		1.76	OCEM.2100_x_at	TP53			NM_001126117.1	tumor protein p53	0.640776
OC3SNGnh.13337_x_at	MIRN7-3	microRNA 7-3	2.10284		OCMX.4067.C1_x_at	TP53			NM_001126117.1	tumor protein p53	0.640621
OCUTR.226_x_at	MIRN301B	microRNA 301b		1.55	OCMX.7434.C1_at	TP53			NM_001126115.1	tumor protein p53	0.640485
OC3SNGnh.130_s_at	MIRN93	microRNA 93		1.64	OCEM.2100_at	TP53			NM_001126117.1	tumor protein p53	0.640316
OC3SNGnh.14547_x_at	MIRN345	microRNA 345			OCHPRC.916_at	TP53			NM_001126117.1	tumor protein p53	0.639565
OC3SNGnh.4055_at	MIRN103-2	microRNA 103-2		2.04	OCMX.4067.C1_x_at	TP53			NM_001126117.1	tumor protein p53	0.639074
OCRS2.2867_s_at	MIRN198	microRNA 198		1.6	OCMX.7434.C1_at	TP53			NM_001126115.1	tumor protein p53	0.638984
OCRS2.13103_s_at	MIRN124-3	microRNA 124-3			OC3SNGnh.6834_at	TP53			NM_001126117.1	tumor protein p53	0.638369
OCRS2.5520_s_at	MIRN659	microRNA 659			OCHPRC.916_at	TP53			NM_001126117.1	tumor protein p53	0.637773
OC3SNGnh.4055_at	MIRN103-2	microRNA 103-2		2.04	OCEM.2156_s_at	TP53			NM_001126117.1	tumor protein p53	0.636364
OC3SNGnh.14547_x_at	MIRN345	microRNA 345			OCADNP.12076_x_at	TP53		3.21	NM_001126117.1	tumor protein p53	0.635731
OC3SNGnh.12857_x_at	MIRN600	microRNA 600			OC3SNGnh.4528_x_at	TP53		2.04	NM_001126117.1	tumor protein p53	0.633936
OCRS2.13103_s_at	MIRN124-3	microRNA 124-3			OCMX.4067.C1_x_at	TP53			NM_001126117.1	tumor protein p53	0.633904
OC3SNGnh.14368_at	MIRN614	microRNA 614		-1.76	OCMX.7434.C1_x_at	TP53		1.51	NM_001126115.1	tumor protein p53	0.630626
OCMX.2904.C1_x_at	MIRN548C	microRNA 548c			OCMX.7434.C1_at	TP53			NM_001126115.1	tumor protein p53	0.629895
OC3SNGnh.6784_at	MIRN33A	microRNA 33a		1.52	OC3SNGnh.4528_x_at	TP53		2.04	NM_001126117.1	tumor protein p53	0.629671
OC3SNGnh.10536_at	MIRN101-1	microRNA 101-1		1.63	OCEM.2100_x_at	TP53			NM_001126117.1	tumor protein p53	0.629546
OC3SNGnh.14117_at	MIRN557	microRNA 557			OCEM.2100_x_at	TP53			NM_001126117.1	tumor protein p53	0.628221
OC3SNGnh.696_at	MIRN569	microRNA 569		1.92	OCMX.7434.C1_at	TP53			NM_001126115.1	tumor protein p53	0.627337
OC3SNGnh.17094_at	MIRN611	microRNA 611		-1.55	OCADNP.12076_x_at	TP53		3.21	NM_001126117.1	tumor protein p53	0.625975
OC3SNGnh.14117_at	MIRN557	microRNA 557			OCADNP.12076_x_at	TP53		3.21	NM_001126117.1	tumor protein p53	0.62531
OC3P.3864.C1_at	MIRN555	microRNA 555		-1.5	OCEM.1388_x_at	TP53			NM_001126117.1	tumor protein p53	0.624985
OC3SNGnh.331_at	MIRN597	microRNA 597			OCEM.2100_x_at	TP53			NM_001126117.1	tumor protein p53	0.623567
OCRS2.11871_at	MIRN633	microRNA 633		1.61	OCHPRC.916_at	TP53			NM_001126117.1	tumor protein p53	0.622935
OC3SNGnh.18430_at	MIRN566	microRNA 566	-1.63878	1.54	OCEM.1388_x_at	TP53			NM_001126117.1	tumor protein p53	0.622035
OC3SNGnh.2542_at	MIRN103-1	microRNA 103-1		1.94	OCMX.7434.C1_at	TP53			NM_001126115.1	tumor protein p53	0.621135
OCRS2.5520_s_at	MIRN659	microRNA 659			OCEM.2100_at	TP53			NM_001126117.1	tumor protein p53	0.620894
OC3SNGnh.8263_at	MIRN449B	microRNA 449b			OCADNP.8578_s_at	TP53			NM_001126117.1	tumor protein p53	0.619603
OC3SNGnh.4055_at	MIRN103-2	microRNA 103-2		2.04	OCHPRC.916_at	TP53			NM_001126117.1	tumor protein p53	0.618116
OCMX.12017.C1_at	MIRN146B	microRNA 146b			OCMX.7434.C1_at	TP53			NM_001126115.1	tumor protein p53	0.616348
OC3SNGnh.130_s_at	MIRN93	microRNA 93		1.64	OCEM.1388_at	TP53			NM_001126117.1	tumor protein p53	0.615794
OCMXSNG.4688_x_at	MIRN564	microRNA 564			OCADNP.8578_s_at	TP53			NM_001126117.1	tumor protein p53	0.615022
OC3SNGnh.12857_x_at	MIRN600	microRNA 600			OCMX.7434.C1_x_at	TP53		1.51	NM_001126115.1	tumor protein p53	0.614747
OC3SNGnh.4795_x_at	MIRN573	microRNA 573			OCMX.7434.C1_x_at	TP53		1.51	NM_001126115.1	tumor protein p53	0.614729
OC3SNGnh.7187_at	MIRN554	microRNA 554		1.76	OCEM.2156_s_at	TP53			NM_001126117.1	tumor protein p53	0.614691
OC3SNGnh.8370_at	MIRN138-2	microRNA 138-2			OCHPRC.916_at	TP53			NM_001126117.1	tumor protein p53	0.613712
OCRS2.3174_at	MIRN661	microRNA 661		1.54	OCEM.2100_x_at	TP53			NM_001126117.1	tumor protein p53	0.612834
OC3P.3864.C1_x_at	MIRN555	microRNA 555		1.56	OC3SNGnh.4528_x_at	TP53		2.04	NM_001126117.1	tumor protein p53	0.612199
OCRS2.13103_s_at	MIRN124-3	microRNA 124-3			OCADNP.12076_x_at	TP53		3.21	NM_001126117.1	tumor protein p53	0.611915
OCMXSNG.4688_x_at	MIRN564	microRNA 564			OC3SNGnh.4528_x_at	TP53		2.04	NM_001126117.1	tumor protein p53	0.608697
OCUTR.226_x_at	MIRN301B	microRNA 301b		1.55	OC3SNGnh.6834_at	TP53			NM_001126117.1	tumor protein p53	0.607069
OCMX.2899.C1_at	MIRN210	microRNA 210		1.76	OCMX.7434.C1_at	TP53			NM_001126115.1	tumor protein p53	0.604381
OC3P.3864.C1_at	MIRN555	microRNA 555		-1.5	OCMX.7434.C1_x_at	TP53		1.51	NM_001126115.1	tumor protein p53	0.603353
OCMX.8490.C1_at	MIRN139	microRNA 139		1.55	OCEM.2100_at	TP53			NM_001126117.1	tumor protein p53	0.603097
OC3SNGnh.13337_x_at	MIRN7-3	microRNA 7-3	2.10284		OCMX.7434.C1_at	TP53			NM_001126115.1	tumor protein p53	0.602127
OC3SNGnh.696_at	MIRN569	microRNA 569		1.92	OCEM.2100_at	TP53			NM_001126117.1	tumor protein p53	0.6021
OCEM.162_at	MIRN592	microRNA 592			OCEM.1388_at	TP53			NM_001126117.1	tumor protein p53	0.601491
OC3SNGnh.14368_at	MIRN614	microRNA 614		-1.76	OCHPRC.916_at	TP53			NM_001126117.1	tumor protein p53	0.600193
OCADNP.18636_s_at	MIRN572	microRNA 572			OCEM.2156_s_at	TP53			NM_001126117.1	tumor protein p53	0.599603
OC3SNGnh.16168_x_at	MIRN576	microRNA 576		-1.54	OC3SNGn.3292-20a_s_at	TP53		-2.29	NM_001126117.1	tumor protein p53	0.59938
OCMX.12930.C1_at	MIRN22	microRNA 22		1.66	OC3SNGnh.4528_x_at	TP53		2.04	NM_001126117.1	tumor protein p53	0.599282
OCRS2.3174_at	MIRN661	microRNA 661		1.54	OC3SNGn.3292-20a_s_at	TP53		-2.29	NM_001126117.1	tumor protein p53	0.59567
OC3SNGnh.12857_x_at	MIRN600	microRNA 600			OC3SNGnh.6834_at	TP53			NM_001126117.1	tumor protein p53	0.595111
OCMX.2904.C1_x_at	MIRN548C	microRNA 548c			OC3SNGnh.4528_x_at	TP53		2.04	NM_001126117.1	tumor protein p53	0.593329
OCMX.8490.C1_at	MIRN139	microRNA 139		1.55	OCMX.4067.C1_x_at	TP53			NM_001126117.1	tumor protein p53	0.592662
OC3SNGnh.6784_at	MIRN33A	microRNA 33a		1.52	OCMX.7434.C1_at	TP53			NM_001126115.1	tumor protein p53	0.591366
OC3SNGnh.14278_at	MIRN339	microRNA 339		1.64	OC3SNGnh.6834_at	TP53			NM_001126117.1	tumor protein p53	0.591323
OCMXSNG.4409_at	MIRN7-1	microRNA 7-1		1.78	OCEM.2100_at	TP53			NM_001126117.1	tumor protein p53	0.591272
OC3SNGnh.5613_x_at	GPR162	microRNA 200c		2.05	OCEM.2156_s_at	TP53			NM_001126117.1	tumor protein p53	0.591074
OC3SNGnh.17094_at	MIRN611	microRNA 611		-1.55	OC3SNGnh.4528_x_at	TP53		2.04	NM_001126117.1	tumor protein p53	0.589802
OCRS2.13103_s_at	MIRN124-3	microRNA 124-3			OC3SNGn.3292-20a_s_at	TP53		-2.29	NM_001126117.1	tumor protein p53	0.589694
OC3SNGnh.17053_at	GPR162	microRNA 200c		-1.55	OC3SNGnh.4528_x_at	TP53		2.04	NM_001126117.1	tumor protein p53	0.589088
OCEM.162_at	MIRN592	microRNA 592			OCADNP.12076_x_at	TP53		3.21	NM_001126117.1	tumor protein p53	0.589021
OC3SNGnh.14278_at	MIRN339	microRNA 339		1.64	OCMX.4067.C1_x_at	TP53			NM_001126117.1	tumor protein p53	0.588997
OCRS2.2867_s_at	MIRN198	microRNA 198		1.6	OCEM.2100_x_at	TP53			NM_001126117.1	tumor protein p53	0.585694
OC3SNGnh.696_at	MIRN569	microRNA 569		1.92	OCADNP.12076_x_at	TP53		3.21	NM_001126117.1	tumor protein p53	0.584681
OCRS2.3174_at	MIRN661	microRNA 661		1.54	OCEM.2100_at	TP53			NM_001126117.1	tumor protein p53	0.583504
OCEM.162_at	MIRN592	microRNA 592			OCMX.7434.C1_x_at	TP53		1.51	NM_001126115.1	tumor protein p53	0.58341
OCADNP.18636_s_at	MIRN572	microRNA 572			OCADNP.8578_s_at	TP53			NM_001126117.1	tumor protein p53	0.581884
OCRS2.5576_x_at	MIRN324	microRNA 324			OCEM.2100_at	TP53			NM_001126117.1	tumor protein p53	0.580421
OC3SNGnh.5613_x_at	GPR162	microRNA 200c		2.05	OC3SNGnh.6834_at	TP53			NM_001126117.1	tumor protein p53	0.577601
OCMXSNG.1606_at	MIRN593	microRNA 593			OCHPRC.916_at	TP53			NM_001126117.1	tumor protein p53	0.577253
OCRS2.13103_s_at	MIRN124-3	microRNA 124-3			OCEM.2100_x_at	TP53			NM_001126117.1	tumor protein p53	0.576261
OC3SNGnh.4055_at	MIRN103-2	microRNA 103-2		2.04	OCMX.7434.C1_at	TP53			NM_001126115.1	tumor protein p53	0.576193
OCEM.162_at	MIRN592	microRNA 592			OCEM.2156_s_at	TP53			NM_001126117.1	tumor protein p53	0.575746
OCRS2.13103_s_at	MIRN124-3	microRNA 124-3			OCEM.2100_at	TP53			NM_001126117.1	tumor protein p53	0.57569
OC3SNGnh.16061_x_at	MIRN604	microRNA 604			OC3SNGnh.6834_at	TP53			NM_001126117.1	tumor protein p53	0.574893
OCRS2.551_x_at	MIRN129-1	microRNA 129-1			OCADNP.12076_x_at	TP53		3.21	NM_001126117.1	tumor protein p53	0.573732
OC3SNGnh.10216_x_at	MIRN548A2	microRNA 548a-2	-1.5706	2.12	OCEM.2100_at	TP53			NM_001126117.1	tumor protein p53	0.572832
OC3SNGnh.14368_at	MIRN614	microRNA 614		-1.76	OCEM.2156_s_at	TP53			NM_001126117.1	tumor protein p53	0.569758
OC3SNGnh.127_x_at	C1orf226	microRNA 556			OCADNP.8578_s_at	TP53			NM_001126117.1	tumor protein p53	0.568806
OC3SNGnh.14831_at	MIRN582	microRNA 582		2.31	OCMX.4067.C1_x_at	TP53			NM_001126117.1	tumor protein p53	0.568516
OC3SNGnh.8370_at	MIRN138-2	microRNA 138-2			OCADNP.8578_s_at	TP53			NM_001126117.1	tumor protein p53	0.568492
OC3SNGnh.14368_at	MIRN614	microRNA 614		-1.76	OCEM.1388_x_at	TP53			NM_001126117.1	tumor protein p53	0.568437
OC3SNGnh.10536_at	MIRN101-1	microRNA 101-1		1.63	OCADNP.12076_x_at	TP53		3.21	NM_001126117.1	tumor protein p53	0.56824
OCADNP.13786_s_at	MIRN301B	microRNA 301b	-1.50238		OC3SNGn.3292-20a_s_at	TP53		-2.29	NM_001126117.1	tumor protein p53	0.568016
OC3P.3864.C1_x_at	MIRN555	microRNA 555		1.56	OCADNP.8578_s_at	TP53			NM_001126117.1	tumor protein p53	0.567955
OC3SNGnh.13337_x_at	MIRN7-3	microRNA 7-3	2.10284		OCEM.2156_s_at	TP53			NM_001126117.1	tumor protein p53	0.567346
OC3SNGnh.14278_at	MIRN339	microRNA 339		1.64	OCEM.2100_at	TP53			NM_001126117.1	tumor protein p53	0.565204
OC3SNGnh.2542_at	MIRN103-1	microRNA 103-1		1.94	OC3SNGnh.6834_at	TP53			NM_001126117.1	tumor protein p53	0.56452
OCRS2.3174_at	MIRN661	microRNA 661		1.54	OCADNP.12076_x_at	TP53		3.21	NM_001126117.1	tumor protein p53	0.564027
OCADNP.18636_s_at	MIRN572	microRNA 572			OCHPRC.916_at	TP53			NM_001126117.1	tumor protein p53	0.563719
OC3SNGnh.13337_x_at	MIRN7-3	microRNA 7-3	2.10284		OCMX.7434.C1_x_at	TP53		1.51	NM_001126115.1	tumor protein p53	0.562215
OC3SNGnh.14547_x_at	MIRN345	microRNA 345			OCEM.2156_s_at	TP53			NM_001126117.1	tumor protein p53	0.560924
OCRS2.5520_s_at	MIRN659	microRNA 659			OCMX.4067.C1_x_at	TP53			NM_001126117.1	tumor protein p53	0.560714
OC3SNGnh.2542_at	MIRN103-1	microRNA 103-1		1.94	OC3SNGn.3292-20a_s_at	TP53		-2.29	NM_001126117.1	tumor protein p53	0.560604
OC3P.3864.C1_at	MIRN555	microRNA 555		-1.5	OCMX.4067.C1_x_at	TP53			NM_001126117.1	tumor protein p53	0.55898
OCRS2.551_x_at	MIRN129-1	microRNA 129-1			OCADNP.8578_s_at	TP53			NM_001126117.1	tumor protein p53	0.557373
OCRS2.551_x_at	MIRN129-1	microRNA 129-1			OCMX.4067.C1_x_at	TP53			NM_001126117.1	tumor protein p53	0.556415
OC3P.3864.C1_x_at	MIRN555	microRNA 555		1.56	OCHPRC.916_at	TP53			NM_001126117.1	tumor protein p53	0.5556
OC3SNGnh.14117_at	MIRN557	microRNA 557			OCMX.7434.C1_at	TP53			NM_001126115.1	tumor protein p53	0.554098
OC3SNGnh.10536_at	MIRN101-1	microRNA 101-1		1.63	OC3SNGn.3292-20a_s_at	TP53		-2.29	NM_001126117.1	tumor protein p53	0.552936
OCMX.2899.C1_at	MIRN210	microRNA 210		1.76	OCEM.2100_at	TP53			NM_001126117.1	tumor protein p53	0.552889
OCRS2.3174_at	MIRN661	microRNA 661		1.54	OCMX.4067.C1_x_at	TP53			NM_001126117.1	tumor protein p53	0.552588
OCMXSNG.4688_x_at	MIRN564	microRNA 564			OCEM.1388_x_at	TP53			NM_001126117.1	tumor protein p53	0.551375
OC3P.12763.C1_x_at	MIRN151	microRNA 151		1.74	OCMX.7434.C1_at	TP53			NM_001126115.1	tumor protein p53	0.550918
OC3SNGnh.5613_x_at	GPR162	microRNA 200c		2.05	OC3SNGn.3292-20a_s_at	TP53		-2.29	NM_001126117.1	tumor protein p53	0.550514
OCMX.2899.C1_at	MIRN210	microRNA 210		1.76	OC3SNGnh.6834_at	TP53			NM_001126117.1	tumor protein p53	0.549458
OC3SNGnh.17053_at	GPR162	microRNA 200c		-1.55	OC3SNGnh.6834_at	TP53			NM_001126117.1	tumor protein p53	0.548264
OCMX.2904.C1_x_at	MIRN548C	microRNA 548c			OCEM.2156_s_at	TP53			NM_001126117.1	tumor protein p53	0.547863
OC3SNGnh.696_at	MIRN569	microRNA 569		1.92	OC3SNGnh.4528_x_at	TP53		2.04	NM_001126117.1	tumor protein p53	0.547709
OC3SNGnh.10536_at	MIRN101-1	microRNA 101-1		1.63	OCADNP.8578_s_at	TP53			NM_001126117.1	tumor protein p53	0.545567
OC3SNGnh.7186_x_at	MIRN628	microRNA 628		1.55	OCEM.2100_at	TP53			NM_001126117.1	tumor protein p53	0.543134
OC3P.3864.C1_at	MIRN555	microRNA 555		-1.5	OC3SNGnh.4528_x_at	TP53		2.04	NM_001126117.1	tumor protein p53	0.540902
OC3SNGnh.16061_x_at	MIRN604	microRNA 604			OCHPRC.916_at	TP53			NM_001126117.1	tumor protein p53	0.537928
OC3SNGnh.331_at	MIRN597	microRNA 597			OC3SNGnh.6834_at	TP53			NM_001126117.1	tumor protein p53	0.536215
OCADNP.15201_s_at	MIRN661	microRNA 661		-1.86	OC3SNGnh.6834_at	TP53			NM_001126117.1	tumor protein p53	0.535148
OC3SNGnh.13214_at	MIRN101-2	microRNA 101-2	1.95404	-1.79	OCHPRC.916_at	TP53			NM_001126117.1	tumor protein p53	0.533074
OC3P.3864.C1_x_at	MIRN555	microRNA 555		1.56	OCEM.2100_x_at	TP53			NM_001126117.1	tumor protein p53	0.53277
OCMX.2899.C1_at	MIRN210	microRNA 210		1.76	OCADNP.12076_x_at	TP53		3.21	NM_001126117.1	tumor protein p53	0.532114
OC3SNGnh.10216_x_at	MIRN548A2	microRNA 548a-2	-1.5706	2.12	OCHPRC.916_at	TP53			NM_001126117.1	tumor protein p53	0.53131
OC3SNGnh.130_s_at	MIRN93	microRNA 93		1.64	OC3SNGnh.6834_at	TP53			NM_001126117.1	tumor protein p53	0.53058
OC3SNGnh.696_at	MIRN569	microRNA 569		1.92	OCEM.2156_s_at	TP53			NM_001126117.1	tumor protein p53	0.530031
OC3SNGnh.130_s_at	MIRN93	microRNA 93		1.64	OCADNP.12076_x_at	TP53		3.21	NM_001126117.1	tumor protein p53	0.528406
OCMX.3940.C1_at	MIRN625	microRNA 625		1.51	OCMX.7434.C1_at	TP53			NM_001126115.1	tumor protein p53	0.526257
OCMXSNG.4409_at	MIRN7-1	microRNA 7-1		1.78	OCHPRC.916_at	TP53			NM_001126117.1	tumor protein p53	0.525847
OC3SNGnh.7187_at	MIRN554	microRNA 554		1.76	OCADNP.8578_s_at	TP53			NM_001126117.1	tumor protein p53	0.524013
OCMX.8490.C1_at	MIRN139	microRNA 139		1.55	OCADNP.12076_x_at	TP53		3.21	NM_001126117.1	tumor protein p53	0.523765
OCMXSNG.1606_at	MIRN593	microRNA 593			OCEM.2156_s_at	TP53			NM_001126117.1	tumor protein p53	0.521064
OCMXSNG.1606_at	MIRN593	microRNA 593			OCEM.1388_x_at	TP53			NM_001126117.1	tumor protein p53	0.520558
OC3SNGnh.127_x_at	C1orf226	microRNA 556			OC3SNGnh.4528_x_at	TP53		2.04	NM_001126117.1	tumor protein p53	0.519928
OC3SNGnh.15682_x_at	MIRN199B	microRNA 199b	1.96522		OCMX.7434.C1_x_at	TP53		1.51	NM_001126115.1	tumor protein p53	0.519506
OCADNP.1035_s_at	MIRN659	microRNA 659		-1.54	OCEM.2156_s_at	TP53			NM_001126117.1	tumor protein p53	0.518453
OC3SNGnh.16592_x_at	MIRN425	microRNA 425			OCMX.7434.C1_x_at	TP53		1.51	NM_001126115.1	tumor protein p53	0.516896
OCMX.12017.C1_at	MIRN146B	microRNA 146b			OCEM.1388_at	TP53			NM_001126117.1	tumor protein p53	0.515768
OCRS2.5520_s_at	MIRN659	microRNA 659			OCADNP.12076_x_at	TP53		3.21	NM_001126117.1	tumor protein p53	0.512697
OCUTR.226_x_at	MIRN301B	microRNA 301b		1.55	OC3SNGn.3292-20a_s_at	TP53		-2.29	NM_001126117.1	tumor protein p53	0.512103
OCMX.12017.C1_at	MIRN146B	microRNA 146b			OCMX.7434.C1_x_at	TP53		1.51	NM_001126115.1	tumor protein p53	0.510123
OC3SNGnh.13337_x_at	MIRN7-3	microRNA 7-3	2.10284		OCEM.2100_at	TP53			NM_001126117.1	tumor protein p53	0.50866
OC3SNGnh.8263_at	MIRN449B	microRNA 449b			OCEM.2100_at	TP53			NM_001126117.1	tumor protein p53	0.508604
OC3SNGnh.14117_at	MIRN557	microRNA 557			OCEM.1388_at	TP53			NM_001126117.1	tumor protein p53	0.50851
OC3SNGnh.17336_x_at	MIRN559	microRNA 559			OCMX.7434.C1_at	TP53			NM_001126115.1	tumor protein p53	0.507288
OC3SNGnh.10536_at	MIRN101-1	microRNA 101-1		1.63	OCEM.1388_x_at	TP53			NM_001126117.1	tumor protein p53	0.50675
OCMXSNG.4688_x_at	MIRN564	microRNA 564			OCHPRC.916_at	TP53			NM_001126117.1	tumor protein p53	0.506098
OC3SNGnh.8192_at	MIRN581	microRNA 581		1.53	OCADNP.8578_s_at	TP53			NM_001126117.1	tumor protein p53	0.503159
OCRS2.13103_s_at	MIRN124-3	microRNA 124-3			OCEM.1388_x_at	TP53			NM_001126117.1	tumor protein p53	0.502549
OC3SNGnh.11550_at	MIRN29C	microRNA 29c		1.55	OCMX.7434.C1_x_at	TP53		1.51	NM_001126115.1	tumor protein p53	0.501967
OC3SNGnh.696_at	MIRN569	microRNA 569		1.92	OC3SNGnh.6834_at	TP53			NM_001126117.1	tumor protein p53	0.500574
OC3SNGnh.13689_x_at	MIRN642	microRNA 642	-1.55694		OCEM.1388_x_at	TP53			NM_001126117.1	tumor protein p53	0.500192
OC3SNGnh.2542_at	MIRN103-1	microRNA 103-1		1.94	OCEM.2100_x_at	TP53			NM_001126117.1	tumor protein p53	0.500027
OC3SNGnh.13337_x_at	MIRN7-3	microRNA 7-3	2.10284		OCADNP.12076_x_at	TP53		3.21	NM_001126117.1	tumor protein p53	0.49809
OC3SNGnh.13214_at	MIRN101-2	microRNA 101-2	1.95404	-1.79	OCADNP.8578_s_at	TP53			NM_001126117.1	tumor protein p53	0.496235
OC3P.13017.C1_x_at	MIRN181D	microRNA 181d		1.51	OCEM.2156_s_at	TP53			NM_001126117.1	tumor protein p53	0.492711
OCMX.3940.C1_at	MIRN625	microRNA 625		1.51	OCEM.2100_x_at	TP53			NM_001126117.1	tumor protein p53	0.492403
OC3SNGnh.10536_at	MIRN101-1	microRNA 101-1		1.63	OCEM.2100_at	TP53			NM_001126117.1	tumor protein p53	0.491415
OC3SNGnh.4795_x_at	MIRN573	microRNA 573			OCEM.2100_at	TP53			NM_001126117.1	tumor protein p53	0.490759
OC3P.12763.C1_x_at	MIRN151	microRNA 151		1.74	OCMX.7434.C1_x_at	TP53		1.51	NM_001126115.1	tumor protein p53	0.490338
OCRS2.2867_s_at	MIRN198	microRNA 198		1.6	OC3SNGnh.6834_at	TP53			NM_001126117.1	tumor protein p53	0.487083
OC3SNGnh.17094_at	MIRN611	microRNA 611		-1.55	OCEM.2100_x_at	TP53			NM_001126117.1	tumor protein p53	0.486871
OC3SNGnh.7187_at	MIRN554	microRNA 554		1.76	OCEM.2100_at	TP53			NM_001126117.1	tumor protein p53	0.486565
OC3SNGnh.6784_at	MIRN33A	microRNA 33a		1.52	OCMX.4067.C1_x_at	TP53			NM_001126117.1	tumor protein p53	0.486439
OCADNP.1035_s_at	MIRN659	microRNA 659		-1.54	OCMX.7434.C1_at	TP53			NM_001126115.1	tumor protein p53	0.485821
OC3SNGnh.16168_x_at	MIRN576	microRNA 576		-1.54	OCEM.1388_x_at	TP53			NM_001126117.1	tumor protein p53	0.485156
OC3SNGnh.8263_at	MIRN449B	microRNA 449b			OCEM.1388_at	TP53			NM_001126117.1	tumor protein p53	0.484586
OC3SNGnh.2542_at	MIRN103-1	microRNA 103-1		1.94	OCHPRC.916_at	TP53			NM_001126117.1	tumor protein p53	0.480298
OCMX.3940.C1_at	MIRN625	microRNA 625		1.51	OC3SNGnh.4528_x_at	TP53		2.04	NM_001126117.1	tumor protein p53	0.480089
OC3P.13017.C1_x_at	MIRN181D	microRNA 181d		1.51	OCADNP.12076_x_at	TP53		3.21	NM_001126117.1	tumor protein p53	0.479999
OC3SNGnh.12857_x_at	MIRN600	microRNA 600			OCEM.2100_x_at	TP53			NM_001126117.1	tumor protein p53	0.478592
OC3SNGnh.2220_at	MIRN149	microRNA 149		1.75	OC3SNGnh.6834_at	TP53			NM_001126117.1	tumor protein p53	0.477377
OCMX.12930.C1_at	MIRN22	microRNA 22		1.66	OC3SNGnh.6834_at	TP53			NM_001126117.1	tumor protein p53	0.476572
OC3SNGnh.16061_x_at	MIRN604	microRNA 604			OCEM.2156_s_at	TP53			NM_001126117.1	tumor protein p53	0.475839
OC3SNGnh.14278_at	MIRN339	microRNA 339		1.64	OCADNP.12076_x_at	TP53		3.21	NM_001126117.1	tumor protein p53	0.47544
OC3P.3864.C1_at	MIRN555	microRNA 555		-1.5	OCADNP.12076_x_at	TP53		3.21	NM_001126117.1	tumor protein p53	0.475429
OC3P.11403.C1_s_at	GPR162	microRNA 200c	-1.8663	-1.63	OCEM.1388_x_at	TP53			NM_001126117.1	tumor protein p53	0.471889
OC3SNGnh.16592_x_at	MIRN425	microRNA 425			OC3SNGnh.6834_at	TP53			NM_001126117.1	tumor protein p53	0.471833
OC3SNGnh.17053_at	GPR162	microRNA 200c		-1.55	OCEM.2100_x_at	TP53			NM_001126117.1	tumor protein p53	0.467884
OCMX.6961.C1_at	MIRN30E	microRNA 30e			OC3SNGnh.4528_x_at	TP53		2.04	NM_001126117.1	tumor protein p53	0.46602
OCRS2.551_x_at	MIRN129-1	microRNA 129-1			OC3SNGn.3292-20a_s_at	TP53		-2.29	NM_001126117.1	tumor protein p53	0.465617
OCRS2.11871_at	MIRN633	microRNA 633		1.61	OCEM.2156_s_at	TP53			NM_001126117.1	tumor protein p53	0.465433
OCADNP.15201_s_at	MIRN661	microRNA 661		-1.86	OCEM.1388_x_at	TP53			NM_001126117.1	tumor protein p53	0.462124
OCADNP.13786_s_at	MIRN301B	microRNA 301b	-1.50238		OC3SNGnh.4528_x_at	TP53		2.04	NM_001126117.1	tumor protein p53	0.462022
OCRS2.5576_x_at	MIRN324	microRNA 324			OCADNP.12076_x_at	TP53		3.21	NM_001126117.1	tumor protein p53	0.459703
OC3SNGnh.14547_x_at	MIRN345	microRNA 345			OCMX.4067.C1_x_at	TP53			NM_001126117.1	tumor protein p53	0.459466
OC3SNGnh.17094_at	MIRN611	microRNA 611		-1.55	OCMX.4067.C1_x_at	TP53			NM_001126117.1	tumor protein p53	0.458513
OC3SNGnh.13214_at	MIRN101-2	microRNA 101-2	1.95404	-1.79	OC3SNGn.3292-20a_s_at	TP53		-2.29	NM_001126117.1	tumor protein p53	0.457826
OC3SNGnh.8370_at	MIRN138-2	microRNA 138-2			OCEM.2100_at	TP53			NM_001126117.1	tumor protein p53	0.456295
OCMXSNG.1606_at	MIRN593	microRNA 593			OC3SNGnh.6834_at	TP53			NM_001126117.1	tumor protein p53	0.453621
OCUTR.226_x_at	MIRN301B	microRNA 301b		1.55	OCEM.2100_at	TP53			NM_001126117.1	tumor protein p53	0.451255
OC3SNGnh.10216_x_at	MIRN548A2	microRNA 548a-2	-1.5706	2.12	OCADNP.8578_s_at	TP53			NM_001126117.1	tumor protein p53	0.448716
OC3SNGnh.16061_x_at	MIRN604	microRNA 604			OC3SNGn.3292-20a_s_at	TP53		-2.29	NM_001126117.1	tumor protein p53	0.448224
OCRS2.5576_x_at	MIRN324	microRNA 324			OCHPRC.916_at	TP53			NM_001126117.1	tumor protein p53	0.447534
OC3SNGnh.8370_at	MIRN138-2	microRNA 138-2			OCEM.2100_x_at	TP53			NM_001126117.1	tumor protein p53	0.446699
OC3SNGnh.13689_x_at	MIRN642	microRNA 642	-1.55694		OC3SNGn.3292-20a_s_at	TP53		-2.29	NM_001126117.1	tumor protein p53	0.446552
OC3SNGnh.10536_at	MIRN101-1	microRNA 101-1		1.63	OC3SNGnh.6834_at	TP53			NM_001126117.1	tumor protein p53	0.443747
OC3SNGnh.6784_at	MIRN33A	microRNA 33a		1.52	OCEM.1388_at	TP53			NM_001126117.1	tumor protein p53	0.441355
OC3P.12763.C1_at	MIRN151	microRNA 151			OCMX.7434.C1_at	TP53			NM_001126115.1	tumor protein p53	0.44018
OC3P.13017.C1_x_at	MIRN181D	microRNA 181d		1.51	OCADNP.8578_s_at	TP53			NM_001126117.1	tumor protein p53	0.438588
OCADNP.1035_s_at	MIRN659	microRNA 659		-1.54	OCEM.2100_at	TP53			NM_001126117.1	tumor protein p53	0.438579
OCRS2.11871_at	MIRN633	microRNA 633		1.61	OCADNP.12076_x_at	TP53		3.21	NM_001126117.1	tumor protein p53	0.43826
OC3SNGnh.6176_x_at	MIRN101-1	microRNA 101-1	1.60869		OC3SNGn.3292-20a_s_at	TP53		-2.29	NM_001126117.1	tumor protein p53	0.436024
OCMX.12017.C1_at	MIRN146B	microRNA 146b			OCHPRC.916_at	TP53			NM_001126117.1	tumor protein p53	0.43576
OCUTR.226_x_at	MIRN301B	microRNA 301b		1.55	OCMX.4067.C1_x_at	TP53			NM_001126117.1	tumor protein p53	0.43472
OCMXSNG.4409_at	MIRN7-1	microRNA 7-1		1.78	OCEM.2156_s_at	TP53			NM_001126117.1	tumor protein p53	0.433089
OCMXSNG.4409_at	MIRN7-1	microRNA 7-1		1.78	OCADNP.12076_x_at	TP53		3.21	NM_001126117.1	tumor protein p53	0.432028
OC3P.2409.C1_s_at	MIRN21	microRNA 21		1.86	OC3SNGnh.6834_at	TP53			NM_001126117.1	tumor protein p53	0.430854
OCMX.8490.C1_at	MIRN139	microRNA 139		1.55	OCADNP.8578_s_at	TP53			NM_001126117.1	tumor protein p53	0.42878
OC3SNGnh.13214_at	MIRN101-2	microRNA 101-2	1.95404	-1.79	OCMX.7434.C1_x_at	TP53		1.51	NM_001126115.1	tumor protein p53	0.428016
OC3SNGnh.696_at	MIRN569	microRNA 569		1.92	OCHPRC.916_at	TP53			NM_001126117.1	tumor protein p53	0.426415
OC3SNGnh.13214_at	MIRN101-2	microRNA 101-2	1.95404	-1.79	OCEM.2156_s_at	TP53			NM_001126117.1	tumor protein p53	0.426072
OC3SNGnh.13214_at	MIRN101-2	microRNA 101-2	1.95404	-1.79	OCMX.7434.C1_at	TP53			NM_001126115.1	tumor protein p53	0.425437
OCRS2.3174_at	MIRN661	microRNA 661		1.54	OCMX.7434.C1_at	TP53			NM_001126115.1	tumor protein p53	0.425372
OCMXSNG.4688_x_at	MIRN564	microRNA 564			OC3SNGnh.6834_at	TP53			NM_001126117.1	tumor protein p53	0.424554
OC3P.3864.C1_x_at	MIRN555	microRNA 555		1.56	OCADNP.12076_x_at	TP53		3.21	NM_001126117.1	tumor protein p53	0.424206
OCMX.6115.C1_x_at	MIRN301A	microRNA 301a		-1.6	OCEM.1388_at	TP53			NM_001126117.1	tumor protein p53	0.422749
OCRS2.3174_at	MIRN661	microRNA 661		1.54	OCEM.1388_x_at	TP53			NM_001126117.1	tumor protein p53	0.420793
OCEM.162_at	MIRN592	microRNA 592			OC3SNGnh.4528_x_at	TP53		2.04	NM_001126117.1	tumor protein p53	0.41922
OC3SNGnh.6784_at	MIRN33A	microRNA 33a		1.52	OC3SNGn.3292-20a_s_at	TP53		-2.29	NM_001126117.1	tumor protein p53	0.416449
OC3SNGnh.14368_at	MIRN614	microRNA 614		-1.76	OCADNP.8578_s_at	TP53			NM_001126117.1	tumor protein p53	0.416295
OCRS2.5576_x_at	MIRN324	microRNA 324			OCMX.4067.C1_x_at	TP53			NM_001126117.1	tumor protein p53	0.414499
OCRS2.5576_x_at	MIRN324	microRNA 324			OCEM.2156_s_at	TP53			NM_001126117.1	tumor protein p53	0.413879
OC3SNGnh.7186_x_at	MIRN628	microRNA 628		1.55	OCHPRC.916_at	TP53			NM_001126117.1	tumor protein p53	0.412153
OC3SNGnh.10216_x_at	MIRN548A2	microRNA 548a-2	-1.5706	2.12	OCEM.2100_x_at	TP53			NM_001126117.1	tumor protein p53	0.411405
OCMX.2904.C1_x_at	MIRN548C	microRNA 548c			OCEM.2100_at	TP53			NM_001126117.1	tumor protein p53	0.411388
OC3SNGnh.17094_at	MIRN611	microRNA 611		-1.55	OCEM.1388_x_at	TP53			NM_001126117.1	tumor protein p53	0.404907
OC3SNGnh.10216_x_at	MIRN548A2	microRNA 548a-2	-1.5706	2.12	OCEM.1388_at	TP53			NM_001126117.1	tumor protein p53	0.404886
OC3SNGnh.130_s_at	MIRN93	microRNA 93		1.64	OCEM.2100_x_at	TP53			NM_001126117.1	tumor protein p53	0.401593
OC3P.12763.C1_at	MIRN151	microRNA 151			OCMX.7434.C1_x_at	TP53		1.51	NM_001126115.1	tumor protein p53	0.400038
OC3SNGnh.5613_x_at	GPR162	microRNA 200c		2.05	OCEM.2100_at	TP53			NM_001126117.1	tumor protein p53	0.399959
OC3SNGnh.17094_at	MIRN611	microRNA 611		-1.55	OCEM.1388_at	TP53			NM_001126117.1	tumor protein p53	0.399753
OC3P.3864.C1_at	MIRN555	microRNA 555		-1.5	OCEM.2100_at	TP53			NM_001126117.1	tumor protein p53	0.397559
OCMXSNG.4688_x_at	MIRN564	microRNA 564			OCMX.7434.C1_x_at	TP53		1.51	NM_001126115.1	tumor protein p53	0.397197
OCMX.12930.C1_at	MIRN22	microRNA 22		1.66	OCMX.7434.C1_at	TP53			NM_001126115.1	tumor protein p53	0.396352
OCMX.2904.C1_x_at	MIRN548C	microRNA 548c			OCADNP.12076_x_at	TP53		3.21	NM_001126117.1	tumor protein p53	0.396028
OCRS2.11871_at	MIRN633	microRNA 633		1.61	OCADNP.8578_s_at	TP53			NM_001126117.1	tumor protein p53	0.395989
OC3SNGnh.8263_at	MIRN449B	microRNA 449b			OCEM.1388_x_at	TP53			NM_001126117.1	tumor protein p53	0.394943
OC3SNGnh.18430_at	MIRN566	microRNA 566	-1.63878	1.54	OC3SNGn.3292-20a_s_at	TP53		-2.29	NM_001126117.1	tumor protein p53	0.393869
OCMX.6961.C1_at	MIRN30E	microRNA 30e			OCADNP.8578_s_at	TP53			NM_001126117.1	tumor protein p53	0.393531
OC3SNGnh.16592_x_at	MIRN425	microRNA 425			OCMX.7434.C1_at	TP53			NM_001126115.1	tumor protein p53	0.39173
OC3SNGnh.8263_at	MIRN449B	microRNA 449b			OCEM.2100_x_at	TP53			NM_001126117.1	tumor protein p53	0.390743
OC3P.11403.C1_s_at	GPR162	microRNA 200c	-1.8663	-1.63	OC3SNGnh.4528_x_at	TP53		2.04	NM_001126117.1	tumor protein p53	0.390545
OC3SNGnh.13337_x_at	MIRN7-3	microRNA 7-3	2.10284		OCHPRC.916_at	TP53			NM_001126117.1	tumor protein p53	0.38812
OC3SNGnh.14547_x_at	MIRN345	microRNA 345			OCADNP.8578_s_at	TP53			NM_001126117.1	tumor protein p53	0.387584
OC3P.12763.C1_x_at	MIRN151	microRNA 151		1.74	OCEM.2100_x_at	TP53			NM_001126117.1	tumor protein p53	0.384758
OCMX.8490.C1_at	MIRN139	microRNA 139		1.55	OC3SNGn.3292-20a_s_at	TP53		-2.29	NM_001126117.1	tumor protein p53	0.384418
OCMX.3940.C1_at	MIRN625	microRNA 625		1.51	OCMX.7434.C1_x_at	TP53		1.51	NM_001126115.1	tumor protein p53	0.382623
OCMX.12930.C1_at	MIRN22	microRNA 22		1.66	OCADNP.8578_s_at	TP53			NM_001126117.1	tumor protein p53	0.381774
OC3SNGnh.17053_at	GPR162	microRNA 200c		-1.55	OC3SNGn.3292-20a_s_at	TP53		-2.29	NM_001126117.1	tumor protein p53	0.379734
OC3SNGnh.16267_at	MIRN497	microRNA 497		3.19	OCMX.4067.C1_x_at	TP53			NM_001126117.1	tumor protein p53	0.377262
OCUTR.226_x_at	MIRN301B	microRNA 301b		1.55	OCADNP.8578_s_at	TP53			NM_001126117.1	tumor protein p53	0.377026
OCMXSNG.1606_at	MIRN593	microRNA 593			OCADNP.8578_s_at	TP53			NM_001126117.1	tumor protein p53	0.375831
OC3SNGnh.130_s_at	MIRN93	microRNA 93		1.64	OCMX.7434.C1_at	TP53			NM_001126115.1	tumor protein p53	0.375356
OC3SNGnh.8263_at	MIRN449B	microRNA 449b			OCMX.7434.C1_x_at	TP53		1.51	NM_001126115.1	tumor protein p53	0.374843
OCADNP.15201_s_at	MIRN661	microRNA 661		-1.86	OCEM.2100_at	TP53			NM_001126117.1	tumor protein p53	0.373603
OCMX.12017.C1_at	MIRN146B	microRNA 146b			OCADNP.8578_s_at	TP53			NM_001126117.1	tumor protein p53	0.373359
OC3SNGnh.331_at	MIRN597	microRNA 597			OCHPRC.916_at	TP53			NM_001126117.1	tumor protein p53	0.372114
OC3SNGnh.16713_at	MIRN613	microRNA 613	-2.29079		OC3SNGnh.4528_x_at	TP53		2.04	NM_001126117.1	tumor protein p53	0.369532
OC3SNGnh.16713_at	MIRN613	microRNA 613	-2.29079		OCEM.1388_x_at	TP53			NM_001126117.1	tumor protein p53	0.36898
OC3SNGnh.13214_at	MIRN101-2	microRNA 101-2	1.95404	-1.79	OCEM.2100_at	TP53			NM_001126117.1	tumor protein p53	0.368765
OCMX.2904.C1_x_at	MIRN548C	microRNA 548c			OCHPRC.916_at	TP53			NM_001126117.1	tumor protein p53	0.36777
OC3SNGnh.5421_at	MIRN561	microRNA 561	-2.17845		OCEM.1388_x_at	TP53			NM_001126117.1	tumor protein p53	0.366734
OC3SNGnh.16267_at	MIRN497	microRNA 497		3.19	OCEM.2100_x_at	TP53			NM_001126117.1	tumor protein p53	0.363342
OC3SNGnh.17336_x_at	MIRN559	microRNA 559			OCEM.1388_at	TP53			NM_001126117.1	tumor protein p53	0.363218
OC3SNGnh.13214_at	MIRN101-2	microRNA 101-2	1.95404	-1.79	OCEM.1388_at	TP53			NM_001126117.1	tumor protein p53	0.363089
OC3SNGnh.10216_x_at	MIRN548A2	microRNA 548a-2	-1.5706	2.12	OC3SNGnh.6834_at	TP53			NM_001126117.1	tumor protein p53	0.361837
OCMXSNG.1606_at	MIRN593	microRNA 593			OCEM.2100_x_at	TP53			NM_001126117.1	tumor protein p53	0.360644
OCRS2.2867_s_at	MIRN198	microRNA 198		1.6	OCHPRC.916_at	TP53			NM_001126117.1	tumor protein p53	0.360053
OC3P.3864.C1_at	MIRN555	microRNA 555		-1.5	OC3SNGnh.6834_at	TP53			NM_001126117.1	tumor protein p53	0.358491
OC3SNGnh.16061_x_at	MIRN604	microRNA 604			OCEM.2100_at	TP53			NM_001126117.1	tumor protein p53	0.35791
OC3SNGnh.2220_at	MIRN149	microRNA 149		1.75	OCMX.4067.C1_x_at	TP53			NM_001126117.1	tumor protein p53	0.357814
OC3SNGnh.4795_x_at	MIRN573	microRNA 573			OCMX.4067.C1_x_at	TP53			NM_001126117.1	tumor protein p53	0.357478
OC3SNGnh.11550_at	MIRN29C	microRNA 29c		1.55	OC3SNGn.3292-20a_s_at	TP53		-2.29	NM_001126117.1	tumor protein p53	0.356974
OC3SNGnh.15682_x_at	MIRN199B	microRNA 199b	1.96522		OCEM.2100_at	TP53			NM_001126117.1	tumor protein p53	0.352802
OC3SNGnh.2542_at	MIRN103-1	microRNA 103-1		1.94	OCEM.2156_s_at	TP53			NM_001126117.1	tumor protein p53	0.351384
OCADNP.15201_s_at	MIRN661	microRNA 661		-1.86	OCMX.7434.C1_at	TP53			NM_001126115.1	tumor protein p53	0.350805
OC3SNGnh.14278_at	MIRN339	microRNA 339		1.64	OCADNP.8578_s_at	TP53			NM_001126117.1	tumor protein p53	0.350452
OC3SNGnh.5613_x_at	GPR162	microRNA 200c		2.05	OCMX.4067.C1_x_at	TP53			NM_001126117.1	tumor protein p53	0.35003
OC3SNGnh.17094_at	MIRN611	microRNA 611		-1.55	OCMX.7434.C1_at	TP53			NM_001126115.1	tumor protein p53	0.347158
OC3SNGnh.14278_at	MIRN339	microRNA 339		1.64	OC3SNGn.3292-20a_s_at	TP53		-2.29	NM_001126117.1	tumor protein p53	0.345765
OC3SNGnh.16592_x_at	MIRN425	microRNA 425			OCEM.2100_x_at	TP53			NM_001126117.1	tumor protein p53	0.345319
OC3SNGnh.4795_x_at	MIRN573	microRNA 573			OC3SNGnh.6834_at	TP53			NM_001126117.1	tumor protein p53	0.343649
OC3SNGnh.5613_x_at	GPR162	microRNA 200c		2.05	OCADNP.8578_s_at	TP53			NM_001126117.1	tumor protein p53	0.342266
OCADNP.1035_s_at	MIRN659	microRNA 659		-1.54	OCEM.2100_x_at	TP53			NM_001126117.1	tumor protein p53	0.340201
OC3SNGnh.2220_at	MIRN149	microRNA 149		1.75	OCEM.2100_at	TP53			NM_001126117.1	tumor protein p53	0.340031
OC3SNGnh.4055_at	MIRN103-2	microRNA 103-2		2.04	OCADNP.8578_s_at	TP53			NM_001126117.1	tumor protein p53	0.337621
OCUTR.226_x_at	MIRN301B	microRNA 301b		1.55	OCADNP.12076_x_at	TP53		3.21	NM_001126117.1	tumor protein p53	0.337415
OCMXSNG.4409_at	MIRN7-1	microRNA 7-1		1.78	OCMX.4067.C1_x_at	TP53			NM_001126117.1	tumor protein p53	0.336508
OCMX.12017.C1_at	MIRN146B	microRNA 146b			OCMX.4067.C1_x_at	TP53			NM_001126117.1	tumor protein p53	0.336373
OC3SNGnh.2220_at	MIRN149	microRNA 149		1.75	OCEM.2156_s_at	TP53			NM_001126117.1	tumor protein p53	0.334586
OC3SNGnh.4795_x_at	MIRN573	microRNA 573			OCADNP.12076_x_at	TP53		3.21	NM_001126117.1	tumor protein p53	0.33419
OC3SNGnh.11550_at	MIRN29C	microRNA 29c		1.55	OCMX.7434.C1_at	TP53			NM_001126115.1	tumor protein p53	0.332291
OC3P.3864.C1_at	MIRN555	microRNA 555		-1.5	OCEM.2100_x_at	TP53			NM_001126117.1	tumor protein p53	0.329996
OCMX.12017.C1_at	MIRN146B	microRNA 146b			OCEM.2156_s_at	TP53			NM_001126117.1	tumor protein p53	0.326451
OC3SNGnh.10536_at	MIRN101-1	microRNA 101-1		1.63	OCMX.7434.C1_at	TP53			NM_001126115.1	tumor protein p53	0.32643
OCMXSNG.1606_at	MIRN593	microRNA 593			OCMX.7434.C1_at	TP53			NM_001126115.1	tumor protein p53	0.32631
OCRS2.13103_s_at	MIRN124-3	microRNA 124-3			OCMX.7434.C1_at	TP53			NM_001126115.1	tumor protein p53	0.322455
OCRS2.2867_s_at	MIRN198	microRNA 198		1.6	OC3SNGn.3292-20a_s_at	TP53		-2.29	NM_001126117.1	tumor protein p53	0.320288
OC3SNGnh.2220_at	MIRN149	microRNA 149		1.75	OCHPRC.916_at	TP53			NM_001126117.1	tumor protein p53	0.319669
OC3P.2409.C1_s_at	MIRN21	microRNA 21		1.86	OCEM.2100_at	TP53			NM_001126117.1	tumor protein p53	0.318996
OC3SNGnh.11550_at	MIRN29C	microRNA 29c		1.55	OC3SNGnh.6834_at	TP53			NM_001126117.1	tumor protein p53	0.318495
OC3SNGnh.8370_at	MIRN138-2	microRNA 138-2			OCEM.2156_s_at	TP53			NM_001126117.1	tumor protein p53	0.317239
OC3SNGnh.331_at	MIRN597	microRNA 597			OC3SNGn.3292-20a_s_at	TP53		-2.29	NM_001126117.1	tumor protein p53	0.316409
OCADNP.18636_s_at	MIRN572	microRNA 572			OCMX.4067.C1_x_at	TP53			NM_001126117.1	tumor protein p53	0.315768
OCADNP.15201_s_at	MIRN661	microRNA 661		-1.86	OCEM.2100_x_at	TP53			NM_001126117.1	tumor protein p53	0.314623
OC3SNGnh.14117_at	MIRN557	microRNA 557			OCMX.7434.C1_x_at	TP53		1.51	NM_001126115.1	tumor protein p53	0.314486
OC3SNGnh.10216_x_at	MIRN548A2	microRNA 548a-2	-1.5706	2.12	OCEM.1388_x_at	TP53			NM_001126117.1	tumor protein p53	0.313325
OC3SNGnh.8263_at	MIRN449B	microRNA 449b			OC3SNGn.3292-20a_s_at	TP53		-2.29	NM_001126117.1	tumor protein p53	0.312874
OC3SNGnh.127_x_at	C1orf226	microRNA 556			OCEM.1388_at	TP53			NM_001126117.1	tumor protein p53	0.312343
OCRS2.2867_s_at	MIRN198	microRNA 198		1.6	OCEM.2156_s_at	TP53			NM_001126117.1	tumor protein p53	0.308698
OC3SNGnh.13214_at	MIRN101-2	microRNA 101-2	1.95404	-1.79	OCEM.2100_x_at	TP53			NM_001126117.1	tumor protein p53	0.306241
OC3SNGnh.4795_x_at	MIRN573	microRNA 573			OCEM.2156_s_at	TP53			NM_001126117.1	tumor protein p53	0.304273
OCEM.162_at	MIRN592	microRNA 592			OCEM.2100_x_at	TP53			NM_001126117.1	tumor protein p53	0.299749
OC3SNGnh.7187_at	MIRN554	microRNA 554		1.76	OCADNP.12076_x_at	TP53		3.21	NM_001126117.1	tumor protein p53	0.298296
OC3SNGnh.13214_at	MIRN101-2	microRNA 101-2	1.95404	-1.79	OC3SNGnh.6834_at	TP53			NM_001126117.1	tumor protein p53	0.297582
OC3SNGnh.8532_x_at	MIRN187	microRNA 187			OCMX.7434.C1_at	TP53			NM_001126115.1	tumor protein p53	0.295498
OC3SNGnh.16061_x_at	MIRN604	microRNA 604			OCMX.4067.C1_x_at	TP53			NM_001126117.1	tumor protein p53	0.294608
OCMX.2899.C1_at	MIRN210	microRNA 210		1.76	OCADNP.8578_s_at	TP53			NM_001126117.1	tumor protein p53	0.294571
OCMXSNG.1606_at	MIRN593	microRNA 593			OCMX.4067.C1_x_at	TP53			NM_001126117.1	tumor protein p53	0.294409
OC3P.12763.C1_x_at	MIRN151	microRNA 151		1.74	OC3SNGnh.6834_at	TP53			NM_001126117.1	tumor protein p53	0.292402
OC3SNGnh.17053_at	GPR162	microRNA 200c		-1.55	OCHPRC.916_at	TP53			NM_001126117.1	tumor protein p53	0.292292
OC3SNGnh.4795_x_at	MIRN573	microRNA 573			OC3SNGnh.4528_x_at	TP53		2.04	NM_001126117.1	tumor protein p53	0.290018
OC3SNGnh.331_at	MIRN597	microRNA 597			OCEM.2156_s_at	TP53			NM_001126117.1	tumor protein p53	0.289036
OCMX.2904.C1_x_at	MIRN548C	microRNA 548c			OC3SNGnh.6834_at	TP53			NM_001126117.1	tumor protein p53	0.288742
OCMX.3940.C1_at	MIRN625	microRNA 625		1.51	OC3SNGnh.6834_at	TP53			NM_001126117.1	tumor protein p53	0.287043
OC3SNGnh.331_at	MIRN597	microRNA 597			OCEM.2100_at	TP53			NM_001126117.1	tumor protein p53	0.2863
OCRS2.5520_s_at	MIRN659	microRNA 659			OCADNP.8578_s_at	TP53			NM_001126117.1	tumor protein p53	0.285456
OC3P.13017.C1_x_at	MIRN181D	microRNA 181d		1.51	OCMX.4067.C1_x_at	TP53			NM_001126117.1	tumor protein p53	0.285181
OCADNP.1035_s_at	MIRN659	microRNA 659		-1.54	OCEM.1388_x_at	TP53			NM_001126117.1	tumor protein p53	0.284549
OCEM.162_at	MIRN592	microRNA 592			OCMX.7434.C1_at	TP53			NM_001126115.1	tumor protein p53	0.283991
OCMXSNG.4409_at	MIRN7-1	microRNA 7-1		1.78	OCADNP.8578_s_at	TP53			NM_001126117.1	tumor protein p53	0.281616
OC3SNGnh.17336_x_at	MIRN559	microRNA 559			OCEM.2100_at	TP53			NM_001126117.1	tumor protein p53	0.281289
OC3P.3864.C1_x_at	MIRN555	microRNA 555		1.56	OC3SNGn.3292-20a_s_at	TP53		-2.29	NM_001126117.1	tumor protein p53	0.280981
OC3SNGnh.17053_at	GPR162	microRNA 200c		-1.55	OCEM.2100_at	TP53			NM_001126117.1	tumor protein p53	0.280625
OC3SNGnh.13689_x_at	MIRN642	microRNA 642	-1.55694		OCMX.7434.C1_x_at	TP53		1.51	NM_001126115.1	tumor protein p53	0.275588
OC3SNGnh.12857_x_at	MIRN600	microRNA 600			OCEM.2100_at	TP53			NM_001126117.1	tumor protein p53	0.274162
OC3SNGnh.16713_at	MIRN613	microRNA 613	-2.29079		OC3SNGn.3292-20a_s_at	TP53		-2.29	NM_001126117.1	tumor protein p53	0.273832
OCADNP.15201_s_at	MIRN661	microRNA 661		-1.86	OCADNP.12076_x_at	TP53		3.21	NM_001126117.1	tumor protein p53	0.273246
OC3SNGnh.10216_x_at	MIRN548A2	microRNA 548a-2	-1.5706	2.12	OCMX.7434.C1_x_at	TP53		1.51	NM_001126115.1	tumor protein p53	0.26494
OC3SNGnh.2542_at	MIRN103-1	microRNA 103-1		1.94	OCADNP.8578_s_at	TP53			NM_001126117.1	tumor protein p53	0.261124
OC3P.13017.C1_x_at	MIRN181D	microRNA 181d		1.51	OC3SNGn.3292-20a_s_at	TP53		-2.29	NM_001126117.1	tumor protein p53	0.260861
OC3SNGnh.2542_at	MIRN103-1	microRNA 103-1		1.94	OCEM.2100_at	TP53			NM_001126117.1	tumor protein p53	0.260223
OCADNP.18636_s_at	MIRN572	microRNA 572			OCEM.1388_at	TP53			NM_001126117.1	tumor protein p53	0.259939
OC3SNGnh.7187_at	MIRN554	microRNA 554		1.76	OCMX.4067.C1_x_at	TP53			NM_001126117.1	tumor protein p53	0.259099
OCMXSNG.4688_x_at	MIRN564	microRNA 564			OCEM.2156_s_at	TP53			NM_001126117.1	tumor protein p53	0.258625
OC3SNGnh.14368_at	MIRN614	microRNA 614		-1.76	OCMX.7434.C1_at	TP53			NM_001126115.1	tumor protein p53	0.258575
OC3SNGnh.17336_x_at	MIRN559	microRNA 559			OCEM.2100_x_at	TP53			NM_001126117.1	tumor protein p53	0.257775
OC3P.3864.C1_x_at	MIRN555	microRNA 555		1.56	OCEM.2156_s_at	TP53			NM_001126117.1	tumor protein p53	0.255209
OCEM.162_at	MIRN592	microRNA 592			OCEM.1388_x_at	TP53			NM_001126117.1	tumor protein p53	0.254654
OC3SNGnh.5613_x_at	GPR162	microRNA 200c		2.05	OCADNP.12076_x_at	TP53		3.21	NM_001126117.1	tumor protein p53	0.249299
OC3SNGnh.15682_x_at	MIRN199B	microRNA 199b	1.96522		OC3SNGnh.6834_at	TP53			NM_001126117.1	tumor protein p53	0.246447
OC3SNGnh.16061_x_at	MIRN604	microRNA 604			OCADNP.8578_s_at	TP53			NM_001126117.1	tumor protein p53	0.246419
OCADNP.1035_s_at	MIRN659	microRNA 659		-1.54	OCADNP.12076_x_at	TP53		3.21	NM_001126117.1	tumor protein p53	0.244937
OCRS2.2867_s_at	MIRN198	microRNA 198		1.6	OCEM.2100_at	TP53			NM_001126117.1	tumor protein p53	0.242404
OC3SNGnh.6176_x_at	MIRN101-1	microRNA 101-1	1.60869		OCMX.7434.C1_at	TP53			NM_001126115.1	tumor protein p53	0.238341
OCRS2.11871_at	MIRN633	microRNA 633		1.61	OC3SNGn.3292-20a_s_at	TP53		-2.29	NM_001126117.1	tumor protein p53	0.237957
OCRS2.11871_at	MIRN633	microRNA 633		1.61	OCMX.4067.C1_x_at	TP53			NM_001126117.1	tumor protein p53	0.237862
OC3SNGnh.5421_at	MIRN561	microRNA 561	-2.17845		OC3SNGn.3292-20a_s_at	TP53		-2.29	NM_001126117.1	tumor protein p53	0.236902
OC3SNGnh.14368_at	MIRN614	microRNA 614		-1.76	OC3SNGnh.6834_at	TP53			NM_001126117.1	tumor protein p53	0.235561
OC3SNGnh.4795_x_at	MIRN573	microRNA 573			OCHPRC.916_at	TP53			NM_001126117.1	tumor protein p53	0.233828
OC3SNGnh.11550_at	MIRN29C	microRNA 29c		1.55	OCEM.2100_x_at	TP53			NM_001126117.1	tumor protein p53	0.233371
OCMX.6961.C1_at	MIRN30E	microRNA 30e			OCEM.1388_at	TP53			NM_001126117.1	tumor protein p53	0.23231
OC3P.12763.C1_at	MIRN151	microRNA 151			OCEM.2100_x_at	TP53			NM_001126117.1	tumor protein p53	0.232298
OC3SNGnh.13689_x_at	MIRN642	microRNA 642	-1.55694		OC3SNGnh.6834_at	TP53			NM_001126117.1	tumor protein p53	0.232081
OC3SNGnh.2107_x_at	MIRN552	microRNA 552	-1.61406		OC3SNGnh.4528_x_at	TP53		2.04	NM_001126117.1	tumor protein p53	0.231759
OC3SNGnh.11550_at	MIRN29C	microRNA 29c		1.55	OCEM.1388_x_at	TP53			NM_001126117.1	tumor protein p53	0.229822
OC3SNGnh.7186_x_at	MIRN628	microRNA 628		1.55	OCADNP.12076_x_at	TP53		3.21	NM_001126117.1	tumor protein p53	0.228089
OC3P.3864.C1_x_at	MIRN555	microRNA 555		1.56	OCEM.1388_at	TP53			NM_001126117.1	tumor protein p53	0.226695
OCMX.2899.C1_at	MIRN210	microRNA 210		1.76	OC3SNGn.3292-20a_s_at	TP53		-2.29	NM_001126117.1	tumor protein p53	0.225262
OC3SNGnh.7186_x_at	MIRN628	microRNA 628		1.55	OCADNP.8578_s_at	TP53			NM_001126117.1	tumor protein p53	0.224971
OC3SNGnh.2220_at	MIRN149	microRNA 149		1.75	OCADNP.12076_x_at	TP53		3.21	NM_001126117.1	tumor protein p53	0.22395
OC3SNGnh.13214_at	MIRN101-2	microRNA 101-2	1.95404	-1.79	OCADNP.12076_x_at	TP53		3.21	NM_001126117.1	tumor protein p53	0.221419
OC3SNGnh.18430_at	MIRN566	microRNA 566	-1.63878	1.54	OCMX.7434.C1_x_at	TP53		1.51	NM_001126115.1	tumor protein p53	0.22089
OCUTR.226_x_at	MIRN301B	microRNA 301b		1.55	OCEM.1388_x_at	TP53			NM_001126117.1	tumor protein p53	0.218555
OC3SNGnh.14368_at	MIRN614	microRNA 614		-1.76	OCEM.2100_x_at	TP53			NM_001126117.1	tumor protein p53	0.218167
OC3SNGnh.14368_at	MIRN614	microRNA 614		-1.76	OCMX.4067.C1_x_at	TP53			NM_001126117.1	tumor protein p53	0.217664
OC3SNGnh.13337_x_at	MIRN7-3	microRNA 7-3	2.10284		OC3SNGnh.6834_at	TP53			NM_001126117.1	tumor protein p53	0.21659
OC3P.3864.C1_at	MIRN555	microRNA 555		-1.5	OCEM.1388_at	TP53			NM_001126117.1	tumor protein p53	0.213925
OC3SNGnh.14117_at	MIRN557	microRNA 557			OCHPRC.916_at	TP53			NM_001126117.1	tumor protein p53	0.212767
OC3SNGnh.14117_at	MIRN557	microRNA 557			OCADNP.8578_s_at	TP53			NM_001126117.1	tumor protein p53	0.212724
OCMX.12930.C1_at	MIRN22	microRNA 22		1.66	OCEM.1388_x_at	TP53			NM_001126117.1	tumor protein p53	0.212239
OC3SNGnh.7186_x_at	MIRN628	microRNA 628		1.55	OCEM.2156_s_at	TP53			NM_001126117.1	tumor protein p53	0.210999
OC3SNGnh.14375_x_at	MIRN181B2	microRNA 181b-2		-1.58	OCEM.1388_at	TP53			NM_001126117.1	tumor protein p53	0.210624
OC3SNGnh.8263_at	MIRN449B	microRNA 449b			OC3SNGnh.6834_at	TP53			NM_001126117.1	tumor protein p53	0.210097
OC3SNGnh.15682_x_at	MIRN199B	microRNA 199b	1.96522		OC3SNGnh.4528_x_at	TP53		2.04	NM_001126117.1	tumor protein p53	0.207133
OCADNP.15201_s_at	MIRN661	microRNA 661		-1.86	OCMX.4067.C1_x_at	TP53			NM_001126117.1	tumor protein p53	0.205838
OCADNP.18636_s_at	MIRN572	microRNA 572			OCADNP.12076_x_at	TP53		3.21	NM_001126117.1	tumor protein p53	0.201949
OCRS2.2867_s_at	MIRN198	microRNA 198		1.6	OCMX.4067.C1_x_at	TP53			NM_001126117.1	tumor protein p53	0.201567
OC3SNGnh.16061_x_at	MIRN604	microRNA 604			OCADNP.12076_x_at	TP53		3.21	NM_001126117.1	tumor protein p53	0.201288
OC3SNGnh.13337_x_at	MIRN7-3	microRNA 7-3	2.10284		OC3SNGnh.4528_x_at	TP53		2.04	NM_001126117.1	tumor protein p53	0.200369
OCMXSNG.1606_at	MIRN593	microRNA 593			OCEM.2100_at	TP53			NM_001126117.1	tumor protein p53	0.197452
OC3SNGnh.18430_at	MIRN566	microRNA 566	-1.63878	1.54	OCMX.4067.C1_x_at	TP53			NM_001126117.1	tumor protein p53	0.195651
OCADNP.13786_s_at	MIRN301B	microRNA 301b	-1.50238		OCADNP.8578_s_at	TP53			NM_001126117.1	tumor protein p53	0.188768
OC3P.11403.C1_s_at	GPR162	microRNA 200c	-1.8663	-1.63	OCADNP.8578_s_at	TP53			NM_001126117.1	tumor protein p53	0.188738
OC3SNGnh.16168_x_at	MIRN576	microRNA 576		-1.54	OC3SNGnh.4528_x_at	TP53		2.04	NM_001126117.1	tumor protein p53	0.183525
OC3SNGnh.16592_x_at	MIRN425	microRNA 425			OCHPRC.916_at	TP53			NM_001126117.1	tumor protein p53	0.183089
OC3SNGnh.130_s_at	MIRN93	microRNA 93		1.64	OCADNP.8578_s_at	TP53			NM_001126117.1	tumor protein p53	0.182451
OC3SNGnh.14831_at	MIRN582	microRNA 582		2.31	OCEM.2100_x_at	TP53			NM_001126117.1	tumor protein p53	0.179654
OC3SNGnh.5613_x_at	GPR162	microRNA 200c		2.05	OCEM.1388_x_at	TP53			NM_001126117.1	tumor protein p53	0.178991
OC3SNGnh.16592_x_at	MIRN425	microRNA 425			OC3SNGn.3292-20a_s_at	TP53		-2.29	NM_001126117.1	tumor protein p53	0.176543
OC3SNGnh.17053_at	GPR162	microRNA 200c		-1.55	OCADNP.8578_s_at	TP53			NM_001126117.1	tumor protein p53	0.176265
OC3SNGnh.8192_at	MIRN581	microRNA 581		1.53	OCEM.1388_at	TP53			NM_001126117.1	tumor protein p53	0.17242
OCRS2.5576_x_at	MIRN324	microRNA 324			OCADNP.8578_s_at	TP53			NM_001126117.1	tumor protein p53	0.171352
OC3SNGnh.16592_x_at	MIRN425	microRNA 425			OCEM.2100_at	TP53			NM_001126117.1	tumor protein p53	0.171286
OC3SNGnh.8192_at	MIRN581	microRNA 581		1.53	OC3SNGn.3292-20a_s_at	TP53		-2.29	NM_001126117.1	tumor protein p53	0.169704
OC3SNGnh.7187_at	MIRN554	microRNA 554		1.76	OCEM.1388_x_at	TP53			NM_001126117.1	tumor protein p53	0.168866
OCRS2.5520_s_at	MIRN659	microRNA 659			OC3SNGn.3292-20a_s_at	TP53		-2.29	NM_001126117.1	tumor protein p53	0.167497
OC3SNGnh.6176_x_at	MIRN101-1	microRNA 101-1	1.60869		OCHPRC.916_at	TP53			NM_001126117.1	tumor protein p53	0.166169
OC3SNGnh.17336_x_at	MIRN559	microRNA 559			OC3SNGnh.6834_at	TP53			NM_001126117.1	tumor protein p53	0.165774
OC3P.2409.C1_s_at	MIRN21	microRNA 21		1.86	OCMX.4067.C1_x_at	TP53			NM_001126117.1	tumor protein p53	0.165443
OC3SNGnh.6176_x_at	MIRN101-1	microRNA 101-1	1.60869		OCMX.7434.C1_x_at	TP53		1.51	NM_001126115.1	tumor protein p53	0.161984
OC3SNGnh.2542_at	MIRN103-1	microRNA 103-1		1.94	OCEM.1388_x_at	TP53			NM_001126117.1	tumor protein p53	0.161923
OC3SNGnh.127_x_at	C1orf226	microRNA 556			OC3SNGn.3292-20a_s_at	TP53		-2.29	NM_001126117.1	tumor protein p53	0.155151
OCADNP.18636_s_at	MIRN572	microRNA 572			OCMX.7434.C1_x_at	TP53		1.51	NM_001126115.1	tumor protein p53	0.153006
OC3SNGnh.7186_x_at	MIRN628	microRNA 628		1.55	OC3SNGn.3292-20a_s_at	TP53		-2.29	NM_001126117.1	tumor protein p53	0.152202
OC3SNGnh.14117_at	MIRN557	microRNA 557			OCMX.4067.C1_x_at	TP53			NM_001126117.1	tumor protein p53	0.150489
OC3P.2409.C1_s_at	MIRN21	microRNA 21		1.86	OCHPRC.916_at	TP53			NM_001126117.1	tumor protein p53	0.150453
OC3SNGnh.10216_x_at	MIRN548A2	microRNA 548a-2	-1.5706	2.12	OC3SNGnh.4528_x_at	TP53		2.04	NM_001126117.1	tumor protein p53	0.149046
OC3SNGnh.15682_x_at	MIRN199B	microRNA 199b	1.96522		OCMX.4067.C1_x_at	TP53			NM_001126117.1	tumor protein p53	0.148654
OCMX.3940.C1_at	MIRN625	microRNA 625		1.51	OCEM.2100_at	TP53			NM_001126117.1	tumor protein p53	0.145697
OC3SNGnh.331_at	MIRN597	microRNA 597			OCMX.4067.C1_x_at	TP53			NM_001126117.1	tumor protein p53	0.145216
OCADNP.18636_s_at	MIRN572	microRNA 572			OC3SNGnh.4528_x_at	TP53		2.04	NM_001126117.1	tumor protein p53	0.144349
OC3SNGnh.8370_at	MIRN138-2	microRNA 138-2			OCADNP.12076_x_at	TP53		3.21	NM_001126117.1	tumor protein p53	0.143233
OC3SNGnh.11550_at	MIRN29C	microRNA 29c		1.55	OCHPRC.916_at	TP53			NM_001126117.1	tumor protein p53	0.143061
OC3SNGnh.15682_x_at	MIRN199B	microRNA 199b	1.96522		OCADNP.12076_x_at	TP53		3.21	NM_001126117.1	tumor protein p53	0.140414
OCMXSNG.1606_at	MIRN593	microRNA 593			OCADNP.12076_x_at	TP53		3.21	NM_001126117.1	tumor protein p53	0.140329
OCMX.8490.C1_at	MIRN139	microRNA 139		1.55	OCEM.1388_x_at	TP53			NM_001126117.1	tumor protein p53	0.139657
OC3SNGnh.13689_x_at	MIRN642	microRNA 642	-1.55694		OCHPRC.916_at	TP53			NM_001126117.1	tumor protein p53	0.139057
OC3SNGnh.15682_x_at	MIRN199B	microRNA 199b	1.96522		OCEM.2156_s_at	TP53			NM_001126117.1	tumor protein p53	0.138923
OCMX.2899.C1_at	MIRN210	microRNA 210		1.76	OCEM.1388_x_at	TP53			NM_001126117.1	tumor protein p53	0.13834
OC3P.2409.C1_s_at	MIRN21	microRNA 21		1.86	OCEM.2156_s_at	TP53			NM_001126117.1	tumor protein p53	0.137344
OCEM.162_at	MIRN592	microRNA 592			OCMX.4067.C1_x_at	TP53			NM_001126117.1	tumor protein p53	0.137106
OC3P.12763.C1_at	MIRN151	microRNA 151			OC3SNGnh.6834_at	TP53			NM_001126117.1	tumor protein p53	0.136307
OCRS2.551_x_at	MIRN129-1	microRNA 129-1			OCEM.1388_x_at	TP53			NM_001126117.1	tumor protein p53	0.135894
OCMXSNG.4409_at	MIRN7-1	microRNA 7-1		1.78	OC3SNGn.3292-20a_s_at	TP53		-2.29	NM_001126117.1	tumor protein p53	0.134572
OC3SNGnh.16267_at	MIRN497	microRNA 497		3.19	OCMX.7434.C1_at	TP53			NM_001126115.1	tumor protein p53	0.134159
OCADNP.1035_s_at	MIRN659	microRNA 659		-1.54	OCEM.1388_at	TP53			NM_001126117.1	tumor protein p53	0.132949
OC3SNGnh.16061_x_at	MIRN604	microRNA 604			OCEM.1388_x_at	TP53			NM_001126117.1	tumor protein p53	0.131717
OC3SNGnh.16713_at	MIRN613	microRNA 613	-2.29079		OC3SNGnh.6834_at	TP53			NM_001126117.1	tumor protein p53	0.131404
OC3SNGnh.12857_x_at	MIRN600	microRNA 600			OCHPRC.916_at	TP53			NM_001126117.1	tumor protein p53	0.13105
OC3SNGnh.18430_at	MIRN566	microRNA 566	-1.63878	1.54	OCEM.2156_s_at	TP53			NM_001126117.1	tumor protein p53	0.130159
OC3P.12763.C1_at	MIRN151	microRNA 151			OC3SNGn.3292-20a_s_at	TP53		-2.29	NM_001126117.1	tumor protein p53	0.12986
OC3SNGnh.6176_x_at	MIRN101-1	microRNA 101-1	1.60869		OCEM.2156_s_at	TP53			NM_001126117.1	tumor protein p53	0.123257
OC3SNGnh.6176_x_at	MIRN101-1	microRNA 101-1	1.60869		OCADNP.8578_s_at	TP53			NM_001126117.1	tumor protein p53	0.12213
OC3SNGnh.12857_x_at	MIRN600	microRNA 600			OC3SNGn.3292-20a_s_at	TP53		-2.29	NM_001126117.1	tumor protein p53	0.119788
OC3P.3864.C1_at	MIRN555	microRNA 555		-1.5	OCMX.7434.C1_at	TP53			NM_001126115.1	tumor protein p53	0.116914
OC3P.11403.C1_s_at	GPR162	microRNA 200c	-1.8663	-1.63	OC3SNGnh.6834_at	TP53			NM_001126117.1	tumor protein p53	0.11357
OCMX.12017.C1_at	MIRN146B	microRNA 146b			OC3SNGnh.4528_x_at	TP53		2.04	NM_001126117.1	tumor protein p53	0.110951
OC3SNGnh.16168_x_at	MIRN576	microRNA 576		-1.54	OCADNP.8578_s_at	TP53			NM_001126117.1	tumor protein p53	0.107797
OC3SNGnh.17336_x_at	MIRN559	microRNA 559			OCMX.7434.C1_x_at	TP53		1.51	NM_001126115.1	tumor protein p53	0.107177
OCADNP.15201_s_at	MIRN661	microRNA 661		-1.86	OCEM.1388_at	TP53			NM_001126117.1	tumor protein p53	0.105819
OC3P.2409.C1_s_at	MIRN21	microRNA 21		1.86	OCADNP.12076_x_at	TP53		3.21	NM_001126117.1	tumor protein p53	0.104613
OC3SNGnh.13689_x_at	MIRN642	microRNA 642	-1.55694		OCADNP.8578_s_at	TP53			NM_001126117.1	tumor protein p53	0.104039
OC3SNGnh.15682_x_at	MIRN199B	microRNA 199b	1.96522		OCHPRC.916_at	TP53			NM_001126117.1	tumor protein p53	0.103792
OC3SNGnh.2542_at	MIRN103-1	microRNA 103-1		1.94	OCMX.4067.C1_x_at	TP53			NM_001126117.1	tumor protein p53	0.101408
OC3SNGnh.8263_at	MIRN449B	microRNA 449b			OC3SNGnh.4528_x_at	TP53		2.04	NM_001126117.1	tumor protein p53	0.0993168
OC3SNGnh.16267_at	MIRN497	microRNA 497		3.19	OCADNP.12076_x_at	TP53		3.21	NM_001126117.1	tumor protein p53	0.0965204
OCMX.6115.C1_x_at	MIRN301A	microRNA 301a		-1.6	OCADNP.8578_s_at	TP53			NM_001126117.1	tumor protein p53	0.0960943
OC3SNGnh.13214_at	MIRN101-2	microRNA 101-2	1.95404	-1.79	OC3SNGnh.4528_x_at	TP53		2.04	NM_001126117.1	tumor protein p53	0.0945995
OC3SNGnh.331_at	MIRN597	microRNA 597			OCADNP.8578_s_at	TP53			NM_001126117.1	tumor protein p53	0.0906192
OC3SNGnh.14547_x_at	MIRN345	microRNA 345			OCEM.1388_at	TP53			NM_001126117.1	tumor protein p53	0.0897772
OCMX.12930.C1_at	MIRN22	microRNA 22		1.66	OC3SNGn.3292-20a_s_at	TP53		-2.29	NM_001126117.1	tumor protein p53	0.0889541
OC3SNGnh.14117_at	MIRN557	microRNA 557			OCEM.2156_s_at	TP53			NM_001126117.1	tumor protein p53	0.0881505
OCRS2.13103_s_at	MIRN124-3	microRNA 124-3			OCEM.1388_at	TP53			NM_001126117.1	tumor protein p53	0.0855582
OC3SNGnh.6784_at	MIRN33A	microRNA 33a		1.52	OCEM.1388_x_at	TP53			NM_001126117.1	tumor protein p53	0.0820886
OC3SNGnh.14278_at	MIRN339	microRNA 339		1.64	OCEM.1388_x_at	TP53			NM_001126117.1	tumor protein p53	0.0820342
OCMXSNG.4688_x_at	MIRN564	microRNA 564			OCEM.2100_at	TP53			NM_001126117.1	tumor protein p53	0.080011
OC3SNGnh.16592_x_at	MIRN425	microRNA 425			OCEM.2156_s_at	TP53			NM_001126117.1	tumor protein p53	0.0784698
OC3SNGnh.16592_x_at	MIRN425	microRNA 425			OCEM.1388_x_at	TP53			NM_001126117.1	tumor protein p53	0.0769862
OC3SNGnh.696_at	MIRN569	microRNA 569		1.92	OCADNP.8578_s_at	TP53			NM_001126117.1	tumor protein p53	0.0768421
OC3SNGnh.331_at	MIRN597	microRNA 597			OCADNP.12076_x_at	TP53		3.21	NM_001126117.1	tumor protein p53	0.0766087
OCRS2.2867_s_at	MIRN198	microRNA 198		1.6	OCADNP.12076_x_at	TP53		3.21	NM_001126117.1	tumor protein p53	0.0760097
OC3SNGnh.130_s_at	MIRN93	microRNA 93		1.64	OCMX.7434.C1_x_at	TP53		1.51	NM_001126115.1	tumor protein p53	0.0754715
OC3SNGnh.14831_at	MIRN582	microRNA 582		2.31	OCEM.2156_s_at	TP53			NM_001126117.1	tumor protein p53	0.0737302
OCADNP.13786_s_at	MIRN301B	microRNA 301b	-1.50238		OC3SNGnh.6834_at	TP53			NM_001126117.1	tumor protein p53	0.0728711
OCADNP.13786_s_at	MIRN301B	microRNA 301b	-1.50238		OCHPRC.916_at	TP53			NM_001126117.1	tumor protein p53	0.0714906
OCRS2.2867_s_at	MIRN198	microRNA 198		1.6	OCADNP.8578_s_at	TP53			NM_001126117.1	tumor protein p53	0.0705747
OCMX.3940.C1_at	MIRN625	microRNA 625		1.51	OCMX.4067.C1_x_at	TP53			NM_001126117.1	tumor protein p53	0.068747
OC3SNGnh.11550_at	MIRN29C	microRNA 29c		1.55	OCEM.2156_s_at	TP53			NM_001126117.1	tumor protein p53	0.0677063
OC3SNGnh.14368_at	MIRN614	microRNA 614		-1.76	OCEM.2100_at	TP53			NM_001126117.1	tumor protein p53	0.0649743
OC3SNGnh.14375_x_at	MIRN181B2	microRNA 181b-2		-1.58	OCMX.7434.C1_at	TP53			NM_001126115.1	tumor protein p53	0.0649543
OCMXSNG.4688_x_at	MIRN564	microRNA 564			OCMX.7434.C1_at	TP53			NM_001126115.1	tumor protein p53	0.0644609
OC3SNGnh.130_s_at	MIRN93	microRNA 93		1.64	OCHPRC.916_at	TP53			NM_001126117.1	tumor protein p53	0.0641018
OC3SNGnh.2542_at	MIRN103-1	microRNA 103-1		1.94	OCADNP.12076_x_at	TP53		3.21	NM_001126117.1	tumor protein p53	0.0611371
OCMX.12930.C1_at	MIRN22	microRNA 22		1.66	OCEM.1388_at	TP53			NM_001126117.1	tumor protein p53	0.0608531
OCADNP.18636_s_at	MIRN572	microRNA 572			OCEM.2100_at	TP53			NM_001126117.1	tumor protein p53	0.0593042
OC3SNGnh.17336_x_at	MIRN559	microRNA 559			OCADNP.8578_s_at	TP53			NM_001126117.1	tumor protein p53	0.058419
OC3SNGnh.13689_x_at	MIRN642	microRNA 642	-1.55694		OCEM.2156_s_at	TP53			NM_001126117.1	tumor protein p53	0.058062
OC3SNGnh.8370_at	MIRN138-2	microRNA 138-2			OCEM.1388_at	TP53			NM_001126117.1	tumor protein p53	0.0570429
OCRS2.2867_s_at	MIRN198	microRNA 198		1.6	OCEM.1388_x_at	TP53			NM_001126117.1	tumor protein p53	0.0551897
OC3SNGnh.2220_at	MIRN149	microRNA 149		1.75	OC3SNGn.3292-20a_s_at	TP53		-2.29	NM_001126117.1	tumor protein p53	0.0520221
OC3SNGnh.16592_x_at	MIRN425	microRNA 425			OCMX.4067.C1_x_at	TP53			NM_001126117.1	tumor protein p53	0.0490476
OC3SNGnh.17336_x_at	MIRN559	microRNA 559			OCADNP.12076_x_at	TP53		3.21	NM_001126117.1	tumor protein p53	0.0487057
OC3SNGnh.16592_x_at	MIRN425	microRNA 425			OCADNP.12076_x_at	TP53		3.21	NM_001126117.1	tumor protein p53	0.0472369
OC3SNGnh.16592_x_at	MIRN425	microRNA 425			OCADNP.8578_s_at	TP53			NM_001126117.1	tumor protein p53	0.0469638
OC3SNGnh.17053_at	GPR162	microRNA 200c		-1.55	OCEM.2156_s_at	TP53			NM_001126117.1	tumor protein p53	0.0451293
OC3SNGnh.13214_at	MIRN101-2	microRNA 101-2	1.95404	-1.79	OCMX.4067.C1_x_at	TP53			NM_001126117.1	tumor protein p53	0.0428309
OC3SNGnh.13337_x_at	MIRN7-3	microRNA 7-3	2.10284		OCEM.1388_at	TP53			NM_001126117.1	tumor protein p53	0.0425305
OC3SNGnh.4055_at	MIRN103-2	microRNA 103-2		2.04	OC3SNGn.3292-20a_s_at	TP53		-2.29	NM_001126117.1	tumor protein p53	0.0410943
OCRS2.3174_at	MIRN661	microRNA 661		1.54	OCEM.1388_at	TP53			NM_001126117.1	tumor protein p53	0.0375532
OC3SNGnh.14831_at	MIRN582	microRNA 582		2.31	OCADNP.12076_x_at	TP53		3.21	NM_001126117.1	tumor protein p53	0.0353748
OC3SNGnh.14831_at	MIRN582	microRNA 582		2.31	OCEM.1388_x_at	TP53			NM_001126117.1	tumor protein p53	0.0348206
OC3P.12763.C1_x_at	MIRN151	microRNA 151		1.74	OC3SNGn.3292-20a_s_at	TP53		-2.29	NM_001126117.1	tumor protein p53	0.0331715
OC3SNGnh.14547_x_at	MIRN345	microRNA 345			OC3SNGn.3292-20a_s_at	TP53		-2.29	NM_001126117.1	tumor protein p53	0.0315435
OC3SNGnh.17336_x_at	MIRN559	microRNA 559			OCHPRC.916_at	TP53			NM_001126117.1	tumor protein p53	0.0286557
OC3SNGnh.16713_at	MIRN613	microRNA 613	-2.29079		OCADNP.8578_s_at	TP53			NM_001126117.1	tumor protein p53	0.0250382
OC3SNGnh.13337_x_at	MIRN7-3	microRNA 7-3	2.10284		OCADNP.8578_s_at	TP53			NM_001126117.1	tumor protein p53	0.0248344
OCADNP.1035_s_at	MIRN659	microRNA 659		-1.54	OCMX.4067.C1_x_at	TP53			NM_001126117.1	tumor protein p53	0.0227703
OC3SNGnh.12857_x_at	MIRN600	microRNA 600			OCADNP.8578_s_at	TP53			NM_001126117.1	tumor protein p53	0.0192795
OC3SNGnh.18430_at	MIRN566	microRNA 566	-1.63878	1.54	OCHPRC.916_at	TP53			NM_001126117.1	tumor protein p53	0.0182318
OCRS2.551_x_at	MIRN129-1	microRNA 129-1			OCEM.1388_at	TP53			NM_001126117.1	tumor protein p53	0.0119516
OC3SNGnh.4055_at	MIRN103-2	microRNA 103-2		2.04	OCEM.1388_x_at	TP53			NM_001126117.1	tumor protein p53	0.0114126
OCMXSNG.4688_x_at	MIRN564	microRNA 564			OCEM.1388_at	TP53			NM_001126117.1	tumor protein p53	0.0111473
OC3SNGnh.6176_x_at	MIRN101-1	microRNA 101-1	1.60869		OCEM.1388_at	TP53			NM_001126117.1	tumor protein p53	0.00887743
OCMX.3940.C1_at	MIRN625	microRNA 625		1.51	OCADNP.12076_x_at	TP53		3.21	NM_001126117.1	tumor protein p53	0.00838484
OC3SNGnh.6176_x_at	MIRN101-1	microRNA 101-1	1.60869		OC3SNGnh.4528_x_at	TP53		2.04	NM_001126117.1	tumor protein p53	0.00829742
OC3P.12763.C1_x_at	MIRN151	microRNA 151		1.74	OCEM.2100_at	TP53			NM_001126117.1	tumor protein p53	0.00573635
OC3SNGnh.6176_x_at	MIRN101-1	microRNA 101-1	1.60869		OCEM.2100_x_at	TP53			NM_001126117.1	tumor protein p53	0.00554208
OCADNP.13786_s_at	MIRN301B	microRNA 301b	-1.50238		OCMX.7434.C1_x_at	TP53		1.51	NM_001126115.1	tumor protein p53	0.00453861
OC3SNGnh.14368_at	MIRN614	microRNA 614		-1.76	OCADNP.12076_x_at	TP53		3.21	NM_001126117.1	tumor protein p53	0.00410218
OC3SNGnh.11550_at	MIRN29C	microRNA 29c		1.55	OCMX.4067.C1_x_at	TP53			NM_001126117.1	tumor protein p53	-0.00186074
OC3SNGnh.8263_at	MIRN449B	microRNA 449b			OCMX.7434.C1_at	TP53			NM_001126115.1	tumor protein p53	-0.001979
OC3SNGnh.16267_at	MIRN497	microRNA 497		3.19	OCEM.2100_at	TP53			NM_001126117.1	tumor protein p53	-0.00250502
OCMX.6115.C1_x_at	MIRN301A	microRNA 301a		-1.6	OC3SNGn.3292-20a_s_at	TP53		-2.29	NM_001126117.1	tumor protein p53	-0.00365926
OCMX.6115.C1_x_at	MIRN301A	microRNA 301a		-1.6	OC3SNGnh.6834_at	TP53			NM_001126117.1	tumor protein p53	-0.00579315
OC3SNGnh.7186_x_at	MIRN628	microRNA 628		1.55	OCMX.4067.C1_x_at	TP53			NM_001126117.1	tumor protein p53	-0.00666642
OC3P.13017.C1_x_at	MIRN181D	microRNA 181d		1.51	OCEM.1388_at	TP53			NM_001126117.1	tumor protein p53	-0.00688658
OC3SNGnh.2107_x_at	MIRN552	microRNA 552	-1.61406		OCEM.1388_x_at	TP53			NM_001126117.1	tumor protein p53	-0.00744244
OC3SNGnh.13689_x_at	MIRN642	microRNA 642	-1.55694		OCMX.4067.C1_x_at	TP53			NM_001126117.1	tumor protein p53	-0.00838245
OC3SNGnh.2220_at	MIRN149	microRNA 149		1.75	OCADNP.8578_s_at	TP53			NM_001126117.1	tumor protein p53	-0.0096991
OC3P.11403.C1_s_at	GPR162	microRNA 200c	-1.8663	-1.63	OCHPRC.916_at	TP53			NM_001126117.1	tumor protein p53	-0.0112715
OC3SNGnh.4055_at	MIRN103-2	microRNA 103-2		2.04	OCEM.1388_at	TP53			NM_001126117.1	tumor protein p53	-0.0138417
OCADNP.18636_s_at	MIRN572	microRNA 572			OC3SNGnh.6834_at	TP53			NM_001126117.1	tumor protein p53	-0.0140805
OCRS2.11871_at	MIRN633	microRNA 633		1.61	OCEM.1388_at	TP53			NM_001126117.1	tumor protein p53	-0.0165467
OC3SNGnh.10536_at	MIRN101-1	microRNA 101-1		1.63	OCEM.1388_at	TP53			NM_001126117.1	tumor protein p53	-0.0165973
OC3SNGnh.8532_x_at	MIRN187	microRNA 187			OCEM.1388_at	TP53			NM_001126117.1	tumor protein p53	-0.019733
OC3P.11403.C1_s_at	GPR162	microRNA 200c	-1.8663	-1.63	OCMX.7434.C1_x_at	TP53		1.51	NM_001126115.1	tumor protein p53	-0.0214619
OC3SNGnh.130_s_at	MIRN93	microRNA 93		1.64	OCMX.4067.C1_x_at	TP53			NM_001126117.1	tumor protein p53	-0.022997
OC3SNGnh.11550_at	MIRN29C	microRNA 29c		1.55	OCEM.2100_at	TP53			NM_001126117.1	tumor protein p53	-0.0239931
OC3SNGnh.5421_at	MIRN561	microRNA 561	-2.17845		OC3SNGnh.4528_x_at	TP53		2.04	NM_001126117.1	tumor protein p53	-0.0256555
OC3SNGnh.11550_at	MIRN29C	microRNA 29c		1.55	OCADNP.8578_s_at	TP53			NM_001126117.1	tumor protein p53	-0.0264213
OC3SNGnh.13689_x_at	MIRN642	microRNA 642	-1.55694		OCMX.7434.C1_at	TP53			NM_001126115.1	tumor protein p53	-0.0268183
OC3P.3864.C1_x_at	MIRN555	microRNA 555		1.56	OCMX.4067.C1_x_at	TP53			NM_001126117.1	tumor protein p53	-0.0271412
OC3SNGnh.8532_x_at	MIRN187	microRNA 187			OC3SNGnh.6834_at	TP53			NM_001126117.1	tumor protein p53	-0.0342501
OCMXSNG.4688_x_at	MIRN564	microRNA 564			OCADNP.12076_x_at	TP53		3.21	NM_001126117.1	tumor protein p53	-0.0343439
OCRS2.5576_x_at	MIRN324	microRNA 324			OC3SNGn.3292-20a_s_at	TP53		-2.29	NM_001126117.1	tumor protein p53	-0.034782
OCADNP.13786_s_at	MIRN301B	microRNA 301b	-1.50238		OCEM.2156_s_at	TP53			NM_001126117.1	tumor protein p53	-0.0377124
OC3P.12763.C1_x_at	MIRN151	microRNA 151		1.74	OCHPRC.916_at	TP53			NM_001126117.1	tumor protein p53	-0.0386397
OC3SNGnh.331_at	MIRN597	microRNA 597			OCEM.1388_x_at	TP53			NM_001126117.1	tumor protein p53	-0.0397841
OC3SNGnh.18430_at	MIRN566	microRNA 566	-1.63878	1.54	OCEM.2100_x_at	TP53			NM_001126117.1	tumor protein p53	-0.0441611
OC3SNGnh.6176_x_at	MIRN101-1	microRNA 101-1	1.60869		OCEM.1388_x_at	TP53			NM_001126117.1	tumor protein p53	-0.0442719
OCMX.6961.C1_at	MIRN30E	microRNA 30e			OC3SNGn.3292-20a_s_at	TP53		-2.29	NM_001126117.1	tumor protein p53	-0.0464192
OC3SNGnh.2107_x_at	MIRN552	microRNA 552	-1.61406		OC3SNGn.3292-20a_s_at	TP53		-2.29	NM_001126117.1	tumor protein p53	-0.047596
OC3SNGnh.13689_x_at	MIRN642	microRNA 642	-1.55694		OCEM.2100_x_at	TP53			NM_001126117.1	tumor protein p53	-0.0476697
OC3P.12763.C1_at	MIRN151	microRNA 151			OCEM.1388_x_at	TP53			NM_001126117.1	tumor protein p53	-0.0520874
OC3SNGnh.16713_at	MIRN613	microRNA 613	-2.29079		OCMX.7434.C1_x_at	TP53		1.51	NM_001126115.1	tumor protein p53	-0.0524807
OC3SNGnh.14831_at	MIRN582	microRNA 582		2.31	OC3SNGnh.4528_x_at	TP53		2.04	NM_001126117.1	tumor protein p53	-0.0630812
OC3SNGnh.8370_at	MIRN138-2	microRNA 138-2			OCEM.1388_x_at	TP53			NM_001126117.1	tumor protein p53	-0.0636868
OCRS2.5520_s_at	MIRN659	microRNA 659			OCEM.1388_x_at	TP53			NM_001126117.1	tumor protein p53	-0.0696626
OCMX.2904.C1_x_at	MIRN548C	microRNA 548c			OCADNP.8578_s_at	TP53			NM_001126117.1	tumor protein p53	-0.0717009
OC3SNGnh.16168_x_at	MIRN576	microRNA 576		-1.54	OC3SNGnh.6834_at	TP53			NM_001126117.1	tumor protein p53	-0.0725854
OC3SNGnh.2220_at	MIRN149	microRNA 149		1.75	OCEM.1388_x_at	TP53			NM_001126117.1	tumor protein p53	-0.0728164
OC3SNGnh.12857_x_at	MIRN600	microRNA 600			OCADNP.12076_x_at	TP53		3.21	NM_001126117.1	tumor protein p53	-0.0737518
OC3SNGnh.6176_x_at	MIRN101-1	microRNA 101-1	1.60869		OCEM.2100_at	TP53			NM_001126117.1	tumor protein p53	-0.0766237
OC3SNGnh.127_x_at	C1orf226	microRNA 556			OCEM.1388_x_at	TP53			NM_001126117.1	tumor protein p53	-0.0774838
OC3SNGnh.2107_x_at	MIRN552	microRNA 552	-1.61406		OC3SNGnh.6834_at	TP53			NM_001126117.1	tumor protein p53	-0.0785167
OC3P.12763.C1_x_at	MIRN151	microRNA 151		1.74	OCMX.4067.C1_x_at	TP53			NM_001126117.1	tumor protein p53	-0.0786279
OC3SNGnh.8192_at	MIRN581	microRNA 581		1.53	OCEM.1388_x_at	TP53			NM_001126117.1	tumor protein p53	-0.0797476
OC3SNGnh.2107_x_at	MIRN552	microRNA 552	-1.61406		OCMX.7434.C1_at	TP53			NM_001126115.1	tumor protein p53	-0.0812368
OC3SNGnh.16267_at	MIRN497	microRNA 497		3.19	OCEM.2156_s_at	TP53			NM_001126117.1	tumor protein p53	-0.083579
OC3SNGnh.14117_at	MIRN557	microRNA 557			OC3SNGnh.4528_x_at	TP53		2.04	NM_001126117.1	tumor protein p53	-0.0863198
OC3SNGnh.130_s_at	MIRN93	microRNA 93		1.64	OCEM.2156_s_at	TP53			NM_001126117.1	tumor protein p53	-0.0914727
OC3SNGnh.5421_at	MIRN561	microRNA 561	-2.17845		OCADNP.8578_s_at	TP53			NM_001126117.1	tumor protein p53	-0.0920471
OC3SNGnh.4795_x_at	MIRN573	microRNA 573			OCEM.1388_at	TP53			NM_001126117.1	tumor protein p53	-0.093459
OC3SNGnh.6176_x_at	MIRN101-1	microRNA 101-1	1.60869		OC3SNGnh.6834_at	TP53			NM_001126117.1	tumor protein p53	-0.0944983
OC3SNGnh.13214_at	MIRN101-2	microRNA 101-2	1.95404	-1.79	OCEM.1388_x_at	TP53			NM_001126117.1	tumor protein p53	-0.0962904
OC3SNGnh.696_at	MIRN569	microRNA 569		1.92	OCEM.1388_at	TP53			NM_001126117.1	tumor protein p53	-0.0973751
OC3SNGnh.17336_x_at	MIRN559	microRNA 559			OCEM.2156_s_at	TP53			NM_001126117.1	tumor protein p53	-0.0977331
OC3P.12763.C1_x_at	MIRN151	microRNA 151		1.74	OCEM.2156_s_at	TP53			NM_001126117.1	tumor protein p53	-0.0982056
OC3SNGnh.16267_at	MIRN497	microRNA 497		3.19	OCMX.7434.C1_x_at	TP53		1.51	NM_001126115.1	tumor protein p53	-0.0982881
OC3SNGnh.17053_at	GPR162	microRNA 200c		-1.55	OCADNP.12076_x_at	TP53		3.21	NM_001126117.1	tumor protein p53	-0.0992591
OC3SNGnh.10216_x_at	MIRN548A2	microRNA 548a-2	-1.5706	2.12	OCMX.7434.C1_at	TP53			NM_001126115.1	tumor protein p53	-0.104768
OC3SNGnh.12857_x_at	MIRN600	microRNA 600			OCEM.2156_s_at	TP53			NM_001126117.1	tumor protein p53	-0.106361
OC3SNGnh.4795_x_at	MIRN573	microRNA 573			OCADNP.8578_s_at	TP53			NM_001126117.1	tumor protein p53	-0.108234
OC3SNGnh.13689_x_at	MIRN642	microRNA 642	-1.55694		OCEM.2100_at	TP53			NM_001126117.1	tumor protein p53	-0.108536
OCMXSNG.4688_x_at	MIRN564	microRNA 564			OCEM.2100_x_at	TP53			NM_001126117.1	tumor protein p53	-0.112213
OC3SNGnh.16713_at	MIRN613	microRNA 613	-2.29079		OCHPRC.916_at	TP53			NM_001126117.1	tumor protein p53	-0.113096
OCMX.3940.C1_at	MIRN625	microRNA 625		1.51	OCEM.2156_s_at	TP53			NM_001126117.1	tumor protein p53	-0.113549
OC3SNGnh.14375_x_at	MIRN181B2	microRNA 181b-2		-1.58	OC3SNGnh.6834_at	TP53			NM_001126117.1	tumor protein p53	-0.113891
OCMX.3940.C1_at	MIRN625	microRNA 625		1.51	OCHPRC.916_at	TP53			NM_001126117.1	tumor protein p53	-0.115375
OCMX.8490.C1_at	MIRN139	microRNA 139		1.55	OCEM.1388_at	TP53			NM_001126117.1	tumor protein p53	-0.115711
OC3SNGnh.10216_x_at	MIRN548A2	microRNA 548a-2	-1.5706	2.12	OC3SNGn.3292-20a_s_at	TP53		-2.29	NM_001126117.1	tumor protein p53	-0.116534
OC3SNGnh.18430_at	MIRN566	microRNA 566	-1.63878	1.54	OC3SNGnh.6834_at	TP53			NM_001126117.1	tumor protein p53	-0.118365
OC3SNGnh.18430_at	MIRN566	microRNA 566	-1.63878	1.54	OCMX.7434.C1_at	TP53			NM_001126115.1	tumor protein p53	-0.11839
OC3SNGnh.7186_x_at	MIRN628	microRNA 628		1.55	OCEM.1388_at	TP53			NM_001126117.1	tumor protein p53	-0.119791
OC3SNGnh.7187_at	MIRN554	microRNA 554		1.76	OCEM.1388_at	TP53			NM_001126117.1	tumor protein p53	-0.120444
OCADNP.18636_s_at	MIRN572	microRNA 572			OCEM.2100_x_at	TP53			NM_001126117.1	tumor protein p53	-0.121264
OC3SNGnh.13689_x_at	MIRN642	microRNA 642	-1.55694		OCADNP.12076_x_at	TP53		3.21	NM_001126117.1	tumor protein p53	-0.122129
OCMXSNG.4409_at	MIRN7-1	microRNA 7-1		1.78	OCEM.1388_x_at	TP53			NM_001126117.1	tumor protein p53	-0.126836
OC3P.12763.C1_at	MIRN151	microRNA 151			OCHPRC.916_at	TP53			NM_001126117.1	tumor protein p53	-0.128472
OCMXSNG.4409_at	MIRN7-1	microRNA 7-1		1.78	OCEM.1388_at	TP53			NM_001126117.1	tumor protein p53	-0.136645
OC3SNGnh.8532_x_at	MIRN187	microRNA 187			OCEM.2100_x_at	TP53			NM_001126117.1	tumor protein p53	-0.137539
OC3P.2409.C1_s_at	MIRN21	microRNA 21		1.86	OC3SNGn.3292-20a_s_at	TP53		-2.29	NM_001126117.1	tumor protein p53	-0.139079
OCMX.2904.C1_x_at	MIRN548C	microRNA 548c			OC3SNGn.3292-20a_s_at	TP53		-2.29	NM_001126117.1	tumor protein p53	-0.140266
OCMX.2904.C1_x_at	MIRN548C	microRNA 548c			OCEM.1388_x_at	TP53			NM_001126117.1	tumor protein p53	-0.144801
OC3P.13017.C1_x_at	MIRN181D	microRNA 181d		1.51	OCEM.1388_x_at	TP53			NM_001126117.1	tumor protein p53	-0.145487
OCRS2.5520_s_at	MIRN659	microRNA 659			OCEM.1388_at	TP53			NM_001126117.1	tumor protein p53	-0.146529
OC3SNGnh.11550_at	MIRN29C	microRNA 29c		1.55	OCADNP.12076_x_at	TP53		3.21	NM_001126117.1	tumor protein p53	-0.14689
OC3SNGnh.15682_x_at	MIRN199B	microRNA 199b	1.96522		OCEM.1388_at	TP53			NM_001126117.1	tumor protein p53	-0.147062
OC3SNGnh.8532_x_at	MIRN187	microRNA 187			OCEM.2100_at	TP53			NM_001126117.1	tumor protein p53	-0.149597
OC3SNGnh.16168_x_at	MIRN576	microRNA 576		-1.54	OCHPRC.916_at	TP53			NM_001126117.1	tumor protein p53	-0.153309
OC3SNGnh.14375_x_at	MIRN181B2	microRNA 181b-2		-1.58	OCEM.2100_at	TP53			NM_001126117.1	tumor protein p53	-0.154627
OCMX.6115.C1_x_at	MIRN301A	microRNA 301a		-1.6	OCEM.2100_at	TP53			NM_001126117.1	tumor protein p53	-0.154993
OCRS2.5576_x_at	MIRN324	microRNA 324			OCEM.1388_at	TP53			NM_001126117.1	tumor protein p53	-0.155241
OC3SNGnh.14831_at	MIRN582	microRNA 582		2.31	OCMX.7434.C1_x_at	TP53		1.51	NM_001126115.1	tumor protein p53	-0.155341
OC3P.12763.C1_at	MIRN151	microRNA 151			OCMX.4067.C1_x_at	TP53			NM_001126117.1	tumor protein p53	-0.156252
OCADNP.13786_s_at	MIRN301B	microRNA 301b	-1.50238		OCMX.4067.C1_x_at	TP53			NM_001126117.1	tumor protein p53	-0.157989
OC3SNGnh.8370_at	MIRN138-2	microRNA 138-2			OCMX.4067.C1_x_at	TP53			NM_001126117.1	tumor protein p53	-0.15977
OC3P.12763.C1_x_at	MIRN151	microRNA 151		1.74	OCEM.1388_x_at	TP53			NM_001126117.1	tumor protein p53	-0.166458
OC3P.12763.C1_at	MIRN151	microRNA 151			OCEM.2156_s_at	TP53			NM_001126117.1	tumor protein p53	-0.167301
OC3SNGnh.14278_at	MIRN339	microRNA 339		1.64	OCEM.1388_at	TP53			NM_001126117.1	tumor protein p53	-0.168664
OC3P.2409.C1_s_at	MIRN21	microRNA 21		1.86	OCADNP.8578_s_at	TP53			NM_001126117.1	tumor protein p53	-0.17605
OC3P.3864.C1_x_at	MIRN555	microRNA 555		1.56	OCEM.1388_x_at	TP53			NM_001126117.1	tumor protein p53	-0.17872
OC3SNGnh.5421_at	MIRN561	microRNA 561	-2.17845		OC3SNGnh.6834_at	TP53			NM_001126117.1	tumor protein p53	-0.179843
OC3SNGnh.17336_x_at	MIRN559	microRNA 559			OC3SNGn.3292-20a_s_at	TP53		-2.29	NM_001126117.1	tumor protein p53	-0.180528
OC3SNGnh.17053_at	GPR162	microRNA 200c		-1.55	OCEM.1388_at	TP53			NM_001126117.1	tumor protein p53	-0.180817
OC3SNGnh.6176_x_at	MIRN101-1	microRNA 101-1	1.60869		OCMX.4067.C1_x_at	TP53			NM_001126117.1	tumor protein p53	-0.181319
OC3SNGnh.18430_at	MIRN566	microRNA 566	-1.63878	1.54	OCADNP.8578_s_at	TP53			NM_001126117.1	tumor protein p53	-0.182272
OC3P.12763.C1_at	MIRN151	microRNA 151			OCEM.2100_at	TP53			NM_001126117.1	tumor protein p53	-0.182442
OCMX.6115.C1_x_at	MIRN301A	microRNA 301a		-1.6	OCMX.7434.C1_at	TP53			NM_001126115.1	tumor protein p53	-0.18271
OCMXSNG.4688_x_at	MIRN564	microRNA 564			OCMX.4067.C1_x_at	TP53			NM_001126117.1	tumor protein p53	-0.184614
OCMX.2899.C1_at	MIRN210	microRNA 210		1.76	OCEM.1388_at	TP53			NM_001126117.1	tumor protein p53	-0.185329
OC3SNGnh.14831_at	MIRN582	microRNA 582		2.31	OCMX.7434.C1_at	TP53			NM_001126115.1	tumor protein p53	-0.187989
OC3SNGnh.2107_x_at	MIRN552	microRNA 552	-1.61406		OCMX.7434.C1_x_at	TP53		1.51	NM_001126115.1	tumor protein p53	-0.188303
OCRS2.5576_x_at	MIRN324	microRNA 324			OCEM.1388_x_at	TP53			NM_001126117.1	tumor protein p53	-0.188536
OC3P.12763.C1_x_at	MIRN151	microRNA 151		1.74	OCADNP.12076_x_at	TP53		3.21	NM_001126117.1	tumor protein p53	-0.19396
OC3SNGnh.15682_x_at	MIRN199B	microRNA 199b	1.96522		OCADNP.8578_s_at	TP53			NM_001126117.1	tumor protein p53	-0.197425
OC3SNGnh.5421_at	MIRN561	microRNA 561	-2.17845		OCEM.1388_at	TP53			NM_001126117.1	tumor protein p53	-0.203649
OC3P.11403.C1_s_at	GPR162	microRNA 200c	-1.8663	-1.63	OCMX.7434.C1_at	TP53			NM_001126115.1	tumor protein p53	-0.208304
OC3SNGnh.14831_at	MIRN582	microRNA 582		2.31	OCEM.2100_at	TP53			NM_001126117.1	tumor protein p53	-0.211778
OC3SNGnh.16168_x_at	MIRN576	microRNA 576		-1.54	OCEM.1388_at	TP53			NM_001126117.1	tumor protein p53	-0.213711
OC3SNGnh.696_at	MIRN569	microRNA 569		1.92	OCEM.1388_x_at	TP53			NM_001126117.1	tumor protein p53	-0.215437
OC3SNGnh.6176_x_at	MIRN101-1	microRNA 101-1	1.60869		OCADNP.12076_x_at	TP53		3.21	NM_001126117.1	tumor protein p53	-0.216993
OC3SNGnh.16267_at	MIRN497	microRNA 497		3.19	OC3SNGnh.4528_x_at	TP53		2.04	NM_001126117.1	tumor protein p53	-0.221052
OCADNP.13786_s_at	MIRN301B	microRNA 301b	-1.50238		OCADNP.12076_x_at	TP53		3.21	NM_001126117.1	tumor protein p53	-0.223577
OC3SNGnh.16713_at	MIRN613	microRNA 613	-2.29079		OCMX.7434.C1_at	TP53			NM_001126115.1	tumor protein p53	-0.223716
OC3SNGnh.16713_at	MIRN613	microRNA 613	-2.29079		OCEM.2100_at	TP53			NM_001126117.1	tumor protein p53	-0.228687
OC3SNGnh.16168_x_at	MIRN576	microRNA 576		-1.54	OCMX.7434.C1_x_at	TP53		1.51	NM_001126115.1	tumor protein p53	-0.234722
OC3P.11403.C1_s_at	GPR162	microRNA 200c	-1.8663	-1.63	OCEM.2156_s_at	TP53			NM_001126117.1	tumor protein p53	-0.241911
OC3SNGnh.696_at	MIRN569	microRNA 569		1.92	OC3SNGn.3292-20a_s_at	TP53		-2.29	NM_001126117.1	tumor protein p53	-0.243118
OC3P.11403.C1_s_at	GPR162	microRNA 200c	-1.8663	-1.63	OCEM.1388_at	TP53			NM_001126117.1	tumor protein p53	-0.243329
OC3SNGnh.13337_x_at	MIRN7-3	microRNA 7-3	2.10284		OC3SNGn.3292-20a_s_at	TP53		-2.29	NM_001126117.1	tumor protein p53	-0.244904
OC3SNGnh.16713_at	MIRN613	microRNA 613	-2.29079		OCADNP.12076_x_at	TP53		3.21	NM_001126117.1	tumor protein p53	-0.248884
OCRS2.11871_at	MIRN633	microRNA 633		1.61	OCEM.1388_x_at	TP53			NM_001126117.1	tumor protein p53	-0.254678
OC3SNGnh.16267_at	MIRN497	microRNA 497		3.19	OCEM.1388_at	TP53			NM_001126117.1	tumor protein p53	-0.256906
OC3SNGnh.14547_x_at	MIRN345	microRNA 345			OCEM.1388_x_at	TP53			NM_001126117.1	tumor protein p53	-0.258089
OC3SNGnh.16713_at	MIRN613	microRNA 613	-2.29079		OCEM.2156_s_at	TP53			NM_001126117.1	tumor protein p53	-0.260484
OCUTR.226_x_at	MIRN301B	microRNA 301b		1.55	OCEM.1388_at	TP53			NM_001126117.1	tumor protein p53	-0.261081
OC3P.12763.C1_x_at	MIRN151	microRNA 151		1.74	OCADNP.8578_s_at	TP53			NM_001126117.1	tumor protein p53	-0.264097
OCADNP.13786_s_at	MIRN301B	microRNA 301b	-1.50238		OCEM.2100_at	TP53			NM_001126117.1	tumor protein p53	-0.266
OC3SNGnh.18430_at	MIRN566	microRNA 566	-1.63878	1.54	OCADNP.12076_x_at	TP53		3.21	NM_001126117.1	tumor protein p53	-0.266934
OC3SNGnh.14368_at	MIRN614	microRNA 614		-1.76	OCEM.1388_at	TP53			NM_001126117.1	tumor protein p53	-0.27034
OCMX.6961.C1_at	MIRN30E	microRNA 30e			OCEM.1388_x_at	TP53			NM_001126117.1	tumor protein p53	-0.270461
OCADNP.18636_s_at	MIRN572	microRNA 572			OCMX.7434.C1_at	TP53			NM_001126115.1	tumor protein p53	-0.273248
OC3SNGnh.17336_x_at	MIRN559	microRNA 559			OCMX.4067.C1_x_at	TP53			NM_001126117.1	tumor protein p53	-0.275344
OCADNP.13786_s_at	MIRN301B	microRNA 301b	-1.50238		OCEM.1388_at	TP53			NM_001126117.1	tumor protein p53	-0.277996
OC3SNGnh.16267_at	MIRN497	microRNA 497		3.19	OC3SNGnh.6834_at	TP53			NM_001126117.1	tumor protein p53	-0.285079
OC3SNGnh.16713_at	MIRN613	microRNA 613	-2.29079		OCEM.1388_at	TP53			NM_001126117.1	tumor protein p53	-0.289331
OC3SNGnh.16713_at	MIRN613	microRNA 613	-2.29079		OCMX.4067.C1_x_at	TP53			NM_001126117.1	tumor protein p53	-0.291012
OC3SNGnh.12857_x_at	MIRN600	microRNA 600			OCEM.1388_at	TP53			NM_001126117.1	tumor protein p53	-0.293041
OC3SNGnh.12857_x_at	MIRN600	microRNA 600			OCMX.4067.C1_x_at	TP53			NM_001126117.1	tumor protein p53	-0.29389
OC3SNGnh.8532_x_at	MIRN187	microRNA 187			OCMX.7434.C1_x_at	TP53		1.51	NM_001126115.1	tumor protein p53	-0.298513
OC3SNGnh.15682_x_at	MIRN199B	microRNA 199b	1.96522		OC3SNGn.3292-20a_s_at	TP53		-2.29	NM_001126117.1	tumor protein p53	-0.304567
OC3SNGnh.5613_x_at	GPR162	microRNA 200c		2.05	OCEM.1388_at	TP53			NM_001126117.1	tumor protein p53	-0.3047
OC3SNGnh.14375_x_at	MIRN181B2	microRNA 181b-2		-1.58	OCEM.2100_x_at	TP53			NM_001126117.1	tumor protein p53	-0.306621
OC3SNGnh.14831_at	MIRN582	microRNA 582		2.31	OCHPRC.916_at	TP53			NM_001126117.1	tumor protein p53	-0.312262
OC3SNGnh.17053_at	GPR162	microRNA 200c		-1.55	OCMX.4067.C1_x_at	TP53			NM_001126117.1	tumor protein p53	-0.312578
OCMX.2904.C1_x_at	MIRN548C	microRNA 548c			OCEM.1388_at	TP53			NM_001126117.1	tumor protein p53	-0.313304
OC3P.11403.C1_s_at	GPR162	microRNA 200c	-1.8663	-1.63	OCEM.2100_at	TP53			NM_001126117.1	tumor protein p53	-0.314036
OCMX.6115.C1_x_at	MIRN301A	microRNA 301a		-1.6	OCADNP.12076_x_at	TP53		3.21	NM_001126117.1	tumor protein p53	-0.32411
OC3SNGnh.130_s_at	MIRN93	microRNA 93		1.64	OC3SNGnh.4528_x_at	TP53		2.04	NM_001126117.1	tumor protein p53	-0.325292
OCMX.6115.C1_x_at	MIRN301A	microRNA 301a		-1.6	OCHPRC.916_at	TP53			NM_001126117.1	tumor protein p53	-0.327225
OCMX.6115.C1_x_at	MIRN301A	microRNA 301a		-1.6	OCEM.1388_x_at	TP53			NM_001126117.1	tumor protein p53	-0.327412
OC3SNGnh.16713_at	MIRN613	microRNA 613	-2.29079		OCEM.2100_x_at	TP53			NM_001126117.1	tumor protein p53	-0.329233
OC3SNGnh.17336_x_at	MIRN559	microRNA 559			OC3SNGnh.4528_x_at	TP53		2.04	NM_001126117.1	tumor protein p53	-0.333237
OC3SNGnh.4795_x_at	MIRN573	microRNA 573			OC3SNGn.3292-20a_s_at	TP53		-2.29	NM_001126117.1	tumor protein p53	-0.333393
OC3SNGnh.13337_x_at	MIRN7-3	microRNA 7-3	2.10284		OCEM.1388_x_at	TP53			NM_001126117.1	tumor protein p53	-0.337153
OC3SNGnh.2107_x_at	MIRN552	microRNA 552	-1.61406		OCEM.2100_x_at	TP53			NM_001126117.1	tumor protein p53	-0.337819
OC3SNGnh.14375_x_at	MIRN181B2	microRNA 181b-2		-1.58	OCADNP.8578_s_at	TP53			NM_001126117.1	tumor protein p53	-0.340328
OCADNP.13786_s_at	MIRN301B	microRNA 301b	-1.50238		OCMX.7434.C1_at	TP53			NM_001126115.1	tumor protein p53	-0.340663
OCMX.3940.C1_at	MIRN625	microRNA 625		1.51	OCADNP.8578_s_at	TP53			NM_001126117.1	tumor protein p53	-0.342882
OC3SNGnh.18430_at	MIRN566	microRNA 566	-1.63878	1.54	OCEM.2100_at	TP53			NM_001126117.1	tumor protein p53	-0.346884
OC3P.12763.C1_at	MIRN151	microRNA 151			OCADNP.8578_s_at	TP53			NM_001126117.1	tumor protein p53	-0.348442
OCMX.3940.C1_at	MIRN625	microRNA 625		1.51	OC3SNGn.3292-20a_s_at	TP53		-2.29	NM_001126117.1	tumor protein p53	-0.34966
OCMXSNG.1606_at	MIRN593	microRNA 593			OCEM.1388_at	TP53			NM_001126117.1	tumor protein p53	-0.351154
OC3SNGnh.14375_x_at	MIRN181B2	microRNA 181b-2		-1.58	OCADNP.12076_x_at	TP53		3.21	NM_001126117.1	tumor protein p53	-0.360215
OC3SNGnh.16168_x_at	MIRN576	microRNA 576		-1.54	OCEM.2156_s_at	TP53			NM_001126117.1	tumor protein p53	-0.363622
OC3SNGnh.16267_at	MIRN497	microRNA 497		3.19	OCHPRC.916_at	TP53			NM_001126117.1	tumor protein p53	-0.366575
OC3P.12763.C1_at	MIRN151	microRNA 151			OCADNP.12076_x_at	TP53		3.21	NM_001126117.1	tumor protein p53	-0.368895
OCMX.3940.C1_at	MIRN625	microRNA 625		1.51	OCEM.1388_x_at	TP53			NM_001126117.1	tumor protein p53	-0.372972
OC3SNGnh.16061_x_at	MIRN604	microRNA 604			OCEM.1388_at	TP53			NM_001126117.1	tumor protein p53	-0.376036
OC3SNGnh.16168_x_at	MIRN576	microRNA 576		-1.54	OCMX.7434.C1_at	TP53			NM_001126115.1	tumor protein p53	-0.381724
OC3SNGnh.5421_at	MIRN561	microRNA 561	-2.17845		OCHPRC.916_at	TP53			NM_001126117.1	tumor protein p53	-0.383111
OC3SNGnh.17053_at	GPR162	microRNA 200c		-1.55	OCEM.1388_x_at	TP53			NM_001126117.1	tumor protein p53	-0.385777
OCADNP.13786_s_at	MIRN301B	microRNA 301b	-1.50238		OCEM.2100_x_at	TP53			NM_001126117.1	tumor protein p53	-0.386246
OCMX.12017.C1_at	MIRN146B	microRNA 146b			OC3SNGn.3292-20a_s_at	TP53		-2.29	NM_001126117.1	tumor protein p53	-0.394905
OC3SNGnh.2542_at	MIRN103-1	microRNA 103-1		1.94	OCEM.1388_at	TP53			NM_001126117.1	tumor protein p53	-0.396523
OC3SNGnh.16592_x_at	MIRN425	microRNA 425			OCEM.1388_at	TP53			NM_001126117.1	tumor protein p53	-0.40078
OC3P.11403.C1_s_at	GPR162	microRNA 200c	-1.8663	-1.63	OCADNP.12076_x_at	TP53		3.21	NM_001126117.1	tumor protein p53	-0.408656
OC3SNGnh.7186_x_at	MIRN628	microRNA 628		1.55	OCEM.1388_x_at	TP53			NM_001126117.1	tumor protein p53	-0.416809
OC3SNGnh.2107_x_at	MIRN552	microRNA 552	-1.61406		OCADNP.8578_s_at	TP53			NM_001126117.1	tumor protein p53	-0.41713
OC3P.2409.C1_s_at	MIRN21	microRNA 21		1.86	OCEM.1388_x_at	TP53			NM_001126117.1	tumor protein p53	-0.421555
OC3SNGnh.8532_x_at	MIRN187	microRNA 187			OC3SNGnh.4528_x_at	TP53		2.04	NM_001126117.1	tumor protein p53	-0.424391
OC3P.2409.C1_s_at	MIRN21	microRNA 21		1.86	OCEM.1388_at	TP53			NM_001126117.1	tumor protein p53	-0.429886
OC3SNGnh.8532_x_at	MIRN187	microRNA 187			OCADNP.12076_x_at	TP53		3.21	NM_001126117.1	tumor protein p53	-0.430847
OC3SNGnh.13689_x_at	MIRN642	microRNA 642	-1.55694		OCEM.1388_at	TP53			NM_001126117.1	tumor protein p53	-0.432864
OC3SNGnh.2220_at	MIRN149	microRNA 149		1.75	OCEM.1388_at	TP53			NM_001126117.1	tumor protein p53	-0.433536
OC3SNGnh.12857_x_at	MIRN600	microRNA 600			OCEM.1388_x_at	TP53			NM_001126117.1	tumor protein p53	-0.435758
OC3SNGnh.8532_x_at	MIRN187	microRNA 187			OCADNP.8578_s_at	TP53			NM_001126117.1	tumor protein p53	-0.44093
OC3SNGnh.2107_x_at	MIRN552	microRNA 552	-1.61406		OCEM.2100_at	TP53			NM_001126117.1	tumor protein p53	-0.441517
OC3SNGnh.14831_at	MIRN582	microRNA 582		2.31	OCEM.1388_at	TP53			NM_001126117.1	tumor protein p53	-0.442601
OC3SNGnh.331_at	MIRN597	microRNA 597			OCEM.1388_at	TP53			NM_001126117.1	tumor protein p53	-0.457482
OC3SNGnh.5421_at	MIRN561	microRNA 561	-2.17845		OCMX.7434.C1_x_at	TP53		1.51	NM_001126115.1	tumor protein p53	-0.457779
OC3SNGnh.16267_at	MIRN497	microRNA 497		3.19	OCEM.1388_x_at	TP53			NM_001126117.1	tumor protein p53	-0.462513
OC3SNGnh.16168_x_at	MIRN576	microRNA 576		-1.54	OCEM.2100_at	TP53			NM_001126117.1	tumor protein p53	-0.464791
OCMX.3940.C1_at	MIRN625	microRNA 625		1.51	OCEM.1388_at	TP53			NM_001126117.1	tumor protein p53	-0.468706
OC3P.11403.C1_s_at	GPR162	microRNA 200c	-1.8663	-1.63	OCEM.2100_x_at	TP53			NM_001126117.1	tumor protein p53	-0.474514
OC3SNGnh.14831_at	MIRN582	microRNA 582		2.31	OC3SNGnh.6834_at	TP53			NM_001126117.1	tumor protein p53	-0.47739
OCMX.6115.C1_x_at	MIRN301A	microRNA 301a		-1.6	OCMX.7434.C1_x_at	TP53		1.51	NM_001126115.1	tumor protein p53	-0.493265
OC3P.11403.C1_s_at	GPR162	microRNA 200c	-1.8663	-1.63	OCMX.4067.C1_x_at	TP53			NM_001126117.1	tumor protein p53	-0.494076
OC3SNGnh.14375_x_at	MIRN181B2	microRNA 181b-2		-1.58	OCMX.7434.C1_x_at	TP53		1.51	NM_001126115.1	tumor protein p53	-0.496339
OCRS2.2867_s_at	MIRN198	microRNA 198		1.6	OCEM.1388_at	TP53			NM_001126117.1	tumor protein p53	-0.498109
OC3SNGnh.2107_x_at	MIRN552	microRNA 552	-1.61406		OCHPRC.916_at	TP53			NM_001126117.1	tumor protein p53	-0.498293
OC3SNGnh.5421_at	MIRN561	microRNA 561	-2.17845		OCADNP.12076_x_at	TP53		3.21	NM_001126117.1	tumor protein p53	-0.503675
OC3SNGnh.8532_x_at	MIRN187	microRNA 187			OC3SNGn.3292-20a_s_at	TP53		-2.29	NM_001126117.1	tumor protein p53	-0.507482
OC3SNGnh.5421_at	MIRN561	microRNA 561	-2.17845		OCEM.2100_at	TP53			NM_001126117.1	tumor protein p53	-0.511265
OC3SNGnh.2107_x_at	MIRN552	microRNA 552	-1.61406		OCMX.4067.C1_x_at	TP53			NM_001126117.1	tumor protein p53	-0.52131
OC3SNGnh.16168_x_at	MIRN576	microRNA 576		-1.54	OCADNP.12076_x_at	TP53		3.21	NM_001126117.1	tumor protein p53	-0.526431
OC3SNGnh.5421_at	MIRN561	microRNA 561	-2.17845		OCMX.7434.C1_at	TP53			NM_001126115.1	tumor protein p53	-0.530327
OC3SNGnh.14375_x_at	MIRN181B2	microRNA 181b-2		-1.58	OC3SNGn.3292-20a_s_at	TP53		-2.29	NM_001126117.1	tumor protein p53	-0.530584
OC3SNGnh.5421_at	MIRN561	microRNA 561	-2.17845		OCEM.2156_s_at	TP53			NM_001126117.1	tumor protein p53	-0.538299
OC3SNGnh.2107_x_at	MIRN552	microRNA 552	-1.61406		OCADNP.12076_x_at	TP53		3.21	NM_001126117.1	tumor protein p53	-0.552392
OCMX.12017.C1_at	MIRN146B	microRNA 146b			OCEM.1388_x_at	TP53			NM_001126117.1	tumor protein p53	-0.553093
OC3SNGnh.2107_x_at	MIRN552	microRNA 552	-1.61406		OCEM.1388_at	TP53			NM_001126117.1	tumor protein p53	-0.556149
OC3SNGnh.14117_at	MIRN557	microRNA 557			OC3SNGn.3292-20a_s_at	TP53		-2.29	NM_001126117.1	tumor protein p53	-0.561457
OC3SNGnh.5421_at	MIRN561	microRNA 561	-2.17845		OCMX.4067.C1_x_at	TP53			NM_001126117.1	tumor protein p53	-0.569069
OCMX.6115.C1_x_at	MIRN301A	microRNA 301a		-1.6	OCEM.2100_x_at	TP53			NM_001126117.1	tumor protein p53	-0.570492
OCMX.6115.C1_x_at	MIRN301A	microRNA 301a		-1.6	OC3SNGnh.4528_x_at	TP53		2.04	NM_001126117.1	tumor protein p53	-0.575993
OC3SNGnh.11550_at	MIRN29C	microRNA 29c		1.55	OCEM.1388_at	TP53			NM_001126117.1	tumor protein p53	-0.589851
OC3SNGnh.16168_x_at	MIRN576	microRNA 576		-1.54	OCMX.4067.C1_x_at	TP53			NM_001126117.1	tumor protein p53	-0.591835
OC3SNGnh.14831_at	MIRN582	microRNA 582		2.31	OC3SNGn.3292-20a_s_at	TP53		-2.29	NM_001126117.1	tumor protein p53	-0.595189
OC3SNGnh.8532_x_at	MIRN187	microRNA 187			OCHPRC.916_at	TP53			NM_001126117.1	tumor protein p53	-0.600137
OC3SNGnh.14375_x_at	MIRN181B2	microRNA 181b-2		-1.58	OCHPRC.916_at	TP53			NM_001126117.1	tumor protein p53	-0.60483
OC3SNGnh.4795_x_at	MIRN573	microRNA 573			OCEM.1388_x_at	TP53			NM_001126117.1	tumor protein p53	-0.605241
OC3SNGnh.14831_at	MIRN582	microRNA 582		2.31	OCADNP.8578_s_at	TP53			NM_001126117.1	tumor protein p53	-0.610531
OC3SNGnh.2107_x_at	MIRN552	microRNA 552	-1.61406		OCEM.2156_s_at	TP53			NM_001126117.1	tumor protein p53	-0.612936
OC3SNGnh.130_s_at	MIRN93	microRNA 93		1.64	OC3SNGn.3292-20a_s_at	TP53		-2.29	NM_001126117.1	tumor protein p53	-0.62054
OCMX.6115.C1_x_at	MIRN301A	microRNA 301a		-1.6	OCEM.2156_s_at	TP53			NM_001126117.1	tumor protein p53	-0.625041
OC3SNGnh.16267_at	MIRN497	microRNA 497		3.19	OCADNP.8578_s_at	TP53			NM_001126117.1	tumor protein p53	-0.629283
OC3P.12763.C1_x_at	MIRN151	microRNA 151		1.74	OCEM.1388_at	TP53			NM_001126117.1	tumor protein p53	-0.639675
OC3SNGnh.16168_x_at	MIRN576	microRNA 576		-1.54	OCEM.2100_x_at	TP53			NM_001126117.1	tumor protein p53	-0.668968
OC3SNGnh.14375_x_at	MIRN181B2	microRNA 181b-2		-1.58	OC3SNGnh.4528_x_at	TP53		2.04	NM_001126117.1	tumor protein p53	-0.671183
OC3SNGnh.15682_x_at	MIRN199B	microRNA 199b	1.96522		OCEM.1388_x_at	TP53			NM_001126117.1	tumor protein p53	-0.682957
OC3SNGnh.14117_at	MIRN557	microRNA 557			OCEM.1388_x_at	TP53			NM_001126117.1	tumor protein p53	-0.708418
OC3SNGnh.17336_x_at	MIRN559	microRNA 559			OCEM.1388_x_at	TP53			NM_001126117.1	tumor protein p53	-0.711548
OC3SNGnh.5421_at	MIRN561	microRNA 561	-2.17845		OCEM.2100_x_at	TP53			NM_001126117.1	tumor protein p53	-0.731216
OC3SNGnh.130_s_at	MIRN93	microRNA 93		1.64	OCEM.1388_x_at	TP53			NM_001126117.1	tumor protein p53	-0.73501
OC3SNGnh.18430_at	MIRN566	microRNA 566	-1.63878	1.54	OCEM.1388_at	TP53			NM_001126117.1	tumor protein p53	-0.73579
OC3SNGnh.14375_x_at	MIRN181B2	microRNA 181b-2		-1.58	OCMX.4067.C1_x_at	TP53			NM_001126117.1	tumor protein p53	-0.760738
OC3SNGnh.8532_x_at	MIRN187	microRNA 187			OCMX.4067.C1_x_at	TP53			NM_001126117.1	tumor protein p53	-0.765373
OC3P.12763.C1_at	MIRN151	microRNA 151			OCEM.1388_at	TP53			NM_001126117.1	tumor protein p53	-0.769586
OC3SNGnh.14375_x_at	MIRN181B2	microRNA 181b-2		-1.58	OCEM.1388_x_at	TP53			NM_001126117.1	tumor protein p53	-0.780421
OC3SNGnh.8532_x_at	MIRN187	microRNA 187			OCEM.2156_s_at	TP53			NM_001126117.1	tumor protein p53	-0.791532
OC3SNGnh.14375_x_at	MIRN181B2	microRNA 181b-2		-1.58	OCEM.2156_s_at	TP53			NM_001126117.1	tumor protein p53	-0.791535
OCMX.6115.C1_x_at	MIRN301A	microRNA 301a		-1.6	OCMX.4067.C1_x_at	TP53			NM_001126117.1	tumor protein p53	-0.829488
OC3SNGnh.16267_at	MIRN497	microRNA 497		3.19	OC3SNGn.3292-20a_s_at	TP53		-2.29	NM_001126117.1	tumor protein p53	-0.845486
OC3SNGnh.8532_x_at	MIRN187	microRNA 187			OCEM.1388_x_at	TP53			NM_001126117.1	tumor protein p53	-0.858805
OC3SNGnh.10536_at	MIRN101-1	microRNA 101-1		1.63	OCADNP.16957_s_at	SUFU			NM_016169.2	suppressor of fused homolog (Drosophila)	0.877286
OC3SNGnh.10536_at	MIRN101-1	microRNA 101-1		1.63	OCMX.6657.C1_at	SUFU			NM_016169.2	suppressor of fused homolog (Drosophila)	0.744167
OC3SNGnh.10536_at	MIRN101-1	microRNA 101-1		1.63	OCMX.6657.C1_x_at	SUFU		1.57	NM_016169.2	suppressor of fused homolog (Drosophila)	0.439243
OC3SNGnh.6176_x_at	MIRN101-1	microRNA 101-1	1.60869		OC3P.13338.C1_s_at	SUFU			NM_016169.2	suppressor of fused homolog (Drosophila)	0.0539842
OC3SNGnh.10536_at	MIRN101-1	microRNA 101-1		1.63	OC3P.13338.C1_s_at	SUFU			NM_016169.2	suppressor of fused homolog (Drosophila)	0.0358224
OC3SNGnh.6176_x_at	MIRN101-1	microRNA 101-1	1.60869		OCMX.6657.C1_at	SUFU			NM_016169.2	suppressor of fused homolog (Drosophila)	-0.0364317
OC3SNGnh.6176_x_at	MIRN101-1	microRNA 101-1	1.60869		OCMX.6657.C1_x_at	SUFU		1.57	NM_016169.2	suppressor of fused homolog (Drosophila)	-0.0549105
OC3SNGnh.6176_x_at	MIRN101-1	microRNA 101-1	1.60869		OCADNP.16957_s_at	SUFU			NM_016169.2	suppressor of fused homolog (Drosophila)	-0.123026
OC3SNGnh.13214_at	MIRN101-2	microRNA 101-2	1.95404	-1.79	OCADNP.16957_s_at	SUFU			NM_016169.2	suppressor of fused homolog (Drosophila)	0.152478
OC3SNGnh.13214_at	MIRN101-2	microRNA 101-2	1.95404	-1.79	OCMX.6657.C1_at	SUFU			NM_016169.2	suppressor of fused homolog (Drosophila)	0.0947523
OC3SNGnh.13214_at	MIRN101-2	microRNA 101-2	1.95404	-1.79	OC3P.13338.C1_s_at	SUFU			NM_016169.2	suppressor of fused homolog (Drosophila)	0.0794283
OC3SNGnh.13214_at	MIRN101-2	microRNA 101-2	1.95404	-1.79	OCMX.6657.C1_x_at	SUFU		1.57	NM_016169.2	suppressor of fused homolog (Drosophila)	0.0603601
OC3SNGnh.2542_at	MIRN103-1	microRNA 103-1		1.94	OCMX.6657.C1_at	SUFU			NM_016169.2	suppressor of fused homolog (Drosophila)	0.963569
OC3SNGnh.2542_at	MIRN103-1	microRNA 103-1		1.94	OCMX.6657.C1_x_at	SUFU		1.57	NM_016169.2	suppressor of fused homolog (Drosophila)	0.88974
OC3SNGnh.2542_at	MIRN103-1	microRNA 103-1		1.94	OCADNP.16957_s_at	SUFU			NM_016169.2	suppressor of fused homolog (Drosophila)	0.781002
OC3SNGnh.2542_at	MIRN103-1	microRNA 103-1		1.94	OC3P.13338.C1_s_at	SUFU			NM_016169.2	suppressor of fused homolog (Drosophila)	0.68454
OC3SNGnh.4055_at	MIRN103-2	microRNA 103-2		2.04	OCADNP.16957_s_at	SUFU			NM_016169.2	suppressor of fused homolog (Drosophila)	0.938655
OC3SNGnh.4055_at	MIRN103-2	microRNA 103-2		2.04	OCMX.6657.C1_x_at	SUFU		1.57	NM_016169.2	suppressor of fused homolog (Drosophila)	0.741261
OC3SNGnh.4055_at	MIRN103-2	microRNA 103-2		2.04	OCMX.6657.C1_at	SUFU			NM_016169.2	suppressor of fused homolog (Drosophila)	0.694608
OC3SNGnh.4055_at	MIRN103-2	microRNA 103-2		2.04	OC3P.13338.C1_s_at	SUFU			NM_016169.2	suppressor of fused homolog (Drosophila)	0.432897
OCRS2.13103_s_at	MIRN124-3	microRNA 124-3			OCADNP.16957_s_at	SUFU			NM_016169.2	suppressor of fused homolog (Drosophila)	0.901034
OCRS2.13103_s_at	MIRN124-3	microRNA 124-3			OCMX.6657.C1_at	SUFU			NM_016169.2	suppressor of fused homolog (Drosophila)	0.854117
OCRS2.13103_s_at	MIRN124-3	microRNA 124-3			OCMX.6657.C1_x_at	SUFU		1.57	NM_016169.2	suppressor of fused homolog (Drosophila)	0.512656
OCRS2.13103_s_at	MIRN124-3	microRNA 124-3			OC3P.13338.C1_s_at	SUFU			NM_016169.2	suppressor of fused homolog (Drosophila)	0.111031
OCRS2.551_x_at	MIRN129-1	microRNA 129-1			OCADNP.16957_s_at	SUFU			NM_016169.2	suppressor of fused homolog (Drosophila)	0.970977
OCRS2.551_x_at	MIRN129-1	microRNA 129-1			OCMX.6657.C1_at	SUFU			NM_016169.2	suppressor of fused homolog (Drosophila)	0.843739
OCRS2.551_x_at	MIRN129-1	microRNA 129-1			OCMX.6657.C1_x_at	SUFU		1.57	NM_016169.2	suppressor of fused homolog (Drosophila)	0.762835
OCRS2.551_x_at	MIRN129-1	microRNA 129-1			OC3P.13338.C1_s_at	SUFU			NM_016169.2	suppressor of fused homolog (Drosophila)	0.455155
OC3SNGnh.8370_at	MIRN138-2	microRNA 138-2			OCMX.6657.C1_at	SUFU			NM_016169.2	suppressor of fused homolog (Drosophila)	0.758317
OC3SNGnh.8370_at	MIRN138-2	microRNA 138-2			OCMX.6657.C1_x_at	SUFU		1.57	NM_016169.2	suppressor of fused homolog (Drosophila)	0.714529
OC3SNGnh.8370_at	MIRN138-2	microRNA 138-2			OC3P.13338.C1_s_at	SUFU			NM_016169.2	suppressor of fused homolog (Drosophila)	0.652978
OC3SNGnh.8370_at	MIRN138-2	microRNA 138-2			OCADNP.16957_s_at	SUFU			NM_016169.2	suppressor of fused homolog (Drosophila)	0.56451
OCMX.8490.C1_at	MIRN139	microRNA 139		1.55	OCADNP.16957_s_at	SUFU			NM_016169.2	suppressor of fused homolog (Drosophila)	0.988103
OCMX.8490.C1_at	MIRN139	microRNA 139		1.55	OCMX.6657.C1_at	SUFU			NM_016169.2	suppressor of fused homolog (Drosophila)	0.849336
OCMX.8490.C1_at	MIRN139	microRNA 139		1.55	OCMX.6657.C1_x_at	SUFU		1.57	NM_016169.2	suppressor of fused homolog (Drosophila)	0.800314
OCMX.8490.C1_at	MIRN139	microRNA 139		1.55	OC3P.13338.C1_s_at	SUFU			NM_016169.2	suppressor of fused homolog (Drosophila)	0.481128
OCMX.12017.C1_at	MIRN146B	microRNA 146b			OCADNP.16957_s_at	SUFU			NM_016169.2	suppressor of fused homolog (Drosophila)	0.532247
OCMX.12017.C1_at	MIRN146B	microRNA 146b			OCMX.6657.C1_x_at	SUFU		1.57	NM_016169.2	suppressor of fused homolog (Drosophila)	0.466102
OCMX.12017.C1_at	MIRN146B	microRNA 146b			OC3P.13338.C1_s_at	SUFU			NM_016169.2	suppressor of fused homolog (Drosophila)	0.405644
OCMX.12017.C1_at	MIRN146B	microRNA 146b			OCMX.6657.C1_at	SUFU			NM_016169.2	suppressor of fused homolog (Drosophila)	0.139686
OC3SNGnh.2220_at	MIRN149	microRNA 149		1.75	OCMX.6657.C1_x_at	SUFU		1.57	NM_016169.2	suppressor of fused homolog (Drosophila)	0.908145
OC3SNGnh.2220_at	MIRN149	microRNA 149		1.75	OCADNP.16957_s_at	SUFU			NM_016169.2	suppressor of fused homolog (Drosophila)	0.832732
OC3SNGnh.2220_at	MIRN149	microRNA 149		1.75	OCMX.6657.C1_at	SUFU			NM_016169.2	suppressor of fused homolog (Drosophila)	0.753084
OC3SNGnh.2220_at	MIRN149	microRNA 149		1.75	OC3P.13338.C1_s_at	SUFU			NM_016169.2	suppressor of fused homolog (Drosophila)	0.695002
OC3P.12763.C1_x_at	MIRN151	microRNA 151		1.74	OCMX.6657.C1_x_at	SUFU		1.57	NM_016169.2	suppressor of fused homolog (Drosophila)	0.872363
OC3P.12763.C1_x_at	MIRN151	microRNA 151		1.74	OC3P.13338.C1_s_at	SUFU			NM_016169.2	suppressor of fused homolog (Drosophila)	0.811818
OC3P.12763.C1_at	MIRN151	microRNA 151			OCMX.6657.C1_x_at	SUFU		1.57	NM_016169.2	suppressor of fused homolog (Drosophila)	0.797817
OC3P.12763.C1_at	MIRN151	microRNA 151			OC3P.13338.C1_s_at	SUFU			NM_016169.2	suppressor of fused homolog (Drosophila)	0.75003
OC3P.12763.C1_x_at	MIRN151	microRNA 151		1.74	OCMX.6657.C1_at	SUFU			NM_016169.2	suppressor of fused homolog (Drosophila)	0.656726
OC3P.12763.C1_at	MIRN151	microRNA 151			OCMX.6657.C1_at	SUFU			NM_016169.2	suppressor of fused homolog (Drosophila)	0.647245
OC3P.12763.C1_x_at	MIRN151	microRNA 151		1.74	OCADNP.16957_s_at	SUFU			NM_016169.2	suppressor of fused homolog (Drosophila)	0.525925
OC3P.12763.C1_at	MIRN151	microRNA 151			OCADNP.16957_s_at	SUFU			NM_016169.2	suppressor of fused homolog (Drosophila)	0.426036
OC3SNGnh.14375_x_at	MIRN181B2	microRNA 181b-2		-1.58	OC3P.13338.C1_s_at	SUFU			NM_016169.2	suppressor of fused homolog (Drosophila)	0.231484
OC3SNGnh.14375_x_at	MIRN181B2	microRNA 181b-2		-1.58	OCMX.6657.C1_x_at	SUFU		1.57	NM_016169.2	suppressor of fused homolog (Drosophila)	-0.199003
OC3SNGnh.14375_x_at	MIRN181B2	microRNA 181b-2		-1.58	OCMX.6657.C1_at	SUFU			NM_016169.2	suppressor of fused homolog (Drosophila)	-0.646331
OC3SNGnh.14375_x_at	MIRN181B2	microRNA 181b-2		-1.58	OCADNP.16957_s_at	SUFU			NM_016169.2	suppressor of fused homolog (Drosophila)	-0.685343
OC3P.13017.C1_x_at	MIRN181D	microRNA 181d		1.51	OCMX.6657.C1_x_at	SUFU		1.57	NM_016169.2	suppressor of fused homolog (Drosophila)	0.919879
OC3P.13017.C1_x_at	MIRN181D	microRNA 181d		1.51	OCADNP.16957_s_at	SUFU			NM_016169.2	suppressor of fused homolog (Drosophila)	0.899305
OC3P.13017.C1_x_at	MIRN181D	microRNA 181d		1.51	OCMX.6657.C1_at	SUFU			NM_016169.2	suppressor of fused homolog (Drosophila)	0.823682
OC3P.13017.C1_x_at	MIRN181D	microRNA 181d		1.51	OC3P.13338.C1_s_at	SUFU			NM_016169.2	suppressor of fused homolog (Drosophila)	0.719153
OC3SNGnh.8532_x_at	MIRN187	microRNA 187			OC3P.13338.C1_s_at	SUFU			NM_016169.2	suppressor of fused homolog (Drosophila)	0.519134
OC3SNGnh.8532_x_at	MIRN187	microRNA 187			OCMX.6657.C1_x_at	SUFU		1.57	NM_016169.2	suppressor of fused homolog (Drosophila)	0.103832
OC3SNGnh.8532_x_at	MIRN187	microRNA 187			OCMX.6657.C1_at	SUFU			NM_016169.2	suppressor of fused homolog (Drosophila)	-0.435858
OC3SNGnh.8532_x_at	MIRN187	microRNA 187			OCADNP.16957_s_at	SUFU			NM_016169.2	suppressor of fused homolog (Drosophila)	-0.498424
OCRS2.2867_s_at	MIRN198	microRNA 198		1.6	OCMX.6657.C1_x_at	SUFU		1.57	NM_016169.2	suppressor of fused homolog (Drosophila)	0.932522
OCRS2.2867_s_at	MIRN198	microRNA 198		1.6	OCMX.6657.C1_at	SUFU			NM_016169.2	suppressor of fused homolog (Drosophila)	0.88692
OCRS2.2867_s_at	MIRN198	microRNA 198		1.6	OCADNP.16957_s_at	SUFU			NM_016169.2	suppressor of fused homolog (Drosophila)	0.806281
OCRS2.2867_s_at	MIRN198	microRNA 198		1.6	OC3P.13338.C1_s_at	SUFU			NM_016169.2	suppressor of fused homolog (Drosophila)	0.727034
OC3SNGnh.15682_x_at	MIRN199B	microRNA 199b	1.96522		OC3P.13338.C1_s_at	SUFU			NM_016169.2	suppressor of fused homolog (Drosophila)	0.671651
OC3SNGnh.15682_x_at	MIRN199B	microRNA 199b	1.96522		OCMX.6657.C1_x_at	SUFU		1.57	NM_016169.2	suppressor of fused homolog (Drosophila)	0.591186
OC3SNGnh.15682_x_at	MIRN199B	microRNA 199b	1.96522		OCADNP.16957_s_at	SUFU			NM_016169.2	suppressor of fused homolog (Drosophila)	0.370335
OC3SNGnh.15682_x_at	MIRN199B	microRNA 199b	1.96522		OCMX.6657.C1_at	SUFU			NM_016169.2	suppressor of fused homolog (Drosophila)	0.0697373
OC3SNGnh.5613_x_at	GPR162	microRNA 200c		2.05	OCMX.6657.C1_at	SUFU			NM_016169.2	suppressor of fused homolog (Drosophila)	0.933942
OC3SNGnh.5613_x_at	GPR162	microRNA 200c		2.05	OCADNP.16957_s_at	SUFU			NM_016169.2	suppressor of fused homolog (Drosophila)	0.895706
OC3SNGnh.17053_at	GPR162	microRNA 200c		-1.55	OC3P.13338.C1_s_at	SUFU			NM_016169.2	suppressor of fused homolog (Drosophila)	0.868553
OC3SNGnh.5613_x_at	GPR162	microRNA 200c		2.05	OCMX.6657.C1_x_at	SUFU		1.57	NM_016169.2	suppressor of fused homolog (Drosophila)	0.858081
OC3SNGnh.17053_at	GPR162	microRNA 200c		-1.55	OCMX.6657.C1_x_at	SUFU		1.57	NM_016169.2	suppressor of fused homolog (Drosophila)	0.794852
OC3SNGnh.5613_x_at	GPR162	microRNA 200c		2.05	OC3P.13338.C1_s_at	SUFU			NM_016169.2	suppressor of fused homolog (Drosophila)	0.594133
OC3SNGnh.17053_at	GPR162	microRNA 200c		-1.55	OCMX.6657.C1_at	SUFU			NM_016169.2	suppressor of fused homolog (Drosophila)	0.568911
OC3P.11403.C1_s_at	GPR162	microRNA 200c	-1.8663	-1.63	OCMX.6657.C1_at	SUFU			NM_016169.2	suppressor of fused homolog (Drosophila)	0.50832
OC3SNGnh.17053_at	GPR162	microRNA 200c		-1.55	OCADNP.16957_s_at	SUFU			NM_016169.2	suppressor of fused homolog (Drosophila)	0.418504
OC3P.11403.C1_s_at	GPR162	microRNA 200c	-1.8663	-1.63	OCMX.6657.C1_x_at	SUFU		1.57	NM_016169.2	suppressor of fused homolog (Drosophila)	0.136453
OC3P.11403.C1_s_at	GPR162	microRNA 200c	-1.8663	-1.63	OC3P.13338.C1_s_at	SUFU			NM_016169.2	suppressor of fused homolog (Drosophila)	0.103163
OC3P.11403.C1_s_at	GPR162	microRNA 200c	-1.8663	-1.63	OCADNP.16957_s_at	SUFU			NM_016169.2	suppressor of fused homolog (Drosophila)	-0.0343641
OC3P.2409.C1_s_at	MIRN21	microRNA 21		1.86	OCMX.6657.C1_x_at	SUFU		1.57	NM_016169.2	suppressor of fused homolog (Drosophila)	0.932678
OC3P.2409.C1_s_at	MIRN21	microRNA 21		1.86	OC3P.13338.C1_s_at	SUFU			NM_016169.2	suppressor of fused homolog (Drosophila)	0.869651
OC3P.2409.C1_s_at	MIRN21	microRNA 21		1.86	OCADNP.16957_s_at	SUFU			NM_016169.2	suppressor of fused homolog (Drosophila)	0.674212
OC3P.2409.C1_s_at	MIRN21	microRNA 21		1.86	OCMX.6657.C1_at	SUFU			NM_016169.2	suppressor of fused homolog (Drosophila)	0.548567
OCMX.2899.C1_at	MIRN210	microRNA 210		1.76	OCADNP.16957_s_at	SUFU			NM_016169.2	suppressor of fused homolog (Drosophila)	0.978634
OCMX.2899.C1_at	MIRN210	microRNA 210		1.76	OCMX.6657.C1_at	SUFU			NM_016169.2	suppressor of fused homolog (Drosophila)	0.774405
OCMX.2899.C1_at	MIRN210	microRNA 210		1.76	OCMX.6657.C1_x_at	SUFU		1.57	NM_016169.2	suppressor of fused homolog (Drosophila)	0.76229
OCMX.2899.C1_at	MIRN210	microRNA 210		1.76	OC3P.13338.C1_s_at	SUFU			NM_016169.2	suppressor of fused homolog (Drosophila)	0.426032
OCMX.12930.C1_at	MIRN22	microRNA 22		1.66	OCADNP.16957_s_at	SUFU			NM_016169.2	suppressor of fused homolog (Drosophila)	0.902949
OCMX.12930.C1_at	MIRN22	microRNA 22		1.66	OCMX.6657.C1_at	SUFU			NM_016169.2	suppressor of fused homolog (Drosophila)	0.550611
OCMX.12930.C1_at	MIRN22	microRNA 22		1.66	OCMX.6657.C1_x_at	SUFU		1.57	NM_016169.2	suppressor of fused homolog (Drosophila)	0.47593
OCMX.12930.C1_at	MIRN22	microRNA 22		1.66	OC3P.13338.C1_s_at	SUFU			NM_016169.2	suppressor of fused homolog (Drosophila)	0.0984136
OC3SNGnh.11550_at	MIRN29C	microRNA 29c		1.55	OCMX.6657.C1_at	SUFU			NM_016169.2	suppressor of fused homolog (Drosophila)	0.838432
OC3SNGnh.11550_at	MIRN29C	microRNA 29c		1.55	OCMX.6657.C1_x_at	SUFU		1.57	NM_016169.2	suppressor of fused homolog (Drosophila)	0.762121
OC3SNGnh.11550_at	MIRN29C	microRNA 29c		1.55	OCADNP.16957_s_at	SUFU			NM_016169.2	suppressor of fused homolog (Drosophila)	0.585485
OC3SNGnh.11550_at	MIRN29C	microRNA 29c		1.55	OC3P.13338.C1_s_at	SUFU			NM_016169.2	suppressor of fused homolog (Drosophila)	0.583673
OCMX.6115.C1_x_at	MIRN301A	microRNA 301a		-1.6	OC3P.13338.C1_s_at	SUFU			NM_016169.2	suppressor of fused homolog (Drosophila)	-0.0529177
OCMX.6115.C1_x_at	MIRN301A	microRNA 301a		-1.6	OCMX.6657.C1_x_at	SUFU		1.57	NM_016169.2	suppressor of fused homolog (Drosophila)	-0.394444
OCMX.6115.C1_x_at	MIRN301A	microRNA 301a		-1.6	OCMX.6657.C1_at	SUFU			NM_016169.2	suppressor of fused homolog (Drosophila)	-0.450622
OCMX.6115.C1_x_at	MIRN301A	microRNA 301a		-1.6	OCADNP.16957_s_at	SUFU			NM_016169.2	suppressor of fused homolog (Drosophila)	-0.708017
OCUTR.226_x_at	MIRN301B	microRNA 301b		1.55	OCMX.6657.C1_at	SUFU			NM_016169.2	suppressor of fused homolog (Drosophila)	0.942676
OCUTR.226_x_at	MIRN301B	microRNA 301b		1.55	OCADNP.16957_s_at	SUFU			NM_016169.2	suppressor of fused homolog (Drosophila)	0.940368
OCUTR.226_x_at	MIRN301B	microRNA 301b		1.55	OCMX.6657.C1_x_at	SUFU		1.57	NM_016169.2	suppressor of fused homolog (Drosophila)	0.842869
OCADNP.13786_s_at	MIRN301B	microRNA 301b	-1.50238		OCMX.6657.C1_at	SUFU			NM_016169.2	suppressor of fused homolog (Drosophila)	0.564712
OCUTR.226_x_at	MIRN301B	microRNA 301b		1.55	OC3P.13338.C1_s_at	SUFU			NM_016169.2	suppressor of fused homolog (Drosophila)	0.541774
OCADNP.13786_s_at	MIRN301B	microRNA 301b	-1.50238		OCADNP.16957_s_at	SUFU			NM_016169.2	suppressor of fused homolog (Drosophila)	0.132401
OCADNP.13786_s_at	MIRN301B	microRNA 301b	-1.50238		OCMX.6657.C1_x_at	SUFU		1.57	NM_016169.2	suppressor of fused homolog (Drosophila)	0.10436
OCADNP.13786_s_at	MIRN301B	microRNA 301b	-1.50238		OC3P.13338.C1_s_at	SUFU			NM_016169.2	suppressor of fused homolog (Drosophila)	-0.0694014
OCMX.6961.C1_at	MIRN30E	microRNA 30e			OCADNP.16957_s_at	SUFU			NM_016169.2	suppressor of fused homolog (Drosophila)	0.826493
OCMX.6961.C1_at	MIRN30E	microRNA 30e			OCMX.6657.C1_x_at	SUFU		1.57	NM_016169.2	suppressor of fused homolog (Drosophila)	0.608893
OCMX.6961.C1_at	MIRN30E	microRNA 30e			OCMX.6657.C1_at	SUFU			NM_016169.2	suppressor of fused homolog (Drosophila)	0.407648
OCMX.6961.C1_at	MIRN30E	microRNA 30e			OC3P.13338.C1_s_at	SUFU			NM_016169.2	suppressor of fused homolog (Drosophila)	0.402669
OCRS2.5576_x_at	MIRN324	microRNA 324			OCMX.6657.C1_x_at	SUFU		1.57	NM_016169.2	suppressor of fused homolog (Drosophila)	0.881693
OCRS2.5576_x_at	MIRN324	microRNA 324			OCADNP.16957_s_at	SUFU			NM_016169.2	suppressor of fused homolog (Drosophila)	0.870593
OCRS2.5576_x_at	MIRN324	microRNA 324			OCMX.6657.C1_at	SUFU			NM_016169.2	suppressor of fused homolog (Drosophila)	0.691711
OCRS2.5576_x_at	MIRN324	microRNA 324			OC3P.13338.C1_s_at	SUFU			NM_016169.2	suppressor of fused homolog (Drosophila)	0.669769
OC3SNGnh.14278_at	MIRN339	microRNA 339		1.64	OCADNP.16957_s_at	SUFU			NM_016169.2	suppressor of fused homolog (Drosophila)	0.962502
OC3SNGnh.14278_at	MIRN339	microRNA 339		1.64	OCMX.6657.C1_x_at	SUFU		1.57	NM_016169.2	suppressor of fused homolog (Drosophila)	0.804498
OC3SNGnh.14278_at	MIRN339	microRNA 339		1.64	OCMX.6657.C1_at	SUFU			NM_016169.2	suppressor of fused homolog (Drosophila)	0.80125
OC3SNGnh.14278_at	MIRN339	microRNA 339		1.64	OC3P.13338.C1_s_at	SUFU			NM_016169.2	suppressor of fused homolog (Drosophila)	0.509966
OC3SNGnh.6784_at	MIRN33A	microRNA 33a		1.52	OCADNP.16957_s_at	SUFU			NM_016169.2	suppressor of fused homolog (Drosophila)	0.856227
OC3SNGnh.6784_at	MIRN33A	microRNA 33a		1.52	OCMX.6657.C1_at	SUFU			NM_016169.2	suppressor of fused homolog (Drosophila)	0.700364
OC3SNGnh.6784_at	MIRN33A	microRNA 33a		1.52	OCMX.6657.C1_x_at	SUFU		1.57	NM_016169.2	suppressor of fused homolog (Drosophila)	0.568431
OC3SNGnh.6784_at	MIRN33A	microRNA 33a		1.52	OC3P.13338.C1_s_at	SUFU			NM_016169.2	suppressor of fused homolog (Drosophila)	0.29065
OC3SNGnh.14547_x_at	MIRN345	microRNA 345			OCADNP.16957_s_at	SUFU			NM_016169.2	suppressor of fused homolog (Drosophila)	0.906975
OC3SNGnh.14547_x_at	MIRN345	microRNA 345			OCMX.6657.C1_x_at	SUFU		1.57	NM_016169.2	suppressor of fused homolog (Drosophila)	0.849007
OC3SNGnh.14547_x_at	MIRN345	microRNA 345			OCMX.6657.C1_at	SUFU			NM_016169.2	suppressor of fused homolog (Drosophila)	0.660054
OC3SNGnh.14547_x_at	MIRN345	microRNA 345			OC3P.13338.C1_s_at	SUFU			NM_016169.2	suppressor of fused homolog (Drosophila)	0.642839
OC3SNGnh.16592_x_at	MIRN425	microRNA 425			OCMX.6657.C1_x_at	SUFU		1.57	NM_016169.2	suppressor of fused homolog (Drosophila)	0.782013
OC3SNGnh.16592_x_at	MIRN425	microRNA 425			OCMX.6657.C1_at	SUFU			NM_016169.2	suppressor of fused homolog (Drosophila)	0.775303
OC3SNGnh.16592_x_at	MIRN425	microRNA 425			OCADNP.16957_s_at	SUFU			NM_016169.2	suppressor of fused homolog (Drosophila)	0.627127
OC3SNGnh.16592_x_at	MIRN425	microRNA 425			OC3P.13338.C1_s_at	SUFU			NM_016169.2	suppressor of fused homolog (Drosophila)	0.609861
OC3SNGnh.8263_at	MIRN449B	microRNA 449b			OCADNP.16957_s_at	SUFU			NM_016169.2	suppressor of fused homolog (Drosophila)	0.406105
OC3SNGnh.8263_at	MIRN449B	microRNA 449b			OCMX.6657.C1_at	SUFU			NM_016169.2	suppressor of fused homolog (Drosophila)	0.103981
OC3SNGnh.8263_at	MIRN449B	microRNA 449b			OCMX.6657.C1_x_at	SUFU		1.57	NM_016169.2	suppressor of fused homolog (Drosophila)	-0.198572
OC3SNGnh.8263_at	MIRN449B	microRNA 449b			OC3P.13338.C1_s_at	SUFU			NM_016169.2	suppressor of fused homolog (Drosophila)	-0.477781
OC3SNGnh.16267_at	MIRN497	microRNA 497		3.19	OC3P.13338.C1_s_at	SUFU			NM_016169.2	suppressor of fused homolog (Drosophila)	0.121066
OC3SNGnh.16267_at	MIRN497	microRNA 497		3.19	OCMX.6657.C1_x_at	SUFU		1.57	NM_016169.2	suppressor of fused homolog (Drosophila)	0.0883591
OC3SNGnh.16267_at	MIRN497	microRNA 497		3.19	OCADNP.16957_s_at	SUFU			NM_016169.2	suppressor of fused homolog (Drosophila)	0.0501081
OC3SNGnh.16267_at	MIRN497	microRNA 497		3.19	OCMX.6657.C1_at	SUFU			NM_016169.2	suppressor of fused homolog (Drosophila)	-0.374914
OC3SNGnh.10216_x_at	MIRN548A2	microRNA 548a-2	-1.5706	2.12	OCADNP.16957_s_at	SUFU			NM_016169.2	suppressor of fused homolog (Drosophila)	0.53166
OC3SNGnh.10216_x_at	MIRN548A2	microRNA 548a-2	-1.5706	2.12	OCMX.6657.C1_at	SUFU			NM_016169.2	suppressor of fused homolog (Drosophila)	0.194356
OC3SNGnh.10216_x_at	MIRN548A2	microRNA 548a-2	-1.5706	2.12	OCMX.6657.C1_x_at	SUFU		1.57	NM_016169.2	suppressor of fused homolog (Drosophila)	-0.00806391
OC3SNGnh.10216_x_at	MIRN548A2	microRNA 548a-2	-1.5706	2.12	OC3P.13338.C1_s_at	SUFU			NM_016169.2	suppressor of fused homolog (Drosophila)	-0.343207
OCMX.2904.C1_x_at	MIRN548C	microRNA 548c			OCADNP.16957_s_at	SUFU			NM_016169.2	suppressor of fused homolog (Drosophila)	0.793028
OCMX.2904.C1_x_at	MIRN548C	microRNA 548c			OCMX.6657.C1_x_at	SUFU		1.57	NM_016169.2	suppressor of fused homolog (Drosophila)	0.687346
OCMX.2904.C1_x_at	MIRN548C	microRNA 548c			OC3P.13338.C1_s_at	SUFU			NM_016169.2	suppressor of fused homolog (Drosophila)	0.464178
OCMX.2904.C1_x_at	MIRN548C	microRNA 548c			OCMX.6657.C1_at	SUFU			NM_016169.2	suppressor of fused homolog (Drosophila)	0.456467
OC3SNGnh.2107_x_at	MIRN552	microRNA 552	-1.61406		OC3P.13338.C1_s_at	SUFU			NM_016169.2	suppressor of fused homolog (Drosophila)	0.398745
OC3SNGnh.2107_x_at	MIRN552	microRNA 552	-1.61406		OCMX.6657.C1_x_at	SUFU		1.57	NM_016169.2	suppressor of fused homolog (Drosophila)	0.314234
OC3SNGnh.2107_x_at	MIRN552	microRNA 552	-1.61406		OCMX.6657.C1_at	SUFU			NM_016169.2	suppressor of fused homolog (Drosophila)	0.255941
OC3SNGnh.2107_x_at	MIRN552	microRNA 552	-1.61406		OCADNP.16957_s_at	SUFU			NM_016169.2	suppressor of fused homolog (Drosophila)	-0.108259
OC3SNGnh.7187_at	MIRN554	microRNA 554		1.76	OCMX.6657.C1_at	SUFU			NM_016169.2	suppressor of fused homolog (Drosophila)	0.921754
OC3SNGnh.7187_at	MIRN554	microRNA 554		1.76	OCADNP.16957_s_at	SUFU			NM_016169.2	suppressor of fused homolog (Drosophila)	0.847387
OC3SNGnh.7187_at	MIRN554	microRNA 554		1.76	OCMX.6657.C1_x_at	SUFU		1.57	NM_016169.2	suppressor of fused homolog (Drosophila)	0.798809
OC3SNGnh.7187_at	MIRN554	microRNA 554		1.76	OC3P.13338.C1_s_at	SUFU			NM_016169.2	suppressor of fused homolog (Drosophila)	0.562433
OC3P.3864.C1_x_at	MIRN555	microRNA 555		1.56	OCMX.6657.C1_x_at	SUFU		1.57	NM_016169.2	suppressor of fused homolog (Drosophila)	0.74719
OC3P.3864.C1_x_at	MIRN555	microRNA 555		1.56	OCMX.6657.C1_at	SUFU			NM_016169.2	suppressor of fused homolog (Drosophila)	0.707551
OC3P.3864.C1_x_at	MIRN555	microRNA 555		1.56	OCADNP.16957_s_at	SUFU			NM_016169.2	suppressor of fused homolog (Drosophila)	0.651352
OC3P.3864.C1_x_at	MIRN555	microRNA 555		1.56	OC3P.13338.C1_s_at	SUFU			NM_016169.2	suppressor of fused homolog (Drosophila)	0.639126
OC3P.3864.C1_at	MIRN555	microRNA 555		-1.5	OCADNP.16957_s_at	SUFU			NM_016169.2	suppressor of fused homolog (Drosophila)	0.586152
OC3P.3864.C1_at	MIRN555	microRNA 555		-1.5	OCMX.6657.C1_at	SUFU			NM_016169.2	suppressor of fused homolog (Drosophila)	0.573466
OC3P.3864.C1_at	MIRN555	microRNA 555		-1.5	OCMX.6657.C1_x_at	SUFU		1.57	NM_016169.2	suppressor of fused homolog (Drosophila)	0.110076
OC3P.3864.C1_at	MIRN555	microRNA 555		-1.5	OC3P.13338.C1_s_at	SUFU			NM_016169.2	suppressor of fused homolog (Drosophila)	-0.221163
OC3SNGnh.127_x_at	C1orf226	microRNA 556			OCADNP.16957_s_at	SUFU			NM_016169.2	suppressor of fused homolog (Drosophila)	0.859488
OC3SNGnh.127_x_at	C1orf226	microRNA 556			OCMX.6657.C1_x_at	SUFU		1.57	NM_016169.2	suppressor of fused homolog (Drosophila)	0.536254
OC3SNGnh.127_x_at	C1orf226	microRNA 556			OCMX.6657.C1_at	SUFU			NM_016169.2	suppressor of fused homolog (Drosophila)	0.48973
OC3SNGnh.127_x_at	C1orf226	microRNA 556			OC3P.13338.C1_s_at	SUFU			NM_016169.2	suppressor of fused homolog (Drosophila)	0.273098
[truncated: 15,158 more rows]
